# Supplementary material for: miRNA Signature of Hepatocellular Carcinoma Vascularization: How the Controls Can Influence the Signature
Source: Springer Nature journal article supplement (doi:10.1007/s10620-017-4654-3), 2017-06-21
Supplement: MOESM2 [file 12461318]

## Sheet: 1-Raw_Data
TITLE: Raw Data
			Raw data with no normalization							Normal control normalization			Cirrhotic pool normalization
	Sample Name	Target Name	Amp Score	Cq Conf	Cт	Cт Mean	Adjusted Cт Mean	ΔCт Mean	Threshold	RQ	RQ Min	RQ Max	RQ	RQ Min	RQ Max		Legend
	Normal control 2	hsa-miR-938-002181	1.043	0.705	34.543	34.543	34.543	18.721	0.04	1	1	1					green font	raw data with no normalization
	Normal control 2	hsa-miR-502-3p-002083	1.393	0.989	29.107	29.107	29.107	15.859	0.178	1	1	1	0.526	0.526	0.526		red font	normalization with the normal liver control pool
	Normal control 2	U6 snRNA-001973	1.171	0.308	8.579	10.276	10.276	-4.259	0.04	1	1	1	0.123	0.123	0.123		black font	normalization with the cirrhotic liver pool
	Normal control 2	U6 snRNA-001973	1.185	0.465	9.633	10.276	10.276	-4.259	0.04	1	1	1	0.123	0.123	0.123
	Normal control 2	U6 snRNA-001973	1.175	0.338	8.544	10.276	10.276	-4.259	0.04	1	1	1	0.123	0.123	0.123
	Normal control 2	U6 snRNA-001973	1.185	0.609	10.793	10.276	10.276	-4.259	0.04	1	1	1	0.123	0.123	0.123
	Normal control 2	U6 snRNA-001973	1.179	0.634	10.83	10.276	10.276	-4.259	0.04	1	1	1	0.123	0.123	0.123
	Normal control 2	U6 snRNA-001973	1.187	0.54	10.722	10.276	10.276	-4.259	0.04	1	1	1	0.123	0.123	0.123
	Normal control 2	U6 snRNA-001973	1.2	0.523	11.324	10.276	10.276	-4.259	0.04	1	1	1	0.123	0.123	0.123
	Normal control 2	U6 snRNA-001973	1.198	0.524	11.781	10.276	10.276	-4.259	0.04	1	1	1	0.123	0.123	0.123
	Normal control 2	hsa-miR-551b-001535	0	0	Undetermined				0.227
	Normal control 2	hsa-miR-342-3p-002260	1.307	0.738	16.783	16.783	16.783	3.534	0.063	1	1	1	0.326	0.326	0.326
	Normal control 2	hsa-miR-183#-002270	1.304	0.947	28.905	28.905	28.905	13.083	0.106	1	1	1	0.09	0.09	0.09
	Normal control 2	hsa-miR-517c-001153	1.434	0.98	30.186	30.186	30.186	16.938	0.097	1	1	1	1.441	1.441	1.441
	Normal control 2	hsa-miR-890-002209	0	0	Undetermined				0.052
	Normal control 2	hsa-miR-15b#-002173	1.095	0.642	25.238	25.238	25.238	9.416	0.065	1	1	1	0.475	0.475	0.475
	Normal control 2	hsa-miR-122-002245	1.466	0.979	15.616	15.616	15.616	2.367	0.238	1	1	1	0.703	0.703	0.703
	Normal control 2	hsa-miR-30d#-002305	1.019	0.64	25.9	25.9	25.9	10.078	0.085	1	1	1	0.308	0.308	0.308
	Normal control 2	hsa-miR-892a-002195	0	0	Undetermined				0.04
	Normal control 2	hsa-miR-193b-002367	1.376	0.974	18.547	18.547	18.547	5.299	0.217	1	1	1	0.706	0.706	0.706
	Normal control 2	hsa-miR-621-001598	0.97	0.911	28.185	28.185	28.185	12.364	0.04	1	1	1	0	0	0
	Normal control 2	mmu-miR-491-001630	1.505	0.98	26.366	26.366	26.366	13.118	0.214	1	1	1	0.109	0.109	0.109
	Normal control 2	hsa-miR-181c#-002333	0.87	0.571	30.206	30.206	30.206	14.385	0.04	1	1	1	0.025	0.025	0.025
	Normal control 2	hsa-miR-28-3p-002446	1.452	0.985	21.514	21.514	21.514	8.265	0.296	1	1	1	0.371	0.371	0.371
	Normal control 2	hsa-miR-20b-001014	1.501	0.972	22.328	22.328	22.328	9.079	0.172	1	1	1	0.312	0.312	0.312
	Normal control 2	hsa-miR-655-001612	1.291	0.938	29.943	29.943	29.943	16.694	0.072	1	1	1	0.554	0.554	0.554
	Normal control 2	rno-miR-7#-001338	1.266	0.737	23.497	23.497	23.497	7.676	0.114	1	1	1	0.134	0.134	0.134
	Normal control 2	hsa-miR-301-000528	1.36	0.976	27.879	27.879	27.879	14.63	0.198	1	1	1	0.309	0.309	0.309
	Normal control 2	hsa-miR-1296-002908	0.662	0.667	28.902	28.902	28.902	13.08	0.04	1	1	1	0.11	0.11	0.11
	Normal control 2	hsa-miR-133a-002246	1.332	0.841	22.927	22.927	22.927	9.678	0.147	1	1	1	0.458	0.458	0.458
	Normal control 2	hsa-miR-20b#-002311	0	0	Undetermined				0.171
	Normal control 2	hsa-miR-497-001043	1.402	0.949	27.199	27.199	27.199	11.377	0.261	1	1	1	0.079	0.079	0.079
	Normal control 2	hsa-miR-605-001568	0.945	0.653	31.487	31.487	31.487	15.666	0.04	1	1	1	0.139	0.139	0.139
	Normal control 2	hsa-miR-382-000572	1.305	0.618	24.415	24.415	24.415	11.167	0.1	1	1	1	0.272	0.272	0.272
	Normal control 2	hsa-miR-141-000463	1.449	0.981	29.128	29.128	29.128	15.879	0.135	1	1	1	0.01	0.01	0.01
	Normal control 2	hsa-miR-210-000512	1.246	0.765	20.929	20.929	20.929	7.681	0.055	1	1	1	0.122	0.122	0.122
	Normal control 2	hsa-miR-190-000489	1.194	0.943	35.176	35.176	35.176	21.927	0.153	1	1	1
	Normal control 2	hsa-miR-147b-002262	1.211	0.671	28.965	28.965	28.965	15.717	0.04	1	1	1	0.009	0.009	0.009
	Normal control 2	hsa-miR-944-002189	1.321	0.898	36.242	36.242	36.242	20.421	0.326	1	1	1	0.011	0.011	0.011
	Normal control 2	hsa-miR-142-3p-000464	1.48	0.972	23.526	23.526	23.526	10.277	0.336	1	1	1	0.152	0.152	0.152
	Normal control 2	hsa-miR-1292-002824	0	0	Undetermined				0.04
	Normal control 2	hsa-miR-193a-3p-002250	1.467	0.987	25.585	25.585	25.585	12.336	0.11	1	1	1	0.382	0.382	0.382
	Normal control 2	hsa-miR-625-002431	1.3	0.954	30.301	30.301	30.301	17.052	0.069	1	1	1	1.604	1.604	1.604
	Normal control 2	hsa-miR-942-002187	1.328	0.985	30.105	30.105	30.105	14.283	0.192	1	1	1	0.08	0.08	0.08
	Normal control 2	hsa-miR-708#-002342	0	0	Undetermined				0.04
	Normal control 2	hsa-miR-26b#-002444	1.374	0.956	26.197	26.197	26.197	10.376	0.199	1	1	1	0.395	0.395	0.395
	Normal control 2	hsa-miR-374b#-002391	1.494	0.986	32.396	32.396	32.396	16.574	0.374	1	1	1
	Normal control 2	hsa-miR-29b-2#-002166	1.311	0.905	28.269	28.269	28.269	12.447	0.081	1	1	1	0.281	0.281	0.281
	Normal control 2	hsa-miR-27a-000408	1.438	0.984	24.355	24.355	24.355	11.107	0.277	1	1	1	0.066	0.066	0.066
	Normal control 2	hsa-miR-508-001052	0	0	Undetermined				0.087
	Normal control 2	hsa-let-7b#-002404	0.831	0.668	29.112	29.112	29.112	13.29	0.04	1	1	1	0.148	0.148	0.148
	Normal control 2	hsa-miR-920-002150	0	0	Undetermined				0.04
	Normal control 2	hsa-miR-200c#-002286	0	0	Undetermined				0.04
	Normal control 2	hsa-miR-1259-002796	0.803	0.63	30.657	30.657	30.657	14.835	0.049	1	1	1
	Normal control 2	hsa-miR-1255B-002801	1.415	0.99	28.287	28.287	28.287	12.465	0.151	1	1	1	1.321	1.321	1.321
	Normal control 2	hsa-miR-491-3p-002360	0	0	Undetermined				0.04
	Normal control 2	hsa-miR-570-002347	1.324	0.905	30.481	30.481	30.481	17.232	0.04	1	1	1	2.089	2.089	2.089
	Normal control 2	hsa-miR-590-5p-001984	1.487	0.964	27.03	27.03	27.03	13.782	0.376	1	1	1	0.281	0.281	0.281
	Normal control 2	hsa-miR-1208-002880	0.865	0.711	30.803	30.803	30.803	14.981	0.04	1	1	1	0.037	0.037	0.037
	Normal control 2	hsa-miR-212-000515	1.376	0.898	25.52	25.52	25.52	12.272	0.1	1	1	1	0.123	0.123	0.123
	Normal control 2	hsa-miR-1247-002893	1.277	0.992	24.206	24.206	24.206	8.384	0.083	1	1	1	0.025	0.025	0.025
	Normal control 2	hsa-miR-384-000574	0	0	Undetermined				0.043
	Normal control 2	hsa-miR-607-001570	0	0	Undetermined				0.04
	Normal control 2	hsa-miR-105#-002168	0	0	Undetermined				0.04
	Normal control 2	hsa-miR-362-001273	1.346	0.983	25.954	25.954	25.954	12.705	0.162	1	1	1	0.943	0.943	0.943
	Normal control 2	hsa-miR-96#-002140	0	0	Undetermined				0.04
	Normal control 2	hsa-miR-875-3p-002204	0	0	Undetermined				0.04
	Normal control 2	hsa-miR-21-000397	1.307	0.654	18.682	18.682	18.682	5.434	0.068	1	1	1	0.159	0.159	0.159
	Normal control 2	hsa-miR-519e-002370	0	0	Undetermined				0.04
	Normal control 2	hsa-miR-1286-002773	0	0	Undetermined				0.2
	Normal control 2	hsa-miR-148b#-002160	1.522	0.952	29.726	29.726	29.726	13.904	0.435	1	1	1	0.575	0.575	0.575
	Normal control 2	hsa-miR-520f-001120	0	0	Undetermined				0.049
	Normal control 2	hsa-miR-202#-002362	0	0	Undetermined				0.04
	Normal control 2	hsa-miR-193a-5p-002281	1.403	0.976	25.531	25.531	25.531	12.282	0.391	1	1	1	0.252	0.252	0.252
	Normal control 2	hsa-miR-142-5p-002248	1.367	0.975	28.461	28.461	28.461	15.213	0.202	1	1	1	0.152	0.152	0.152
	Normal control 2	hsa-let-7f-2#-002418	1.27	0.951	29.46	29.46	29.46	13.638	0.04	1	1	1	1.093	1.093	1.093
	Normal control 2	hsa-miR-198-002273	1.168	0.933	28.31	28.31	28.31	15.061	0.04	1	1	1	0.001	0.001	0.001
	Normal control 2	hsa-miR-211-000514	0.674	0.748	29.249	29.249	29.249	16.001	0.04	1	1	1
	Normal control 2	hsa-miR-493-002364	1.434	0.974	29.321	29.321	29.321	16.072	0.119	1	1	1	0.105	0.105	0.105
	Normal control 2	hsa-miR-450b-3p-002208	0	0	Undetermined				0.04
	Normal control 2	hsa-miR-589-001543	1.238	0.933	28.971	28.971	28.971	13.149	0.109	1	1	1	0.67	0.67	0.67
	Normal control 2	hsa-miR-637-001581	0	0	Undetermined				0.04
	Normal control 2	hsa-miR-891b-002210	0	0	Undetermined				0.04
	Normal control 2	hsa-miR-627-001560	1.423	0.965	33.404	33.404	33.404	20.156	0.244	1	1	1
	Normal control 2	hsa-miR-744#-002325	1.271	0.943	26.759	26.759	26.759	10.937	0.061	1	1	1	0.341	0.341	0.341
	Normal control 2	hsa-miR-943-002188	0.807	0.079	37.613	37.613	37.613	21.791	0.04	1	1	1	0.001	0.001	0.001
	Normal control 2	hsa-miR-1293-002905	0	0	Undetermined				0.04
	Normal control 2	hsa-miR-154#-000478	0.493	0	Undetermined				0.184
	Normal control 2	hsa-miR-541-002201	0.752	0.629	32.636	32.636	32.636	19.387	0.04	1	1	1
	Normal control 2	hsa-miR-674-002021	0.723	0.818	31.344	31.344	31.344	18.096	0.04	1	1	1	0.31	0.31	0.31
	Normal control 2	hsa-miR-517a-002402	1.3	0.921	32.006	32.006	32.006	18.758	0.117	1	1	1	0.038	0.038	0.038
	Normal control 2	hsa-miR-609-001573	0	0	Undetermined				0.04
	Normal control 2	hsa-miR-10b-002218	1.137	0.771	25.532	25.532	25.532	12.284	0.19	1	1	1	0.098	0.098	0.098
	Normal control 2	hsa-miR-543-002376	1.349	0.939	28.472	28.472	28.472	12.65	0.084	1	1	1	0.547	0.547	0.547
	Normal control 2	hsa-miR-624-001557	1.428	0.985	31.539	31.539	31.539	15.718	0.155	1	1	1
	Normal control 2	hsa-miR-92a-2#-002138	0	0	Undetermined				0.075
	Normal control 2	hsa-miR-582-3p-002399	0	0	Undetermined				0.269
	Normal control 2	hsa-miR-192#-002272	1.492	0.933	24.733	24.733	24.733	8.911	0.346	1	1	1	0.619	0.619	0.619
	Normal control 2	hsa-miR-625#-002432	1.435	0.854	26.778	26.778	26.778	10.956	0.099	1	1	1	0.046	0.046	0.046
	Normal control 2	hsa-miR-554-001522	1.112	0.921	31.229	31.229	31.229	15.408	0.041	1	1	1
	Normal control 2	hsa-miR-126#-000451	1.441	0.908	22.386	22.386	22.386	6.565	0.138	1	1	1	0.043	0.043	0.043
	Normal control 2	hsa-miR-29c-000587	1.381	0.759	25.776	25.776	25.776	12.527	0.129	1	1	1	0.162	0.162	0.162
	Normal control 2	hsa-miR-488-002357	0	0	Undetermined				0.04
	Normal control 2	hsa-let-7b-002619	1.296	0.72	18.892	18.892	18.892	5.643	0.101	1	1	1	0.526	0.526	0.526
	Normal control 2	mmu-miR-374-5p-001319	1.502	0.99	22.964	22.964	22.964	9.716	0.295	1	1	1	0.278	0.278	0.278
	Normal control 2	hsa-miR-1255A-002805	0.798	0.612	31.93	31.93	31.93	16.108	0.04	1	1	1	0.001	0.001	0.001
	Normal control 2	hsa-miR-497#-002368	1.099	0.755	33.867	33.867	33.867	18.045	0.064	1	1	1	0.025	0.025	0.025
	Normal control 2	hsa-miR-99a#-002141	1.44	0.966	26.243	26.243	26.243	10.421	0.288	1	1	1	0.099	0.099	0.099
	Normal control 2	ath-miR159a-000338	0.615	0.427	20.185	20.185	20.185	6.937	0.04	1	1	1
	Normal control 2	ath-miR159a-000338	0.659	0	Undetermined	20.185	20.185	6.937	0.04	1	1	1
	Normal control 2	hsa-miR-99b#-002196	1.411	0.927	27.393	27.393	27.393	11.571	0.138	1	1	1	0.051	0.051	0.051
	Normal control 2	hsa-miR-616-001589	1.226	0.972	30.944	30.944	30.944	15.123	0.147	1	1	1	0.143	0.143	0.143
	Normal control 2	hsa-miR-27a#-002445	1.341	0.941	26.003	26.003	26.003	10.181	0.114	1	1	1	0.676	0.676	0.676
	Normal control 2	hsa-miR-518b-001156	0.682	0.206	36.367	36.367	36.367	23.118	0.044	1	1	1	0	0	0
	Normal control 2	hsa-miR-518c#-001158	0	0	Undetermined				0.04
	Normal control 2	hsa-miR-338-5P-002658	1.042	0.263	36.873	36.873	36.873	21.051	0.095	1	1	1	0	0	0
	Normal control 2	hsa-miR-24-1#-002440	1.062	0.845	28.972	28.972	28.972	13.15	0.048	1	1	1	5.127	5.127	5.127
	Normal control 2	hsa-miR-370-002275	1.319	0.983	25.358	25.358	25.358	12.11	0.092	1	1	1	0.252	0.252	0.252
	Normal control 2	hsa-miR-10a#-002288	1.343	0.93	30.411	30.411	30.411	14.589	0.128	1	1	1	1.52	1.52	1.52
	Normal control 2	hsa-miR-425-5p-001516	1.254	0.884	22.474	22.474	22.474	9.225	0.078	1	1	1	0.547	0.547	0.547
	Normal control 2	hsa-miR-429-001024	1.465	0.988	28.689	28.689	28.689	15.441	0.281	1	1	1	0.096	0.096	0.096
	Normal control 2	hsa-miR-34c-000428	0.918	0.708	35.942	35.942	35.942	22.693	0.121	1	1	1	0.003	0.003	0.003
	Normal control 2	hsa-miR-18a-002422	1.418	0.982	27.751	27.751	27.751	14.502	0.352	1	1	1	0.181	0.181	0.181
	Normal control 2	hsa-miR-548b-5p-002408	1.295	0.956	29.115	29.115	29.115	15.866	0.097	1	1	1	0.341	0.341	0.341
	Normal control 2	hsa-miR-559-001527	0	0	Undetermined				0.04
	Normal control 2	hsa-miR-492-001039	0.562	0.304	27.117	27.117	27.117	13.868	0.04	1	1	1	0.001	0.001	0.001
	Normal control 2	hsa-miR-199a-3p-002304	1.42	0.927	21.609	21.609	21.609	8.36	0.236	1	1	1	0.114	0.114	0.114
	Normal control 2	hsa-miR-217-002337	1.092	0.768	33.502	33.502	33.502	20.253	0.129	1	1	1	1.404	1.404	1.404
	Normal control 2	hsa-miR-216a-002220	1.266	0.853	27.987	27.987	27.987	14.739	0.066	1	1	1	0.011	0.011	0.011
	Normal control 2	hsa-miR-639-001583	0.99	0.781	28.839	28.839	28.839	13.017	0.04	1	1	1	0	0	0
	Normal control 2	hsa-miR-1301-002827	0	0	Undetermined				0.04
	Normal control 2	hsa-miR-598-001988	1.467	0.989	28.951	28.951	28.951	15.702	0.225	1	1	1	0.369	0.369	0.369
	Normal control 2	hsa-miR-1826-002873	0	0	Undetermined				0.2
	Normal control 2	hsa-miR-517b-001152	0.646	0.493	34.393	34.393	34.393	21.144	0.04	1	1	1
	Normal control 2	hsa-miR-525-3p-002385	0	0	Undetermined				0.065
	Normal control 2	hsa-miR-1238-002927	0.657	0.193	34.519	34.519	34.519	18.698	0.04	1	1	1
	Normal control 2	hsa-miR-1226#-002758	1.184	0.897	28.587	28.587	28.587	12.765	0.073	1	1	1	0.316	0.316	0.316
	Normal control 2	hsa-miR-453-002318	0	0	Undetermined				0.083
	Normal control 2	hsa-miR-302a-000529	0.521	0	Undetermined				0.042
	Normal control 2	hsa-miR-362-3p-002117	1.483	0.986	29.4	29.4	29.4	16.151	0.22	1	1	1	0.286	0.286	0.286
	Normal control 2	hsa-miR-548c-001590	0	0	Undetermined				0.075
	Normal control 2	hsa-miR-145#-002149	1.421	0.933	27.238	27.238	27.238	11.416	0.289	1	1	1	0.153	0.153	0.153
	Normal control 2	hsa-miR-195-000494	1.435	0.966	23.392	23.392	23.392	10.144	0.256	1	1	1	0.058	0.058	0.058
	Normal control 2	hsa-miR-184-000485	1.485	0.974	30.365	30.365	30.365	17.116	0.135	1	1	1	0.095	0.095	0.095
	Normal control 2	hsa-miR-509-5p-002235	0	0	Undetermined				0.04
	Normal control 2	hsa-miR-519b-3p-002384	0.689	0	Undetermined				0.121
	Normal control 2	hsa-miR-640-001584	0.317	0.241	20.805	20.805	20.805	4.983	0.04	1	1	1	11,422.550	11,422.550	11,422.550
	Normal control 2	hsa-miR-507-001051	0	0	Undetermined				0.2
	Normal control 2	hsa-miR-657-001512	0.674	0.182	31.589	31.589	31.589	15.768	0.04	1	1	1
	Normal control 2	hsa-miR-378-000567	1.508	0.96	28.494	28.494	28.494	12.672	0.386	1	1	1	2.929	2.929	2.929
	Normal control 2	hsa-miR-638-001582	0.681	0.549	31.136	31.136	31.136	15.314	0.04	1	1	1	0.044	0.044	0.044
	Normal control 2	hsa-miR-26b-000407	1.303	0.854	22.514	22.514	22.514	9.266	0.139	1	1	1	0.428	0.428	0.428
	Normal control 2	hsa-miR-196a#-002336	0	0	Undetermined				0.118
	Normal control 2	hsa-miR-34b-002102	1.153	0.774	30.723	30.723	30.723	14.901	0.096	1	1	1	0.621	0.621	0.621
	Normal control 2	hsa-miR-204-000508	1.391	0.842	23.338	23.338	23.338	10.089	0.117	1	1	1	0.255	0.255	0.255
	Normal control 2	hsa-miR-874-002268	0.988	0.887	26.297	26.297	26.297	13.048	0.04	1	1	1	0.137	0.137	0.137
	Normal control 2	hsa-let-7g#-002118	1.265	0.926	27.702	27.702	27.702	11.88	0.075	1	1	1	7.514	7.514	7.514
	Normal control 2	hsa-miR-622-001553	1.239	0.983	28.357	28.357	28.357	12.536	0.15	1	1	1	0.197	0.197	0.197
	Normal control 2	hsa-miR-185#-002104	0	0	Undetermined				0.076
	Normal control 2	hsa-miR-299-5p-000600	1.124	0.778	28.987	28.987	28.987	15.738	0.051	1	1	1	0	0	0
	Normal control 2	hsa-miR-483-5p-002338	1.501	0.983	22.645	22.645	22.645	9.397	0.278	1	1	1	0.519	0.519	0.519
	Normal control 2	hsa-miR-1305-002867	0.897	0.379	34.075	34.075	34.075	18.254	0.04	1	1	1	0	0	0
	Normal control 2	hsa-miR-500-001046	0.833	0.76	29.734	29.734	29.734	13.913	0.04	1	1	1
	Normal control 2	hsa-miR-128a-002216	1.412	0.973	27.215	27.215	27.215	13.967	0.257	1	1	1	0.694	0.694	0.694
	Normal control 2	hsa-miR-541#-002200	0.504	0.127	15.92	15.92	15.92	0.098	0.04	1	1	1	0.332	0.332	0.332
	Normal control 2	hsa-miR-489-002358	1.499	0.987	26.527	26.527	26.527	13.278	0.136	1	1	1	0.08	0.08	0.08
	Normal control 2	hsa-miR-889-002202	1.346	0.954	28.939	28.939	28.939	15.69	0.053	1	1	1	0.003	0.003	0.003
	Normal control 2	hsa-let-7e-002406	1.313	0.751	18.787	18.787	18.787	5.539	0.167	1	1	1	0.512	0.512	0.512
	Normal control 2	hsa-miR-23a-000399	0.762	0.902	24.853	24.853	24.853	11.605	0.04	1	1	1	0.331	0.331	0.331
	Normal control 2	hsa-miR-1251-002820	0	0.293	37.169	37.169	37.169	21.347	0.069	1	1	1
	Normal control 2	hsa-let-7i#-002172	1.36	0.946	29.498	29.498	29.498	13.677	0.174	1	1	1	0.236	0.236	0.236
	Normal control 2	hsa-miR-1288-002832	0	0	Undetermined				0.04
	Normal control 2	hsa-miR-596-001550	0.77	0.593	22.35	22.35	22.35	6.529	0.04	1	1	1	0.162	0.162	0.162
	Normal control 2	hsa-miR-580-001621	0.722	0.474	36.944	36.944	36.944	21.122	0.042	1	1	1	0.017	0.017	0.017
	Normal control 2	hsa-miR-411#-002238	1.208	0.964	30.436	30.436	30.436	14.614	0.104	1	1	1
	Normal control 2	hsa-miR-219-000522	0.566	0.06	38.103	38.103	38.103	24.855	0.105	1	1	1
	Normal control 2	hsa-miR-1294-002785	0	0	Undetermined				0.094
	Normal control 2	hsa-miR-213-000516	1.321	0.921	28.253	28.253	28.253	12.431	0.156	1	1	1	0.306	0.306	0.306
	Normal control 2	hsa-miR-149#-002164	0.925	0.918	24.078	24.078	24.078	8.257	0.04	1	1	1	0.845	0.845	0.845
	Normal control 2	hsa-miR-663B-002857	1.132	0.745	19.715	19.715	19.715	3.893	0.041	1	1	1	0.209	0.209	0.209
	Normal control 2	hsa-let-7a-000377	1.333	0.843	21.456	21.456	21.456	8.208	0.056	1	1	1	0.511	0.511	0.511
	Normal control 2	hsa-miR-32-002109	1.398	0.958	28.914	28.914	28.914	15.666	0.141	1	1	1	0.351	0.351	0.351
	Normal control 2	hsa-miR-643-001594	1.011	0.752	30.623	30.623	30.623	14.802	0.04	1	1	1	1.054	1.054	1.054
	Normal control 2	hsa-miR-1197-002810	1.166	0.846	30.804	30.804	30.804	14.983	0.046	1	1	1
	Normal control 2	hsa-miR-603-001566	0	0	Undetermined				0.157
	Normal control 2	hsa-miR-1180-002847	1.193	0.905	27.654	27.654	27.654	11.832	0.108	1	1	1	0.484	0.484	0.484
	Normal control 2	hsa-miR-1264-002799	0	0	Undetermined				0.04
	Normal control 2	hsa-miR-545-002267	1.193	0.921	34.605	34.605	34.605	21.356	0.157	1	1	1	0.018	0.018	0.018
	Normal control 2	hsa-miR-100-000437	1.328	0.697	19.789	19.789	19.789	6.541	0.085	1	1	1	0.257	0.257	0.257
	Normal control 2	hsa-miR-1182-002830	0.669	0.195	35.826	35.826	35.826	20.004	0.04	1	1	1
	Normal control 2	hsa-miR-519a-002415	1.456	0.979	30.522	30.522	30.522	17.273	0.075	1	1	1	0	0	0
	Normal control 2	hsa-miR-135b-002261	1.457	0.971	27.813	27.813	27.813	14.565	0.133	1	1	1	0.123	0.123	0.123
	Normal control 2	hsa-miR-1256-002850	1.145	0.794	32.913	32.913	32.913	17.091	0.055	1	1	1
	Normal control 2	hsa-miR-548d-001605	1.357	0.965	33.227	33.227	33.227	19.979	0.188	1	1	1
	Normal control 2	hsa-miR-103-000439	1.297	0.806	22.002	22.002	22.002	8.754	0.079	1	1	1	0.438	0.438	0.438
	Normal control 2	hsa-miR-485-3p-001277	1.421	0.992	28.965	28.965	28.965	15.716	0.054	1	1	1	0.29	0.29	0.29
	Normal control 2	hsa-miR-363-001271	1.39	0.974	29.905	29.905	29.905	16.656	0.12	1	1	1	0.008	0.008	0.008
	Normal control 2	hsa-miR-518f#-002387	0	0	Undetermined				0.065
	Normal control 2	hsa-miR-16-000391	1.401	0.981	19.724	19.724	19.724	6.476	0.255	1	1	1	0.183	0.183	0.183
	Normal control 2	hsa-miR-518e#-002371	0.589	0	Undetermined				0.16
	Normal control 2	hsa-miR-127-000452	1.469	0.979	25.245	25.245	25.245	11.996	0.322	1	1	1	0.147	0.147	0.147
	Normal control 2	hsa-miR-146a#-002163	1.274	0.844	33.17	33.17	33.17	17.348	0.175	1	1	1
	Normal control 2	hsa-miR-31-002279	1.41	0.973	26.536	26.536	26.536	13.288	0.298	1	1	1	0.037	0.037	0.037
	Normal control 2	hsa-miR-454-002323	1.495	0.975	23.877	23.877	23.877	10.628	0.339	1	1	1	0.067	0.067	0.067
	Normal control 2	hsa-miR-139-5p-002289	1.442	0.986	20.121	20.121	20.121	6.873	0.246	1	1	1	1.224	1.224	1.224
	Normal control 2	hsa-miR-561-001528	0.553	0.287	27.279	27.279	27.279	14.03	0.04	1	1	1	0	0	0
	Normal control 2	hsa-miR-433-001028	1.433	0.985	27.413	27.413	27.413	14.165	0.117	1	1	1	0.332	0.332	0.332
	Normal control 2	hsa-miR-183-002269	1.19	0.916	31.771	31.771	31.771	18.522	0.075	1	1	1	0.683	0.683	0.683
	Normal control 2	mmu-miR-129-3p-001184	0.927	0.441	27.247	27.247	27.247	13.998	0.054	1	1	1
	Normal control 2	hsa-miR-618-001593	1.368	0.961	28.325	28.325	28.325	15.077	0.113	1	1	1	0.036	0.036	0.036
	Normal control 2	hsa-miR-1291-002838	1.375	0.944	26.303	26.303	26.303	10.481	0.163	1	1	1	0.15	0.15	0.15
	Normal control 2	hsa-miR-486-3p-002093	0.973	0.931	30.798	30.798	30.798	17.549	0.04	1	1	1	0.001	0.001	0.001
	Normal control 2	hsa-miR-30b#-002129	0	0	Undetermined				0.04
	Normal control 2	hsa-miR-448-001029	0	0	Undetermined				0.2
	Normal control 2	hsa-miR-200b#-002274	0.723	0.23	35.361	35.361	35.361	19.54	0.057	1	1	1	0.001	0.001	0.001
	Normal control 2	hsa-miR-520g-001121	0.703	0.144	38.142	38.142	38.142	24.894	0.076	1	1	1	0.076	0.076	0.076
	Normal control 2	hsa-miR-194#-002379	1.149	0.775	24.255	24.255	24.255	8.434	0.04	1	1	1
	Normal control 2	hsa-miR-302b#-002119	0	0	Undetermined				0.04
	Normal control 2	hsa-miR-769-5p-001998	1.47	0.935	25.64	25.64	25.64	9.818	0.096	1	1	1	1.883	1.883	1.883
	Normal control 2	hsa-miR-1324-002815	0	0	Undetermined				0.04
	Normal control 2	hsa-miR-136#-002100	1.484	0.941	28.428	28.428	28.428	12.606	0.244	1	1	1	0.066	0.066	0.066
	Normal control 2	hsa-miR-548N-002888	0	0	Undetermined				0.04
	Normal control 2	hsa-miR-200a#-001011	1.43	0.958	29.761	29.761	29.761	13.939	0.314	1	1	1	0.016	0.016	0.016
	Normal control 2	hsa-miR-192-000491	1.448	0.977	17.482	17.482	17.482	4.234	0.127	1	1	1	0.344	0.344	0.344
	Normal control 2	dme-miR-7-000268	1.386	0.974	28.287	28.287	28.287	12.465	0.122	1	1	1	1.747	1.747	1.747
	Normal control 2	hsa-miR-323-3p-002227	1.405	0.941	26.739	26.739	26.739	13.49	0.07	1	1	1	0.207	0.207	0.207
	Normal control 2	hsa-miR-569-001536	0	0	Undetermined				0.04
	Normal control 2	hsa-miR-25-000403	1.543	0.981	24.967	24.967	24.967	11.719	0.436	1	1	1	0.384	0.384	0.384
	Normal control 2	hsa-miR-214#-002293	1.471	0.969	25.054	25.054	25.054	9.232	0.209	1	1	1	0.062	0.062	0.062
	Normal control 2	hsa-miR-18b-002217	1.059	0.884	26.109	26.109	26.109	12.86	0.067	1	1	1	2.779	2.779	2.779
	Normal control 2	hsa-miR-590-3P-002677	1.414	0.896	25.881	25.881	25.881	10.059	0.085	1	1	1	0.192	0.192	0.192
	Normal control 2	hsa-miR-937-002180	0	0	Undetermined				0.09
	Normal control 2	hsa-miR-518c-002401	0	0	Undetermined				0.041
	Normal control 2	hsa-miR-520a-001167	0	0.381	36.872	36.872	36.872	23.623	0.046	1	1	1	0	0	0
	Normal control 2	hsa-miR-767-5p-001993	0	0	Undetermined				0.044
	Normal control 2	hsa-miR-154-000477	0.998	0.926	33.2	33.2	33.2	19.951	0.067	1	1	1
	Normal control 2	hsa-miR-578-001619	0	0	Undetermined				0.2
	Normal control 2	hsa-miR-146b-3p-002361	1.396	0.974	28.791	28.791	28.791	15.542	0.205	1	1	1	0.175	0.175	0.175
	Normal control 2	hsa-miR-885-5p-002296	1.412	0.951	18.232	18.232	18.232	4.983	0.124	1	1	1	0.963	0.963	0.963
	Normal control 2	hsa-miR-1243-002854	0.51	0.212	17.119	17.119	17.119	1.297	0.04	1	1	1
	Normal control 2	hsa-miR-577-002675	1.437	0.958	33.345	33.345	33.345	17.523	0.227	1	1	1	0.762	0.762	0.762
	Normal control 2	mmu-miR-153-001191	0	0	Undetermined				0.04
	Normal control 2	hsa-miR-875-5p-002203	1.186	0.213	21.836	21.836	21.836	6.015	0.04	1	1	1	0	0	0
	Normal control 2	hsa-miR-326-000542	0.88	0.775	31.711	31.711	31.711	18.462	0.04	1	1	1	9.391	9.391	9.391
	Normal control 2	hsa-miR-106b-000442	1.461	0.982	23.318	23.318	23.318	10.069	0.198	1	1	1	0.157	0.157	0.157
	Normal control 2	hsa-miR-628-5p-002433	1.551	0.986	27.485	27.485	27.485	14.237	0.464	1	1	1	0.132	0.132	0.132
	Normal control 2	hsa-miR-411-001610	1.467	0.98	27.321	27.321	27.321	14.072	0.302	1	1	1	0.175	0.175	0.175
	Normal control 2	hsa-miR-7-2#-002314	1.245	0.949	29.01	29.01	29.01	13.188	0.058	1	1	1
	Normal control 2	hsa-miR-1263-002784	0	0	Undetermined				0.04
	Normal control 2	hsa-miR-649-001602	1.134	0.959	29.798	29.798	29.798	13.976	0.073	1	1	1	0.662	0.662	0.662
	Normal control 2	hsa-miR-361-3p-002116	0.854	0.545	31.194	31.194	31.194	15.372	0.046	1	1	1	0.003	0.003	0.003
	Normal control 2	hsa-miR-372-000560	1.403	0.969	29.081	29.081	29.081	15.833	0.12	1	1	1	0.428	0.428	0.428
	Normal control 2	hsa-miR-30e-3p-000422	1.474	0.907	20.465	20.465	20.465	4.643	0.187	1	1	1	0.186	0.186	0.186
	Normal control 2	hsa-miR-548G-002879	0	0	Undetermined				0.04
	Normal control 2	hsa-miR-224-002099	1.431	0.984	24.875	24.875	24.875	11.626	0.271	1	1	1	0.224	0.224	0.224
	Normal control 2	hsa-miR-1290-002863	1.469	0.98	24.983	24.983	24.983	9.162	0.139	1	1	1	0.097	0.097	0.097
	Normal control 2	hsa-miR-93#-002139	1.509	0.98	24.459	24.459	24.459	8.637	0.315	1	1	1	0.467	0.467	0.467
	Normal control 2	hsa-miR-512-3p-001823	0	0	Undetermined				0.103
	Normal control 2	hsa-miR-1271-002779	1.412	0.986	25.601	25.601	25.601	9.78	0.219	1	1	1	4.007	4.007	4.007
	Normal control 2	hsa-miR-33b-002085	0.631	0.359	30.549	30.549	30.549	17.301	0.061	1	1	1
	Normal control 2	hsa-miR-133b-002247	1.196	0.936	28.604	28.604	28.604	15.356	0.06	1	1	1	0.066	0.066	0.066
	Normal control 2	hsa-miR-220b-002206	0	0	Undetermined				0.04
	Normal control 2	hsa-miR-520h-001170	0	0	Undetermined				0.106
	Normal control 2	hsa-miR-515-5p-001112	0	0	Undetermined				0.172
	Normal control 2	hsa-miR-630-001563	1.093	0.828	31.377	31.377	31.377	15.556	0.059	1	1	1	2.407	2.407	2.407
	Normal control 2	hsa-miR-654-3p-002239	1.147	0.854	30.856	30.856	30.856	17.608	0.11	1	1	1
	Normal control 2	hsa-miR-24-000402	1.344	0.84	16.86	16.86	16.86	3.611	0.165	1	1	1	0.187	0.187	0.187
	Normal control 2	hsa-miR-214-002306	1.428	0.985	20.977	20.977	20.977	7.728	0.208	1	1	1	0.124	0.124	0.124
	Normal control 2	hsa-let-7f-1#-002417	0.829	0.673	30.447	30.447	30.447	14.625	0.04	1	1	1	0.546	0.546	0.546
	Normal control 2	hsa-miR-574-3p-002349	1.407	0.913	19.093	19.093	19.093	5.844	0.225	1	1	1	1.459	1.459	1.459
	Normal control 2	hsa-miR-148a#-002134	1.226	0.964	27.479	27.479	27.479	11.658	0.04	1	1	1	0.706	0.706	0.706
	Normal control 2	hsa-miR-615-5p-002353	0.926	0.626	32.895	32.895	32.895	19.647	0.04	1	1	1	0.055	0.055	0.055
	Normal control 2	hsa-miR-629-001562	1.293	0.881	27.138	27.138	27.138	11.317	0.13	1	1	1	0.318	0.318	0.318
	Normal control 2	hsa-miR-151-3p-002254	1.492	0.927	22.056	22.056	22.056	6.234	0.286	1	1	1	0.122	0.122	0.122
	Normal control 2	hsa-miR-340-002258	1.502	0.982	26.799	26.799	26.799	13.55	0.365	1	1	1	0.524	0.524	0.524
	Normal control 2	hsa-miR-380-3p-000569	0	0.054	36.898	36.898	36.898	23.65	0.04	1	1	1	0	0	0
	Normal control 2	hsa-miR-141#-002145	0	0	Undetermined				0.394
	Normal control 2	hsa-miR-647-001600	0	0	Undetermined				0.04
	Normal control 2	hsa-miR-532-3p-002355	1.385	0.77	22.928	22.928	22.928	9.68	0.102	1	1	1	0.427	0.427	0.427
	Normal control 2	hsa-miR-508-5p-002092	0.575	0.086	22.456	22.456	22.456	9.208	0.04	1	1	1	0.005	0.005	0.005
	Normal control 2	hsa-miR-296-000527	1.137	0.796	29.038	29.038	29.038	15.79	0.05	1	1	1	0.122	0.122	0.122
	Normal control 2	hsa-miR-1289-002871	0	0	Undetermined				0.04
	Normal control 2	hsa-miR-365-001020	1.322	0.977	21.618	21.618	21.618	8.369	0.158	1	1	1	3.39	3.39	3.39
	Normal control 2	hsa-miR-330-000544	1.107	0.416	25.088	25.088	25.088	11.839	0.044	1	1	1	0.927	0.927	0.927
	Normal control 2	hsa-let-7f-000382	1.113	0.875	25.579	25.579	25.579	12.33	0.082	1	1	1	0.477	0.477	0.477
	Normal control 2	hsa-miR-9-000583	1.258	0.72	25.986	25.986	25.986	12.738	0.075	1	1	1	0.2	0.2	0.2
	Normal control 2	hsa-miR-650-001603	1.257	0.782	23.013	23.013	23.013	7.191	0.04	1	1	1	0.12	0.12	0.12
	Normal control 2	hsa-miR-376c-002122	1.33	0.903	24.55	24.55	24.55	11.302	0.159	1	1	1	0.227	0.227	0.227
	Normal control 2	hsa-miR-592-001546	1.435	0.987	27.138	27.138	27.138	11.316	0.257	1	1	1	0.37	0.37	0.37
	Normal control 2	hsa-miR-181a-000480	1.17	0.947	24.564	24.564	24.564	11.315	0.082	1	1	1	0.089	0.089	0.089
	Normal control 2	hsa-miR-19b-1#-002425	1.445	0.981	27.445	27.445	27.445	11.623	0.236	1	1	1	0.209	0.209	0.209
	Normal control 2	hsa-miR-581-001622	0	0	Undetermined				0.054
	Normal control 2	hsa-miR-149-002255	1.315	0.986	23.948	23.948	23.948	10.7	0.11	1	1	1	0.429	0.429	0.429
	Normal control 2	hsa-miR-483-3p-002339	1.209	0.565	21.594	21.594	21.594	5.773	0.04	1	1	1	1.155	1.155	1.155
	Normal control 2	hsa-miR-218-2#-002294	1.084	0.914	35.363	35.363	35.363	19.541	0.1	1	1	1
	Normal control 2	hsa-miR-208b-002290	0	0	Undetermined				0.264
	Normal control 2	hsa-miR-125b-2#-002158	1.205	0.594	22.756	22.756	22.756	6.934	0.04	1	1	1	0.271	0.271	0.271
	Normal control 2	hsa-miR-1276-002843	1.341	0.899	30.444	30.444	30.444	14.622	0.151	1	1	1	1.353	1.353	1.353
	Normal control 2	hsa-miR-675-002005	1.11	0.722	24.589	24.589	24.589	8.767	0.04	1	1	1	0.384	0.384	0.384
	Normal control 2	hsa-miR-29b-000413	1.385	0.963	26.778	26.778	26.778	13.53	0.253	1	1	1	0.234	0.234	0.234
	Normal control 2	hsa-miR-936-002179	0	0	Undetermined				0.2
	Normal control 2	hsa-miR-573-001615	0.733	0.459	35.219	35.219	35.219	19.397	0.04	1	1	1
	Normal control 2	hsa-miR-101-002253	1.468	0.982	27.316	27.316	27.316	14.067	0.282	1	1	1	0.251	0.251	0.251
	Normal control 2	hsa-miR-575-001617	0.805	0.548	32.319	32.319	32.319	16.498	0.04	1	1	1
	Normal control 2	hsa-miR-338-3p-002252	1.317	0.969	29.243	29.243	29.243	15.994	0.081	1	1	1	0.037	0.037	0.037
	Normal control 2	hsa-miR-521-001122	0.79	0.054	38.75	38.75	38.75	25.502	0.101	1	1	1
	Normal control 2	hsa-miR-659-001514	0	0.025	38.193	38.193	38.193	22.372	0.04	1	1	1
	Normal control 2	hsa-miR-140-3p-002234	1.331	0.884	24.88	24.88	24.88	11.632	0.105	1	1	1	0.433	0.433	0.433
	Normal control 2	hsa-miR-501-3p-002435	0.617	0.821	29.998	29.998	29.998	16.75	0.04	1	1	1	0.003	0.003	0.003
	Normal control 2	hsa-miR-488-001106	0	0	Undetermined				0.04
	Normal control 2	hsa-miR-380-5p-000570	1.38	0.938	32.046	32.046	32.046	16.225	0.18	1	1	1	0.043	0.043	0.043
	Normal control 2	hsa-miR-487b-001285	1.441	0.977	28.28	28.28	28.28	15.031	0.166	1	1	1	0.239	0.239	0.239
	Normal control 2	hsa-miR-223#-002098	1.406	0.977	26.619	26.619	26.619	10.798	0.217	1	1	1	0.176	0.176	0.176
	Normal control 2	hsa-miR-606-001569	0	0	Undetermined				0.178
	Normal control 2	hsa-miR-613-001586	0	0	Undetermined				0.054
	Normal control 2	hsa-miR-548J-002783	1.134	0.843	32.577	32.577	32.577	16.755	0.075	1	1	1	0.105	0.105	0.105
	Normal control 2	hsa-miR-494-002365	1.396	0.975	27.03	27.03	27.03	13.782	0.181	1	1	1	0.099	0.099	0.099
	Normal control 2	hsa-miR-26a-1#-002443	1.335	0.949	26.926	26.926	26.926	11.104	0.149	1	1	1	0.123	0.123	0.123
	Normal control 2	hsa-miR-23a#-002439	1.145	0.969	31.115	31.115	31.115	15.293	0.056	1	1	1
	Normal control 2	hsa-miR-567-001534	0.649	0.37	32.853	32.853	32.853	17.031	0.04	1	1	1	0.001	0.001	0.001
	Normal control 2	hsa-miR-328-000543	1.349	0.961	24.888	24.888	24.888	11.639	0.152	1	1	1	0.665	0.665	0.665
	Normal control 2	hsa-miR-223-002295	1.454	0.837	15.953	15.953	15.953	2.704	0.112	1	1	1	0.565	0.565	0.565
	Normal control 2	rno-miR-29c#-001818	1.382	0.991	25.513	25.513	25.513	9.691	0.204	1	1	1	0.263	0.263	0.263
	Normal control 2	hsa-miR-374-000563	1.5	0.978	22.137	22.137	22.137	8.889	0.145	1	1	1	0.524	0.524	0.524
	Normal control 2	hsa-miR-505#-002087	1.389	0.944	27.38	27.38	27.38	11.559	0.258	1	1	1	0.499	0.499	0.499
	Normal control 2	hsa-miR-523-002386	0.286	0	Undetermined				0.049
	Normal control 2	hsa-miR-516a-5p-002416	0	0	Undetermined				0.087
	Normal control 2	hsa-miR-626-001559	0	0	Undetermined				0.05
	Normal control 2	hsa-miR-222-002276	1.557	0.947	19.535	19.535	19.535	6.287	0.189	1	1	1	0.031	0.031	0.031
	Normal control 2	hsa-miR-513-5p-002090	0	0	Undetermined				0.04
	Normal control 2	hsa-miR-1244-002791	1.495	0.96	26.074	26.074	26.074	10.252	0.25	1	1	1	0.918	0.918	0.918
	Normal control 2	hsa-miR-520d-5p-002393	0	0	Undetermined				0.04
	Normal control 2	hsa-miR-95-000433	1.379	0.765	24.342	24.342	24.342	11.093	0.114	1	1	1	0.085	0.085	0.085
	Normal control 2	hsa-miR-518f-002388	0.84	0.808	34.003	34.003	34.003	20.755	0.052	1	1	1	0	0	0
	Normal control 2	hsa-miR-1282-002803	1.189	0.835	29.581	29.581	29.581	13.759	0.048	1	1	1	3.041	3.041	3.041
	Normal control 2	hsa-miR-206-000510	1.542	0.985	31.488	31.488	31.488	15.666	0.282	1	1	1	0.328	0.328	0.328
	Normal control 2	hsa-miR-548a-001538	0	0	Undetermined				0.167
	Normal control 2	hsa-miR-593-002411	0	0	Undetermined				0.04
	Normal control 2	hsa-let-7c#-002405	0.931	0.879	29.431	29.431	29.431	13.609	0.04	1	1	1	0.314	0.314	0.314
	Normal control 2	hsa-miR-595-001987	0	0	Undetermined				0.04
	Normal control 2	hsa-miR-526b-002382	0	0	Undetermined				0.132
	Normal control 2	hsa-miR-34b-000427	0	0	Undetermined				0.09
	Normal control 2	hsa-miR-367#-002121	0	0	Undetermined				0.04
	Normal control 2	hsa-miR-26a-2#-002115	1.341	0.98	28.221	28.221	28.221	12.4	0.062	1	1	1	1.015	1.015	1.015
	Normal control 2	hsa-miR-196b-002215	1.418	0.968	31.189	31.189	31.189	17.941	0.3	1	1	1	0.542	0.542	0.542
	Normal control 2	hsa-miR-516b-001150	0	0	Undetermined				0.099
	Normal control 2	hsa-miR-30c-000419	1.42	0.976	18.641	18.641	18.641	5.393	0.271	1	1	1	0.385	0.385	0.385
	Normal control 2	hsa-miR-1254-002818	1.342	0.968	26.892	26.892	26.892	11.071	0.166	1	1	1	0.134	0.134	0.134
	Normal control 2	hsa-miR-181a-2#-002317	1.382	0.962	27.171	27.171	27.171	11.35	0.226	1	1	1	0.183	0.183	0.183
	Normal control 2	hsa-miR-672-002327	0	0	Undetermined				0.04
	Normal control 2	hsa-miR-513B-002757	0	0	Undetermined				0.04
	Normal control 2	hsa-miR-1200-002829	0.975	0.898	33.38	33.38	33.38	17.559	0.055	1	1	1
	Normal control 2	hsa-miR-1204-002872	0	0	Undetermined				0.04
	Normal control 2	hsa-miR-450b-5p-002207	1.355	0.926	29.497	29.497	29.497	16.249	0.048	1	1	1	7.146	7.146	7.146
	Normal control 2	hsa-miR-629-002436	1.366	0.992	29.943	29.943	29.943	16.695	0.091	1	1	1	2.961	2.961	2.961
	Normal control 2	hsa-miR-520c-3p-002400	1.031	0.423	27.428	27.428	27.428	11.606	0.06	1	1	1	12.72	12.72	12.72
	Normal control 2	hsa-miR-1267-002885	0.952	0.914	30.845	30.845	30.845	15.023	0.06	1	1	1	0.043	0.043	0.043
	Normal control 2	hsa-miR-335-000546	1.359	0.951	26.912	26.912	26.912	13.664	0.184	1	1	1	0.16	0.16	0.16
	Normal control 2	hsa-miR-520b-001116	1.06	0.492	31.405	31.405	31.405	18.156	0.041	1	1	1	0	0	0
	Normal control 2	hsa-miR-671-3p-002322	1.43	0.95	29.443	29.443	29.443	16.195	0.236	1	1	1	0.224	0.224	0.224
	Normal control 2	hsa-miR-515-3p-002369	0	0	Undetermined				0.368
	Normal control 2	hsa-miR-409-5p-002331	1.206	0.852	31.675	31.675	31.675	18.426	0.062	1	1	1
	Normal control 2	hsa-miR-449b-001608	1.324	0.953	30.225	30.225	30.225	16.977	0.073	1	1	1	0.61	0.61	0.61
	Normal control 2	hsa-miR-548H-002816	0	0	Undetermined				0.246
	Normal control 2	hsa-miR-17-002308	1.513	0.993	17.574	17.574	17.574	4.326	0.158	1	1	1	0.143	0.143	0.143
	Normal control 2	hsa-miR-15a-000389	1.07	0.105	18.702	18.702	18.702	5.453	0.055	1	1	1	12.18	12.18	12.18
	Normal control 2	hsa-miR-645-001597	0.918	0.631	36.897	36.897	36.897	21.075	0.04	1	1	1	0.182	0.182	0.182
	Normal control 2	hsa-miR-337-5p-002156	1.421	0.981	28.43	28.43	28.43	15.181	0.16	1	1	1	0.006	0.006	0.006
	Normal control 2	hsa-miR-548M-002775	0	0	Undetermined				0.2
	Normal control 2	hsa-miR-934-002177	0	0	Undetermined				0.126
	Normal control 2	hsa-miR-600-001556	0	0	Undetermined				0.04
	Normal control 2	hsa-miR-30b-000602	1.386	0.858	18.149	18.149	18.149	4.901	0.154	1	1	1	0.477	0.477	0.477
	Normal control 2	hsa-miR-604-001567	1.186	0.947	31.69	31.69	31.69	15.868	0.082	1	1	1	0	0	0
	Normal control 2	hsa-miR-455-001280	1.433	0.987	24.897	24.897	24.897	11.648	0.18	1	1	1	0.205	0.205	0.205
	Normal control 2	hsa-miR-10b#-002315	1.415	0.986	28.482	28.482	28.482	12.661	0.258	1	1	1	0.073	0.073	0.073
	Normal control 2	hsa-miR-24-2#-002441	1.229	0.894	29.044	29.044	29.044	13.222	0.08	1	1	1	0.167	0.167	0.167
	Normal control 2	hsa-miR-576-5p-002350	1.139	0.63	26.96	26.96	26.96	13.712	0.04	1	1	1	0.854	0.854	0.854
	Normal control 2	hsa-miR-941-002183	1.146	0.906	26.776	26.776	26.776	10.954	0.04	1	1	1	0.316	0.316	0.316
	Normal control 2	hsa-miR-587-001540	0.628	0	39.45	39.45	39.45	23.629	0.04	1	1	1	0.006	0.006	0.006
	Normal control 2	hsa-miR-506-001050	0	0	Undetermined				0.129
	Normal control 2	hsa-miR-92b#-002343	0.793	0.223	36.453	36.453	36.453	20.631	0.04	1	1	1	0	0	0
	Normal control 2	hsa-miR-9#-002231	1.438	0.978	31.404	31.404	31.404	15.582	0.256	1	1	1	0.228	0.228	0.228
	Normal control 2	hsa-miR-138-2#-002144	0	0	Undetermined				0.04
	Normal control 2	hsa-miR-369-3p-000557	0	0	Undetermined				0.04
	Normal control 2	hsa-miR-548I-002909	0	0	Undetermined				0.092
	Normal control 2	hsa-miR-1274A-002883	1.448	0.949	18.607	18.607	18.607	2.786	0.32	1	1	1	0.034	0.034	0.034
	Normal control 2	mmu-miR-187-001193	1.338	0.971	27.342	27.342	27.342	14.094	0.139	1	1	1	0.574	0.574	0.574
	Normal control 2	hsa-miR-769-3p-002003	0	0	Undetermined				0.04
	Normal control 2	hsa-miR-935-002178	0.783	0.235	34.812	34.812	34.812	18.99	0.04	1	1	1
	Normal control 2	hsa-miR-30a-5p-000417	1.512	0.889	20.126	20.126	20.126	4.305	0.316	1	1	1	0.121	0.121	0.121
	Normal control 2	hsa-miR-921-002151	0	0	Undetermined				0.04
	Normal control 2	hsa-miR-558-001526	0	0	Undetermined				0.2
	Normal control 2	hsa-miR-668-001992	0	0	Undetermined				0.04
	Normal control 2	hsa-miR-888#-002213	0	0	Undetermined				0.04
	Normal control 2	hsa-miR-132-000457	1.461	0.979	23.693	23.693	23.693	10.445	0.373	1	1	1	0.175	0.175	0.175
	Normal control 2	hsa-miR-1179-002776	1.428	0.878	29.687	29.687	29.687	13.865	0.04	1	1	1	4.431	4.431	4.431
	Normal control 2	hsa-miR-614-001587	0	0	Undetermined				0.04
	Normal control 2	hsa-miR-1228#-002763	0.822	0.554	24.85	24.85	24.85	9.029	0.04	1	1	1	0.184	0.184	0.184
	Normal control 2	hsa-miR-431-001979	0.927	0.657	25.858	25.858	25.858	12.61	0.05	1	1	1	0.182	0.182	0.182
	Normal control 2	hsa-miR-222#-002097	1.381	0.938	27.49	27.49	27.49	11.668	0.146	1	1	1	0.396	0.396	0.396
	Normal control 2	hsa-miR-519c-001163	0	0	Undetermined				0.04
	Normal control 2	hsa-miR-410-001274	1.428	0.991	29.427	29.427	29.427	16.179	0.112	1	1	1	0.18	0.18	0.18
	Normal control 2	hsa-let-7e#-002407	1.292	0.938	29.053	29.053	29.053	13.231	0.048	1	1	1	3.373	3.373	3.373
	Normal control 2	hsa-miR-143#-002146	0.85	0.636	24.881	24.881	24.881	9.059	0.04	1	1	1	0.006	0.006	0.006
	Normal control 2	hsa-miR-452-002329	1.455	0.993	25.826	25.826	25.826	12.578	0.108	1	1	1	0.093	0.093	0.093
	Normal control 2	hsa-miR-549-001511	0	0	Undetermined				0.04
	Normal control 2	hsa-miR-1227-002769	1.241	0.939	28.297	28.297	28.297	12.476	0.062	1	1	1	0.214	0.214	0.214
	Normal control 2	hsa-miR-25#-002442	0.719	0.533	30.73	30.73	30.73	14.908	0.04	1	1	1	5.218	5.218	5.218
	Normal control 2	hsa-miR-1825-002907	0.96	0.76	23.305	23.305	23.305	7.483	0.04	1	1	1	0.153	0.153	0.153
	Normal control 2	hsa-miR-652-002352	1.403	0.982	26.029	26.029	26.029	12.781	0.243	1	1	1	0.096	0.096	0.096
	Normal control 2	hsa-miR-208-000511	0.763	0.71	28.054	28.054	28.054	14.806	0.04	1	1	1
	Normal control 2	hsa-miR-425#-002302	1.363	0.957	28.22	28.22	28.22	12.398	0.206	1	1	1	0.144	0.144	0.144
	Normal control 2	hsa-miR-199a-000498	1.308	0.972	27.127	27.127	27.127	13.878	0.105	1	1	1	0.06	0.06	0.06
	Normal control 2	hsa-miR-143-002249	1.459	0.983	22.961	22.961	22.961	9.713	0.364	1	1	1	0.068	0.068	0.068
	Normal control 2	hsa-miR-872-002264	0.615	0	Undetermined				0.057
	Normal control 2	hsa-miR-129#-002298	1.056	0.895	33.626	33.626	33.626	17.804	0.069	1	1	1
	Normal control 2	hsa-miR-588-001542	0	0	Undetermined				0.2
	Normal control 2	hsa-miR-193b#-002366	1.251	0.908	26.391	26.391	26.391	10.57	0.052	1	1	1	0.5	0.5	0.5
	Normal control 2	hsa-miR-424-000604	1.427	0.979	29.277	29.277	29.277	16.028	0.244	1	1	1	0.193	0.193	0.193
	Normal control 2	hsa-miR-563-001530	0	0	Undetermined				0.2
	Normal control 2	hsa-miR-381-000571	0	0	Undetermined				0.042
	Normal control 2	hsa-miR-423-5p-002340	1.276	0.974	26.239	26.239	26.239	12.991	0.093	1	1	1	0.429	0.429	0.429
	Normal control 2	hsa-miR-886-5p-002193	1.343	0.547	19.443	19.443	19.443	6.194	0.07	1	1	1	0.121	0.121	0.121
	Normal control 2	hsa-let-7g-002282	1.485	0.986	21.379	21.379	21.379	8.131	0.309	1	1	1	0.158	0.158	0.158
	Normal control 2	hsa-miR-23b#-002126	0.973	0.649	28.786	28.786	28.786	12.964	0.04	1	1	1
	Normal control 2	hsa-miR-125a-5p-002198	1.413	0.956	22.268	22.268	22.268	9.019	0.192	1	1	1	0.696	0.696	0.696
	Normal control 2	hsa-miR-219-2-3p-002390	0	0	Undetermined				0.2
	Normal control 2	hsa-miR-31#-002113	1.273	0.963	30.259	30.259	30.259	14.437	0.124	1	1	1	0.049	0.049	0.049
	Normal control 2	hsa-miR-30d-000420	1.338	0.801	21.52	21.52	21.52	5.698	0.153	1	1	1	0.323	0.323	0.323
	Normal control 2	hsa-miR-197-000497	1.178	0.689	21.201	21.201	21.201	7.953	0.064	1	1	1	4.255	4.255	4.255
	Normal control 2	mmu-miR-451-001141	1.477	0.957	25.943	25.943	25.943	12.695	0.31	1	1	1	0.05	0.05	0.05
	Normal control 2	hsa-miR-218-000521	1.485	0.962	25.241	25.241	25.241	11.993	0.324	1	1	1	0.019	0.019	0.019
	Normal control 2	mmu-miR-134-001186	1.155	0.982	24.259	24.259	24.259	11.011	0.068	1	1	1	0.176	0.176	0.176
	Normal control 2	hsa-miR-545#-002266	1.142	0.879	35.403	35.403	35.403	19.581	0.104	1	1	1	1.49	1.49	1.49
	Normal control 2	hsa-miR-17#-002421	1.325	0.954	26.545	26.545	26.545	10.723	0.15	1	1	1	0.655	0.655	0.655
	Normal control 2	hsa-miR-28-000411	1.422	0.974	23.772	23.772	23.772	10.524	0.299	1	1	1	0.263	0.263	0.263
	Normal control 2	hsa-miR-572-001614	1.248	0.928	29.178	29.178	29.178	13.356	0.09	1	1	1	0.149	0.149	0.149
	Normal control 2	hsa-miR-1253-002894	0.778	0.738	31.376	31.376	31.376	15.554	0.04	1	1	1	0.173	0.173	0.173
	Normal control 2	hsa-miR-620-002672	0	0	Undetermined				0.04
	Normal control 2	hsa-miR-767-3p-001995	0	0	Undetermined				0.119
	Normal control 2	hsa-miR-616-002414	1.405	0.976	27.13	27.13	27.13	13.881	0.061	1	1	1	1.372	1.372	1.372
	Normal control 2	hsa-miR-1284-002903	0	0	Undetermined				0.057
	Normal control 2	hsa-miR-885-3p-002372	1.057	0.867	26.237	26.237	26.237	12.989	0.04	1	1	1	0.165	0.165	0.165
	Normal control 2	hsa-miR-518a-5p-002396	0	0	Undetermined				0.2
	Normal control 2	hsa-miR-34a#-002316	1.449	0.986	25.593	25.593	25.593	9.771	0.342	1	1	1	0.093	0.093	0.093
	Normal control 2	hsa-miR-412-001023	0.648	0.451	31.53	31.53	31.53	18.282	0.04	1	1	1	0.022	0.022	0.022
	Normal control 2	RNU44-001094	1.268	0.078	13.248	14.535	14.535		0.045
	Normal control 2	RNU44-001094	1.243	0.664	15.822	14.535	14.535		0.045
	Normal control 2	hsa-miR-200c-002300	1.193	0.921	22.705	22.705	22.705	9.456	0.079	1	1	1	0.052	0.052	0.052
	Normal control 2	hsa-miR-22-000398	1.259	0.937	22.276	22.276	22.276	9.027	0.1	1	1	1	0.033	0.033	0.033
	Normal control 2	hsa-miR-634-001576	0	0	Undetermined				0.2
	Normal control 2	hsa-miR-591-001545	0	0	Undetermined				0.071
	Normal control 2	hsa-miR-302c#-000534	0	0	Undetermined				0.04
	Normal control 2	hsa-let-7a#-002307	1.023	0.952	28.993	28.993	28.993	13.171	0.04	1	1	1	0.139	0.139	0.139
	Normal control 2	hsa-miR-608-001571	0	0	Undetermined				0.067
	Normal control 2	hsa-miR-200a-000502	1.507	0.992	23.477	23.477	23.477	10.228	0.172	1	1	1	0.051	0.051	0.051
	Normal control 2	hsa-miR-505-002089	1.334	0.988	26.918	26.918	26.918	13.669	0.105	1	1	1	0.182	0.182	0.182
	Normal control 2	hsa-miR-216b-002326	1.405	0.966	28.161	28.161	28.161	14.912	0.154	1	1	1	0.412	0.412	0.412
	Normal control 2	hsa-miR-744-002324	1.503	0.973	24.99	24.99	24.99	11.741	0.379	1	1	1	0.208	0.208	0.208
	Normal control 2	hsa-miR-1250-002887	0	0	Undetermined				0.04
	Normal control 2	hsa-miR-136-000592	1.248	0.949	33.338	33.338	33.338	20.09	0.087	1	1	1	0.184	0.184	0.184
	Normal control 2	hsa-miR-432#-001027	0.766	0.619	29.758	29.758	29.758	13.936	0.04	1	1	1	0.877	0.877	0.877
	Normal control 2	hsa-miR-16-2#-002171	0	0	Undetermined				0.04
	Normal control 2	hsa-miR-130b-000456	1.32	0.97	25.068	25.068	25.068	11.819	0.164	1	1	1	0.547	0.547	0.547
	Normal control 2	hsa-miR-339-5p-002257	1.125	0.899	24.774	24.774	24.774	11.525	0.075	1	1	1	0.144	0.144	0.144
	Normal control 2	hsa-miR-18a#-002423	1.363	0.983	28.299	28.299	28.299	12.477	0.111	1	1	1	0.752	0.752	0.752
	Normal control 2	hsa-miR-1262-002852	0.842	0.594	33.292	33.292	33.292	17.47	0.042	1	1	1	0.032	0.032	0.032
	Normal control 2	hsa-miR-373-000561	0	0	Undetermined				0.071
	Normal control 2	hsa-miR-182-002334	1.372	0.955	33.635	33.635	33.635	20.387	0.239	1	1	1	0.304	0.304	0.304
	Normal control 2	mmu-miR-124a-001182	0.967	0.378	26.227	26.227	26.227	12.979	0.04	1	1	1	2.385	2.385	2.385
	Normal control 2	hsa-miR-155-002623	1.503	0.985	21.856	21.856	21.856	8.607	0.354	1	1	1	0.083	0.083	0.083
	Normal control 2	hsa-miR-20a#-002437	1.477	0.993	28.289	28.289	28.289	12.467	0.287	1	1	1	0.379	0.379	0.379
	Normal control 2	hsa-miR-1278-002851	1.43	0.937	35.468	35.468	35.468	19.646	0.297	1	1	1
	Normal control 2	hsa-miR-1275-002840	1.144	0.743	22.826	22.826	22.826	7.005	0.04	1	1	1	0.207	0.207	0.207
	Normal control 2	RNU48-001006	1.349	0.795	15.028	15.208	15.208	0.673	0.172	1	1	1	0.655	0.655	0.655
	Normal control 2	RNU48-001006	1.355	0.818	15.389	15.208	15.208	0.673	0.172	1	1	1	0.655	0.655	0.655
	Normal control 2	hsa-miR-512-5p-001145	0.569	0.604	31.015	31.015	31.015	17.767	0.04	1	1	1	0	0	0
	Normal control 2	hsa-miR-552-001520	0	0	Undetermined				0.1
	Normal control 2	hsa-miR-376a-000565	1.402	0.984	27.473	27.473	27.473	14.224	0.297	1	1	1	0.078	0.078	0.078
	Normal control 2	hsa-miR-500-002428	1.45	0.984	27.249	27.249	27.249	14	0.238	1	1	1	0.179	0.179	0.179
	Normal control 2	hsa-miR-139-3p-002313	1.227	0.781	23.115	23.115	23.115	9.866	0.04	1	1	1	0.588	0.588	0.588
	Normal control 2	hsa-miR-939-002182	0.873	0.543	25.933	25.933	25.933	10.111	0.04	1	1	1	0.039	0.039	0.039
	Normal control 2	hsa-miR-152-000475	1.512	0.993	22.989	22.989	22.989	9.741	0.222	1	1	1	0.143	0.143	0.143
	Normal control 2	hsa-miR-513C-002756	0	0	Undetermined				0.04
	Normal control 2	hsa-miR-644-001596	0.702	0.454	32.65	32.65	32.65	16.828	0.04	1	1	1	0.013	0.013	0.013
	Normal control 2	hsa-miR-19a-000395	1.323	0.962	25.564	25.564	25.564	12.315	0.238	1	1	1	0.236	0.236	0.236
	Normal control 2	hsa-miR-191#-002678	1.421	0.964	28.998	28.998	28.998	13.176	0.174	1	1	1	182.236	182.236	182.236
	Normal control 2	hsa-miR-635-001578	1.453	0.987	31.392	31.392	31.392	15.57	0.165	1	1	1	0.476	0.476	0.476
	Normal control 2	hsa-miR-150-000473	1.435	0.979	18.787	18.787	18.787	5.538	0.292	1	1	1	0.086	0.086	0.086
	Normal control 2	hsa-miR-129-000590	0	0	Undetermined				0.115
	Normal control 2	hsa-miR-548b-001541	1.021	0.917	31.921	31.921	31.921	18.673	0.052	1	1	1	0	0	0
	Normal control 2	hsa-miR-124#-002197	0	0	Undetermined				0.04
	Normal control 2	hsa-miR-548c-5p-002429	1.296	0.947	31.258	31.258	31.258	18.01	0.077	1	1	1	2.723	2.723	2.723
	Normal control 2	hsa-miR-219-1-3p-002095	1.109	0.898	31.755	31.755	31.755	18.507	0.075	1	1	1	0.511	0.511	0.511
	Normal control 2	hsa-miR-99b-000436	1.168	0.858	22.634	22.634	22.634	9.386	0.074	1	1	1	0.321	0.321	0.321
	Normal control 2	hsa-miR-21#-002438	1.424	0.946	25.691	25.691	25.691	9.87	0.266	1	1	1	0.047	0.047	0.047
	Normal control 2	hsa-miR-218-1#-002094	0	0	Undetermined				0.044
	Normal control 2	hsa-miR-147-000469	0	0	Undetermined				0.042
	Normal control 2	hsa-miR-10a-000387	1.373	0.715	21.913	21.913	21.913	8.664	0.194	1	1	1	0.705	0.705	0.705
	Normal control 2	hsa-miR-298-002190	0	0	Undetermined				0.04
	Normal control 2	hsa-miR-452#-002330	0	0	Undetermined				0.04
	Normal control 2	hsa-miR-125a-3p-002199	1.442	0.962	27.517	27.517	27.517	14.268	0.145	1	1	1	0.187	0.187	0.187
	Normal control 2	hsa-miR-802-002004	0	0	Undetermined				0.04
	Normal control 2	hsa-miR-331-5p-002233	1.258	0.949	28.373	28.373	28.373	15.125	0.184	1	1	1	0.043	0.043	0.043
	Normal control 2	hsa-miR-20a-000580	1.341	0.615	18.475	18.475	18.475	5.226	0.167	1	1	1	0.778	0.778	0.778
	Normal control 2	hsa-miR-490-001037	0.967	0.871	30.289	30.289	30.289	17.041	0.04	1	1	1	0	0	0
	Normal control 2	hsa-miR-509-3-5p-002155	0	0	Undetermined				0.04
	Normal control 2	mmu-miR-379-001138	1.481	0.984	25.724	25.724	25.724	12.475	0.096	1	1	1	0.271	0.271	0.271
	Normal control 2	hsa-miR-524-5p-001982	0	0	Undetermined				0.2
	Normal control 2	hsa-miR-374a#-002125	1.433	0.955	33.166	33.166	33.166	17.344	0.215	1	1	1
	Normal control 2	mmu-miR-137-001129	0.532	0	Undetermined				0.258
	Normal control 2	hsa-miR-1260-002896	1.344	0.941	20.417	20.417	20.417	4.595	0.187	1	1	1	0.138	0.138	0.138
	Normal control 2	hsa-miR-220-000523	0	0	Undetermined				0.04
	Normal control 2	hsa-miR-335#-002185	1.322	0.902	26.601	26.601	26.601	10.779	0.078	1	1	1	0.094	0.094	0.094
	Normal control 2	hsa-miR-330-5p-002230	0.942	0.793	29.181	29.181	29.181	15.933	0.04	1	1	1	0.07	0.07	0.07
	Normal control 2	hsa-miR-511-001111	1.509	0.972	27.014	27.014	27.014	13.765	0.373	1	1	1	0.608	0.608	0.608
	Normal control 2	hsa-miR-107-000443	1.267	0.743	25.43	25.43	25.43	12.182	0.079	1	1	1	0.941	0.941	0.941
	Normal control 2	hsa-miR-30c-1#-002108	0.967	0.728	30.377	30.377	30.377	14.555	0.04	1	1	1	0	0	0
	Normal control 2	hsa-miR-1-002222	1.419	0.913	29.753	29.753	29.753	16.504	0.052	1	1	1	0.001	0.001	0.001
	Normal control 2	hsa-miR-199b-000500	1.184	0.92	29.002	29.002	29.002	15.753	0.063	1	1	1	0.037	0.037	0.037
	Normal control 2	hsa-miR-203-000507	1.44	0.964	24.414	24.414	24.414	11.166	0.321	1	1	1	0.253	0.253	0.253
	Normal control 2	hsa-miR-646-001599	0.573	0.233	33.5	33.5	33.5	17.679	0.04	1	1	1	0	0	0
	Normal control 2	hsa-miR-556-3p-002345	0.596	0	Undetermined				0.211
	Normal control 2	hsa-miR-555-001523	0	0	Undetermined				0.061
	Normal control 2	hsa-miR-708-002341	1.498	0.972	30.532	30.532	30.532	17.284	0.385	1	1	1	0.028	0.028	0.028
	Normal control 2	hsa-miR-636-002088	1.26	0.956	30.096	30.096	30.096	16.848	0.048	1	1	1	0.024	0.024	0.024
	Normal control 2	hsa-miR-337-3p-002157	1.176	0.847	29.768	29.768	29.768	13.946	0.04	1	1	1
	Normal control 2	hsa-miR-296-3p-002101	0	0	Undetermined				0.061
	Normal control 2	hsa-miR-770-5p-002002	1.023	0.811	29.338	29.338	29.338	13.517	0.04	1	1	1	0.021	0.021	0.021
	Normal control 2	hsa-miR-34a-000426	1.472	0.98	23.486	23.486	23.486	10.238	0.364	1	1	1	0.084	0.084	0.084
	Normal control 2	hsa-miR-484-001821	1.484	0.991	18.226	18.226	18.226	4.977	0.274	1	1	1	0.79	0.79	0.79
	Normal control 2	hsa-miR-186#-002105	0.853	0.728	32.29	32.29	32.29	16.468	0.049	1	1	1	0.008	0.008	0.008
	Normal control 2	hsa-miR-720-002895	1.432	0.98	12.806	12.806	12.806	-3.016	0.237	1	1	1	0.247	0.247	0.247
	Normal control 2	hsa-miR-377#-002128	1.036	0.881	30.53	30.53	30.53	14.708	0.04	1	1	1	0	0	0
	Normal control 2	hsa-miR-485-5p-001036	0.732	0.745	29.571	29.571	29.571	16.322	0.04	1	1	1	0.096	0.096	0.096
	Normal control 2	hsa-miR-517#-001113	0.718	0.702	34.653	34.653	34.653	18.831	0.04	1	1	1	0.02	0.02	0.02
	Normal control 2	hsa-miR-182#-000483	0	0	Undetermined				0.04
	Normal control 2	hsa-miR-1304-002874	0.756	0.697	30.384	30.384	30.384	14.562	0.04	1	1	1	0.042	0.042	0.042
	Normal control 2	hsa-miR-33a#-002136	1.449	0.988	28.141	28.141	28.141	12.32	0.201	1	1	1	0.314	0.314	0.314
	Normal control 2	hsa-miR-924-002154	0	0	Undetermined				0.2
	Normal control 2	hsa-miR-550-001544	1.297	0.891	30.406	30.406	30.406	14.584	0.086	1	1	1	0.227	0.227	0.227
	Normal control 2	hsa-miR-1302-002901	0	0	Undetermined				0.04
	Normal control 2	hsa-miR-585-001625	0.47	0	Undetermined				0.04
	Normal control 2	hsa-miR-551b#-002346	1.208	0.889	32.632	32.632	32.632	16.81	0.04	1	1	1
	Normal control 2	mmu-miR-93-001090	1.534	0.984	23.018	23.018	23.018	9.769	0.459	1	1	1	0.221	0.221	0.221
	Normal control 2	hsa-miR-518a-3p-002397	0.527	0	Undetermined				0.08
	Normal control 2	hsa-miR-27b#-002174	1.232	0.938	25.55	25.55	25.55	9.728	0.107	1	1	1	0.918	0.918	0.918
	Normal control 2	hsa-miR-589-002409	0	0	Undetermined				0.056
	Normal control 2	hsa-miR-542-5p-002240	1.386	0.976	27.201	27.201	27.201	13.952	0.09	1	1	1	0.181	0.181	0.181
	Normal control 2	hsa-miR-220c-002211	0	0	Undetermined				0.04
	Normal control 2	hsa-miR-302c-000533	0	0.241	30.383	30.383	30.383	17.134	0.04	1	1	1	0.001	0.001	0.001
	Normal control 2	hsa-miR-518d-5p-002389	0	0	Undetermined				0.054
	Normal control 2	hsa-miR-486-001278	1.3	0.974	28.876	28.876	28.876	15.627	0.075	1	1	1	0.028	0.028	0.028
	Normal control 2	hsa-miR-432-001026	1.537	0.983	27.804	27.804	27.804	11.982	0.403	1	1	1	0.183	0.183	0.183
	Normal control 2	hsa-miR-520D-3P-002743	1.549	0.95	32.179	32.179	32.179	16.358	0.118	1	1	1	0	0	0
	Normal control 2	hsa-miR-200b-002251	1.334	0.883	22.109	22.109	22.109	8.861	0.074	1	1	1	0.093	0.093	0.093
	Normal control 2	hsa-miR-583-001623	0	0	Undetermined				0.04
	Normal control 2	hsa-miR-454#-001996	1.315	0.918	29.29	29.29	29.29	13.468	0.112	1	1	1	101.255	101.255	101.255
	Normal control 2	hsa-miR-548d-5p-002237	1.173	0.939	29.845	29.845	29.845	16.597	0.074	1	1	1	0.004	0.004	0.004
	Normal control 2	hsa-miR-135a-000460	1.368	0.977	32.85	32.85	32.85	19.601	0.165	1	1	1	0.017	0.017	0.017
	Normal control 2	hsa-miR-29a-002112	1.521	0.974	19.985	19.985	19.985	6.736	0.364	1	1	1	0.084	0.084	0.084
	Normal control 2	hsa-miR-148b-000471	1.148	0.92	26.662	26.662	26.662	13.414	0.076	1	1	1	0.162	0.162	0.162
	Normal control 2	hsa-miR-1184-002842	0	0	Undetermined				0.113
	Normal control 2	hsa-miR-542-3p-001284	1.367	0.938	32.457	32.457	32.457	19.209	0.125	1	1	1	5.506	5.506	5.506
	Normal control 2	hsa-miR-586-001539	0	0	Undetermined				0.057
	Normal control 2	mmu-let-7d#-001178	0	0	Undetermined				0.04
	Normal control 2	hsa-miR-503-001048	0.745	0.742	30.215	30.215	30.215	16.967	0.04	1	1	1	0	0	0
	Normal control 2	hsa-miR-548P-002798	0	0	Undetermined				0.104
	Normal control 2	hsa-miR-922-002152	1.234	0.883	31.329	31.329	31.329	15.508	0.074	1	1	1	0.222	0.222	0.222
	Normal control 2	hsa-miR-376b-001102	0	0	Undetermined				0.04
	Normal control 2	hsa-miR-532-001518	1.483	0.985	23.419	23.419	23.419	10.171	0.347	1	1	1	0.17	0.17	0.17
	Normal control 2	hsa-miR-29a#-002447	1.419	0.97	27.712	27.712	27.712	11.89	0.156	1	1	1	0.344	0.344	0.344
	Normal control 2	hsa-miR-181c-000482	1.136	0.919	30.466	30.466	30.466	17.217	0.08	1	1	1	0.144	0.144	0.144
	Normal control 2	hsa-miR-132#-002132	1.258	0.904	32.338	32.338	32.338	16.516	0.066	1	1	1	0.082	0.082	0.082
	Normal control 2	hsa-miR-409-3p-002332	1.47	0.985	23.028	23.028	23.028	7.207	0.283	1	1	1	0.255	0.255	0.255
	Normal control 2	hsa-miR-499-3p-002427	0	0.229	36.679	36.679	36.679	23.431	0.04	1	1	1
	Normal control 2	hsa-miR-628-3p-002434	1.385	0.988	27.5	27.5	27.5	11.678	0.115	1	1	1	0.133	0.133	0.133
	Normal control 2	hsa-miR-548a-5p-002412	0	0	Undetermined				0.04
	Normal control 2	hsa-miR-886-3p-002194	1.33	0.64	20.24	20.24	20.24	6.992	0.062	1	1	1	0.648	0.648	0.648
	Normal control 2	hsa-miR-656-001510	1.226	0.969	29.659	29.659	29.659	13.837	0.072	1	1	1	0.098	0.098	0.098
	Normal control 2	hsa-miR-367-000555	0	0	Undetermined				0.04
	Normal control 2	hsa-miR-369-5p-001021	1.433	0.977	30.307	30.307	30.307	17.058	0.072	1	1	1	2.306	2.306	2.306
	Normal control 2	hsa-miR-18b#-002310	0	0	Undetermined				0.04
	Normal control 2	hsa-miR-376a#-002127	1.24	0.745	33.519	33.519	33.519	17.697	0.04	1	1	1	3.046	3.046	3.046
	Normal control 2	hsa-miR-378-002243	1.502	0.578	18.32	18.32	18.32	2.498	0.141	1	1	1	0	0	0
	Normal control 2	hsa-miR-642-001592	1.401	0.975	31.551	31.551	31.551	18.302	0.259	1	1	1	0.097	0.097	0.097
	Normal control 2	hsa-miR-302a#-002381	0	0	Undetermined				0.04
	Normal control 2	hsa-miR-1203-002877	0.77	0.759	30.349	30.349	30.349	14.527	0.04	1	1	1	0.415	0.415	0.415
	Normal control 2	hsa-miR-320-002277	1.487	0.991	19.768	19.768	19.768	6.52	0.311	1	1	1	0.18	0.18	0.18
	Normal control 2	hsa-miR-331-000545	1.358	0.895	20.183	20.183	20.183	6.935	0.2	1	1	1	0.25	0.25	0.25
	Normal control 2	hsa-miR-302d-000535	0	0	Undetermined				0.049
	Normal control 2	hsa-miR-1272-002845	0	0	Undetermined				0.084
	Normal control 2	hsa-miR-1248-002870	1.463	0.978	27.489	27.489	27.489	11.667	0.341	1	1	1	0.173	0.173	0.173
	Normal control 2	hsa-miR-29b-1#-002165	1.161	0.941	29.219	29.219	29.219	13.398	0.068	1	1	1	2.625	2.625	2.625
	Normal control 2	hsa-miR-22#-002301	1.299	0.924	25.372	25.372	25.372	9.55	0.101	1	1	1	5.388	5.388	5.388
	Normal control 2	hsa-miR-1270-002807	1.296	0.988	30.913	30.913	30.913	15.091	0.111	1	1	1	0.66	0.66	0.66
	Normal control 2	hsa-miR-105-002167	0	0	Undetermined				0.063
	Normal control 2	hsa-miR-92a-000431	1.42	0.979	21.168	21.168	21.168	7.919	0.193	1	1	1	0.674	0.674	0.674
	Normal control 2	hsa-miR-519d-002403	0.681	0	Undetermined				0.194
	Normal control 2	hsa-miR-766-001986	1.233	0.874	24.045	24.045	24.045	8.223	0.078	1	1	1	0.397	0.397	0.397
	Normal control 2	hsa-miR-126-002228	1.427	0.926	15.493	15.493	15.493	2.245	0.179	1	1	1	0.263	0.263	0.263
	Normal control 2	hsa-miR-151-5P-002642	1.381	0.958	23.225	23.225	23.225	7.404	0.236	1	1	1	0.349	0.349	0.349
	Normal control 2	hsa-miR-1205-002778	0	0	Undetermined				0.04
	Normal control 2	hsa-miR-1252-002860	0	0	Undetermined				0.2
	Normal control 2	hsa-miR-195#-002107	0.803	0.489	28.587	28.587	28.587	12.765	0.04	1	1	1	0.011	0.011	0.011
	Normal control 2	hsa-miR-125b-000449	1.363	0.91	20.743	20.743	20.743	7.495	0.164	1	1	1	0.134	0.134	0.134
	Normal control 2	hsa-miR-550-002410	1.357	0.953	30.176	30.176	30.176	14.355	0.135	1	1	1	0.907	0.907	0.907
	Normal control 2	hsa-miR-299-3p-001015	0.55	0.177	34.968	34.968	34.968	21.719	0.069	1	1	1
	Normal control 2	hsa-miR-660-001515	1.429	0.985	23.926	23.926	23.926	10.678	0.27	1	1	1	0.113	0.113	0.113
	Normal control 2	hsa-miR-501-001047	1.285	0.967	26.1	26.1	26.1	12.852	0.06	1	1	1	0.158	0.158	0.158
	Normal control 2	hsa-miR-539-001286	1.567	0.989	26.269	26.269	26.269	13.021	0.372	1	1	1	0.202	0.202	0.202
	Normal control 2	hsa-miR-1298-002861	0.75	0.723	27.684	27.684	27.684	11.863	0.04	1	1	1	0.067	0.067	0.067
	Normal control 2	hsa-miR-548L-002904	0	0	Undetermined				0.04
	Normal control 2	hsa-miR-101#-002143	0.921	0.581	31.839	31.839	31.839	16.017	0.04	1	1	1	0.101	0.101	0.101
	Normal control 2	hsa-miR-631-001564	0	0	Undetermined				0.2
	Normal control 2	hsa-miR-16-1#-002420	1.447	0.985	27.479	27.479	27.479	11.657	0.1	1	1	1	0.305	0.305	0.305
	Normal control 2	hsa-miR-449-001030	1.497	0.966	32.335	32.335	32.335	19.087	0.233	1	1	1	0.112	0.112	0.112
	Normal control 2	hsa-miR-185-002271	1.445	0.986	25.697	25.697	25.697	12.448	0.227	1	1	1	0.125	0.125	0.125
	Normal control 2	hsa-miR-551a-001519	0.764	0.528	32.935	32.935	32.935	17.113	0.04	1	1	1	0	0	0
	Normal control 2	hsa-miR-888-002212	0	0	Undetermined				0.04
	Normal control 2	hsa-miR-190b-002263	1.528	0.945	30.188	30.188	30.188	14.366	0.29	1	1	1	0.277	0.277	0.277
	Normal control 2	hsa-miR-324-5p-000539	1.391	0.913	24.75	24.75	24.75	11.502	0.145	1	1	1	0.196	0.196	0.196
	Normal control 2	hsa-miR-106a-002169	1.515	0.982	18.349	18.349	18.349	5.1	0.381	1	1	1	0.249	0.249	0.249
	Normal control 2	hsa-miR-1303-002792	1.15	0.855	27.422	27.422	27.422	11.6	0.072	1	1	1	0.163	0.163	0.163
	Normal control 2	hsa-miR-1183-002841	1.143	0.798	30.293	30.293	30.293	14.472	0.066	1	1	1	0.068	0.068	0.068
	Normal control 2	hsa-miR-202-002363	0.843	0.548	28.78	28.78	28.78	15.531	0.045	1	1	1	2.513	2.513	2.513
	Normal control 2	hsa-miR-641-001585	0	0	Undetermined				0.056
	Normal control 2	hsa-miR-320B-002844	1.42	0.935	26.535	26.535	26.535	10.713	0.189	1	1	1	0.23	0.23	0.23
	Normal control 2	hsa-miR-510-002241	0	0	Undetermined				0.04
	Normal control 2	hsa-miR-593-001547	0.868	0.895	27.611	27.611	27.611	11.789	0.04	1	1	1
	Normal control 2	hsa-miR-205-000509	0	0	Undetermined				0.04
	Normal control 2	hsa-miR-1285-002822	1.209	0.845	24.571	24.571	24.571	8.749	0.04	1	1	1	0.862	0.862	0.862
	Normal control 2	hsa-miR-1178-002777	0.419	0.116	16.037	16.037	16.037	0.215	0.04	1	1	1	41,948.035	41,948.035	41,948.035
	Normal control 2	hsa-miR-564-001531	1.206	0.956	27.979	27.979	27.979	12.157	0.063	1	1	1
	Normal control 2	hsa-miR-525-001174	0	0	Undetermined				0.108
	Normal control 2	hsa-let-7c-000379	1.444	0.974	22.908	22.908	22.908	9.659	0.26	1	1	1	0.526	0.526	0.526
	Normal control 2	hsa-miR-1224-3P-002752	0	0	Undetermined				0.2
	Normal control 2	hsa-miR-1245-002823	0	0	Undetermined				0.056
	Normal control 2	hsa-miR-579-002398	1.414	0.971	28.797	28.797	28.797	15.549	0.126	1	1	1
	Normal control 2	hsa-miR-99a-000435	1.241	0.824	20.573	20.573	20.573	7.325	0.118	1	1	1	0.226	0.226	0.226
	Normal control 2	hsa-miR-130a#-002131	1.437	0.955	31.545	31.545	31.545	15.724	0.167	1	1	1	0.057	0.057	0.057
	Normal control 2	hsa-miR-487a-001279	1.171	0.956	29.502	29.502	29.502	16.253	0.04	1	1	1	2.029	2.029	2.029
	Normal control 2	hsa-miR-873-002356	0	0	Undetermined				0.174
	Normal control 2	hsa-miR-653-002292	0	0	Undetermined				0.04
	Normal control 2	hsa-miR-32#-002111	0	0	Undetermined				0.04
	Normal control 2	hsa-miR-135b#-002159	0	0	Undetermined				0.04
	Normal control 2	hsa-miR-342-5p-002147	1.109	0.603	26.388	26.388	26.388	13.14	0.058	1	1	1	0.001	0.001	0.001
	Normal control 2	hsa-miR-1274B-002884	1.42	0.958	11.577	11.577	11.577	-4.245	0.253	1	1	1	0.383	0.383	0.383
	Normal control 2	hsa-miR-624-002430	0	0	Undetermined				0.2
	Normal control 2	hsa-miR-557-001525	0	0	Undetermined				0.04
	Normal control 2	hsa-miR-302b-000531	0.693	0.304	30.621	30.621	30.621	17.373	0.07	1	1	1
	Normal control 2	hsa-miR-891a-002191	1.193	0.915	33.314	33.314	33.314	20.066	0.102	1	1	1	0.138	0.138	0.138
	Normal control 2	mmu-miR-499-001352	0	0	Undetermined				0.08
	Normal control 2	hsa-miR-933-002176	0	0	Undetermined				0.2
	Normal control 2	hsa-miR-15b-000390	1.364	0.963	23.046	23.046	23.046	9.797	0.251	1	1	1	0.722	0.722	0.722
	Normal control 2	hsa-miR-371-3p-002124	1.109	0.731	28.204	28.204	28.204	14.956	0.04	1	1	1
	Normal control 2	hsa-miR-601-001558	1.457	0.962	30.086	30.086	30.086	14.264	0.255	1	1	1	0.179	0.179	0.179
	Normal control 2	hsa-miR-15a#-002419	1.449	0.957	28.39	28.39	28.39	12.568	0.244	1	1	1	0.514	0.514	0.514
	Normal control 2	hsa-miR-98-000577	0.823	0.658	23.906	23.906	23.906	10.657	0.04	1	1	1	0.16	0.16	0.16
	Normal control 2	hsa-miR-665-002681	0	0	Undetermined				0.04
	Normal control 2	hsa-miR-424#-002309	1.423	0.95	26.302	26.302	26.302	10.48	0.132	1	1	1	2.038	2.038	2.038
	Normal control 2	hsa-miR-571-001613	0.966	0.807	28.872	28.872	28.872	13.05	0.04	1	1	1	0.025	0.025	0.025
	Normal control 2	hsa-miR-502-001109	1.213	0.971	30.394	30.394	30.394	17.146	0.081	1	1	1	0.056	0.056	0.056
	Normal control 2	hsa-miR-23b-000400	1.168	0.379	21.229	21.229	21.229	7.981	0.04	1	1	1	1.216	1.216	1.216
	Normal control 2	hsa-miR-27b-000409	1.51	0.991	23.96	23.96	23.96	10.711	0.352	1	1	1	0.194	0.194	0.194
	Normal control 2	hsa-miR-617-001591	1.095	0.926	32.626	32.626	32.626	16.805	0.1	1	1	1	0.156	0.156	0.156
	Normal control 2	hsa-miR-584-001624	0.764	0.603	34.046	34.046	34.046	18.225	0.04	1	1	1	0	0	0
	Normal control 2	hsa-miR-186-002285	1.536	0.985	21.611	21.611	21.611	8.362	0.362	1	1	1	0.191	0.191	0.191
	Normal control 2	hsa-miR-520e-001119	0	0	Undetermined				0.04
	Normal control 2	hsa-miR-623-001555	0.882	0.438	33.935	33.935	33.935	18.113	0.04	1	1	1
	Normal control 2	hsa-miR-582-5p-001983	0	0	Undetermined				0.099
	Normal control 2	hsa-miR-524-001173	0.647	0.132	33.964	33.964	33.964	18.142	0.059	1	1	1
	Normal control 2	hsa-miR-144#-002148	1.481	0.939	29.123	29.123	29.123	13.302	0.246	1	1	1	0.291	0.291	0.291
	Normal control 2	hsa-miR-324-3p-002161	1.398	0.98	24.968	24.968	24.968	11.72	0.299	1	1	1	0.256	0.256	0.256
	Normal control 2	hsa-miR-221#-002096	0	0	Undetermined				0.062
	Normal control 2	hsa-miR-339-3p-002184	1.342	0.972	25.409	25.409	25.409	12.161	0.196	1	1	1	0.149	0.149	0.149
	Normal control 2	hsa-miR-377-000566	0	0.486	33.606	33.606	33.606	20.358	0.045	1	1	1
	Normal control 2	hsa-miR-553-001521	0	0	Undetermined				0.046
	Normal control 2	hsa-miR-33a-002135	1.045	0.944	30.594	30.594	30.594	14.772	0.04	1	1	1	0.067	0.067	0.067
	Normal control 2	hsa-miR-329-001101	1.395	0.947	32.506	32.506	32.506	19.258	0.11	1	1	1	7.665	7.665	7.665
	Normal control 2	hsa-miR-194-000493	1.454	0.802	18.53	18.53	18.53	5.281	0.125	1	1	1	0.393	0.393	0.393
	Normal control 2	hsa-miR-887-002374	0.703	0.768	30.066	30.066	30.066	16.817	0.04	1	1	1	0.213	0.213	0.213
	Normal control 2	hsa-miR-106b#-002380	1.262	0.839	26.635	26.635	26.635	10.814	0.18	1	1	1	0.12	0.12	0.12
	Normal control 2	hsa-miR-122#-002130	1.498	0.979	27.267	27.267	27.267	11.445	0.23	1	1	1	6.8	6.8	6.8
	Normal control 2	hsa-miR-422a-002297	1.478	0.975	28.311	28.311	28.311	15.063	0.126	1	1	1	0.323	0.323	0.323
	Normal control 2	hsa-miR-664-002897	1.348	0.848	21.99	21.99	21.99	6.168	0.163	1	1	1	0.324	0.324	0.324
	Normal control 2	hsa-miR-548K-002819	0	0	Undetermined				0.199
	Normal control 2	hsa-miR-597-001551	1.378	0.952	29.51	29.51	29.51	16.262	0.095	1	1	1
	Normal control 2	hsa-miR-92a-1#-002137	1.499	0.98	28.786	28.786	28.786	12.964	0.191	1	1	1	0.552	0.552	0.552
	Normal control 2	hsa-miR-301b-002392	1.404	0.961	30.304	30.304	30.304	17.056	0.115	1	1	1	2.834	2.834	2.834
	Normal control 2	hsa-miR-138-002284	1.529	0.987	27.774	27.774	27.774	14.525	0.2	1	1	1	0.093	0.093	0.093
	Normal control 2	hsa-miR-188-3p-002106	0	0.359	20.814	20.814	20.814	7.566	0.04	1	1	1	0.079	0.079	0.079
	Normal control 2	hsa-miR-516-3p-001149	1.279	0.78	31.426	31.426	31.426	15.605	0.099	1	1	1	0.025	0.025	0.025
	Normal control 2	mmu-miR-615-001960	0	0	Undetermined				0.04
	Normal control 2	hsa-miR-661-001606	0.948	0.835	26.088	26.088	26.088	10.266	0.04	1	1	1	0.123	0.123	0.123
	Normal control 2	hsa-miR-363#-001283	0.442	0.224	32.063	32.063	32.063	16.241	0.04	1	1	1
	Normal control 2	hsa-miR-345-002186	1.511	0.986	23.462	23.462	23.462	10.214	0.38	1	1	1	0.904	0.904	0.904
	Normal control 2	hsa-miR-325-000540	0.537	0.044	15.588	15.588	15.588	2.34	0.04	1	1	1
	Normal control 2	hsa-miR-148a-000470	1.38	0.993	21.974	21.974	21.974	8.725	0.16	1	1	1	0.64	0.64	0.64
	Normal control 2	hsa-miR-576-3p-002351	1.419	0.928	31.542	31.542	31.542	18.294	0.264	1	1	1	0.89	0.89	0.89
	Normal control 2	mmu-miR-495-001663	1.447	0.969	26.845	26.845	26.845	13.596	0.13	1	1	1	0.444	0.444	0.444
	Normal control 2	hsa-miR-26a-000405	1.334	0.891	19.358	19.358	19.358	6.11	0.105	1	1	1	0.424	0.424	0.424
	Normal control 2	hsa-miR-455-3p-002244	1.389	0.992	24.857	24.857	24.857	11.608	0.162	1	1	1	0.698	0.698	0.698
	Normal control 2	hsa-miR-654-001611	0.882	0.398	26.513	26.513	26.513	13.265	0.04	1	1	1	1.051	1.051	1.051
	Normal control 2	hsa-miR-1257-002910	0	0	Undetermined				0.098
	Normal control 2	hsa-miR-662-001607	0.855	0.703	29.84	29.84	29.84	14.018	0.04	1	1	1	0.064	0.064	0.064
	Normal control 2	hsa-miR-522-002413	0	0	Undetermined				0.178
	Normal control 2	hsa-miR-633-001574	0	0	Undetermined				0.079
	Normal control 2	mmu-miR-140-001187	1.502	0.976	22.591	22.591	22.591	9.343	0.354	1	1	1	0.097	0.097	0.097
	Normal control 2	hsa-miR-518d-001159	0	0	Undetermined				0.04
	Normal control 2	hsa-miR-1206-002878	0	0	Undetermined				0.2
	Normal control 2	hsa-miR-562-001529	0.738	0.519	19.225	19.225	19.225	3.403	0.04	1	1	1
	Normal control 2	hsa-miR-520a#-001168	0	0	Undetermined				0.04
	Normal control 2	hsa-miR-1249-002868	0.783	0.889	29.401	29.401	29.401	13.579	0.04	1	1	1	0.302	0.302	0.302
	Normal control 2	hsa-miR-504-002084	1.208	0.777	27.703	27.703	27.703	14.455	0.04	1	1	1
	Normal control 2	hsa-miR-431#-002312	0	0	Undetermined				0.04
	Normal control 2	mmu-miR-496-001953	0	0	Undetermined				0.04
	Normal control 2	hsa-miR-566-001533	0.863	0.519	26.544	26.544	26.544	10.722	0.04	1	1	1	0.111	0.111	0.111
	Normal control 2	hsa-miR-215-000518	0.853	0.301	17.599	17.599	17.599	4.35	0.04	1	1	1	1.284	1.284	1.284
	Normal control 2	hsa-miR-340#-002259	1.457	0.989	26.253	26.253	26.253	10.431	0.298	1	1	1	1.131	1.131	1.131
	Normal control 2	hsa-miR-155#-002287	0	0	Undetermined				0.04
	Normal control 2	hsa-miR-127-5p-002229	0	0	Undetermined				0.04
	Normal control 2	hsa-miR-450a-002303	1.463	0.978	29.536	29.536	29.536	16.288	0.136	1	1	1	0.164	0.164	0.164
	Normal control 2	hsa-miR-130b#-002114	1.068	0.838	26.392	26.392	26.392	10.57	0.04	1	1	1	264.342	264.342	264.342
	Normal control 2	hsa-miR-758-001990	1.308	0.917	29.645	29.645	29.645	16.397	0.064	1	1	1	0.077	0.077	0.077
	Normal control 2	hsa-miR-518e-002395	0.686	0	Undetermined				0.145
	Normal control 2	hsa-miR-544-002265	0	0	Undetermined				0.2
	Normal control 2	hsa-miR-651-001604	0	0	Undetermined				0.155
	Normal control 2	hsa-miR-146b-001097	1.488	0.98	17.045	17.045	17.045	3.797	0.324	1	1	1	0.153	0.153	0.153
	Normal control 2	hsa-miR-556-5p-002344	0	0	Undetermined				0.063
	Normal control 2	hsa-miR-191-002299	1.418	0.926	17.083	17.083	17.083	3.834	0.229	1	1	1	0.36	0.36	0.36
	Normal control 2	hsa-miR-375-000564	1.447	0.947	22.337	22.337	22.337	9.089	0.227	1	1	1	0.449	0.449	0.449
	Normal control 2	hsa-let-7d-002283	1.417	0.942	23.012	23.012	23.012	9.764	0.248	1	1	1	0.381	0.381	0.381
	Normal control 2	hsa-miR-1283-002890	0	0	Undetermined				0.074
	Normal control 2	hsa-miR-144-002676	1.109	0.918	30.301	30.301	30.301	14.479	0.058	1	1	1	0.787	0.787	0.787
	Normal control 2	hsa-miR-19a#-002424	0	0	Undetermined				0.135
	Normal control 2	hsa-miR-146a-000468	1.438	0.989	18.416	18.416	18.416	5.167	0.215	1	1	1	0.175	0.175	0.175
	Normal control 2	hsa-miR-1225-3P-002766	0.827	0.577	27.829	27.829	27.829	12.007	0.04	1	1	1	0	0	0
	Normal control 2	hsa-miR-361-000554	1.35	0.951	26.517	26.517	26.517	13.269	0.179	1	1	1	0.148	0.148	0.148
	Normal control 2	hsa-miR-346-000553	0.684	0.514	28.195	28.195	28.195	14.947	0.04	1	1	1	1.28	1.28	1.28
	Normal control 2	hsa-miR-876-5p-002205	0.584	0.727	31.698	31.698	31.698	18.449	0.04	1	1	1	0.23	0.23	0.23
	Normal control 2	hsa-miR-1269-002789	1.175	0.835	31.249	31.249	31.249	15.427	0.127	1	1	1	1.748	1.748	1.748
	Normal control 2	hsa-miR-1236-002761	0.766	0.684	31.909	31.909	31.909	16.087	0.04	1	1	1
	Normal control 2	hsa-miR-221-000524	1.381	0.986	26.192	26.192	26.192	12.944	0.165	1	1	1	0.175	0.175	0.175
	Normal control 2	hsa-miR-19b-000396	1.292	0.907	18.209	18.209	18.209	4.96	0.166	1	1	1	0.31	0.31	0.31
	Normal control 2	hsa-miR-658-001513	0	0	Undetermined				0.04
	Normal control 2	hsa-miR-1201-002781	1.185	0.711	23.4	23.4	23.4	7.579	0.062	1	1	1	0.349	0.349	0.349
	Normal control 2	hsa-miR-871-002354	0	0	Undetermined				0.2
	Normal control 2	hsa-miR-145-002278	1.309	0.917	18.119	18.119	18.119	4.871	0.165	1	1	1	0.09	0.09	0.09
	Normal control 2	mmu-miR-96-000186	1.391	0.924	33.85	33.85	33.85	20.602	0.19	1	1	1	0.13	0.13	0.13
	Normal control 2	hsa-miR-100#-002142	1.535	0.96	31.287	31.287	31.287	15.465	0.226	1	1	1	0.075	0.075	0.075
	Normal control 2	hsa-miR-383-000573	1.447	0.985	27.431	27.431	27.431	14.183	0.162	1	1	1	1	1	1
	Normal control 2	hsa-miR-1265-002790	0	0	Undetermined				0.2
	Normal control 2	hsa-miR-765-002643	0.88	0.659	30.634	30.634	30.634	14.813	0.04	1	1	1
	Normal control 2	hsa-miR-130a-000454	1.226	0.831	24.394	24.394	24.394	11.146	0.111	1	1	1	0.072	0.072	0.072
	Normal control 2	hsa-miR-648-001601	0	0	Undetermined				0.04
	Normal control 2	hsa-miR-1233-002768	1.059	0.896	22.955	22.955	22.955	7.133	0.04	1	1	1	0.069	0.069	0.069
	Normal control 2	hsa-miR-876-3p-002225	0	0	Undetermined				0.2
	Normal control 2	hsa-miR-548E-002881	0	0.354	26.996	26.996	26.996	11.175	0.045	1	1	1
	Normal control 2	hsa-miR-30a-3p-000416	1.475	0.922	20.767	20.767	20.767	4.945	0.312	1	1	1	0.166	0.166	0.166
	Normal control 2	hsa-miR-106a#-002170	0.478	0.143	18.367	18.367	18.367	2.546	0.04	1	1	1
	Normal control 2	hsa-miR-892b-002214	0.859	0.885	29.696	29.696	29.696	13.874	0.04	1	1	1	0.002	0.002	0.002
	Normal control 2	hsa-miR-302d#-002120	0	0	Undetermined				0.04
	Normal control 2	hsa-miR-125b-1#-002378	1.414	0.99	30.172	30.172	30.172	14.351	0.186	1	1	1	0.067	0.067	0.067
	Normal control 2	hsa-miR-599-001554	0	0	Undetermined				0.04
	Normal control 2	hsa-miR-30c-2#-002110	0.812	0.838	28.558	28.558	28.558	12.736	0.04	1	1	1	0.185	0.185	0.185
	Normal control 2	hsa-miR-519e#-001166	0	0	Undetermined				0.04
	Normal control 2	hsa-miR-1300-002902	1.356	0.99	26.363	26.363	26.363	10.541	0.102	1	1	1	3.919	3.919	3.919
	Normal control 1	hsa-let-7f-2#-002418	1.27	0.951	29.46	29.46	29.46	13.638	0.04	1	1	1	1.093	1.093	1.093
	Normal control 1	hsa-miR-181a-000480	1.17	0.947	24.564	24.564	24.564	11.315	0.082	1	1	1	0.089	0.089	0.089
	Normal control 1	hsa-miR-519b-3p-002384	0.689	0	Undetermined				0.121
	Normal control 1	hsa-miR-19a#-002424	0	0	Undetermined				0.135
	Normal control 1	hsa-miR-887-002374	0.703	0.768	30.066	30.066	30.066	16.817	0.04	1	1	1	0.213	0.213	0.213
	Normal control 1	hsa-miR-19b-1#-002425	1.445	0.981	27.445	27.445	27.445	11.623	0.236	1	1	1	0.209	0.209	0.209
	Normal control 1	hsa-miR-96#-002140	0	0	Undetermined				0.04
	Normal control 1	hsa-miR-450b-5p-002207	1.355	0.926	29.497	29.497	29.497	16.249	0.048	1	1	1	7.146	7.146	7.146
	Normal control 1	hsa-miR-31#-002113	1.273	0.963	30.259	30.259	30.259	14.437	0.124	1	1	1	0.049	0.049	0.049
	Normal control 1	hsa-miR-141-000463	1.449	0.981	29.128	29.128	29.128	15.879	0.135	1	1	1	0.01	0.01	0.01
	Normal control 1	hsa-miR-539-001286	1.567	0.989	26.269	26.269	26.269	13.021	0.372	1	1	1	0.202	0.202	0.202
	Normal control 1	hsa-miR-18b#-002310	0	0	Undetermined				0.04
	Normal control 1	hsa-miR-517b-001152	0.646	0.493	34.393	34.393	34.393	21.144	0.04	1	1	1
	Normal control 1	hsa-miR-886-3p-002194	1.33	0.64	20.24	20.24	20.24	6.992	0.062	1	1	1	0.648	0.648	0.648
	Normal control 1	hsa-miR-548a-001538	0	0	Undetermined				0.167
	Normal control 1	hsa-miR-577-002675	1.437	0.958	33.345	33.345	33.345	17.523	0.227	1	1	1	0.762	0.762	0.762
	Normal control 1	hsa-miR-182#-000483	0	0	Undetermined				0.04
	Normal control 1	hsa-miR-122#-002130	1.498	0.979	27.267	27.267	27.267	11.445	0.23	1	1	1	6.8	6.8	6.8
	Normal control 1	hsa-miR-890-002209	0	0	Undetermined				0.052
	Normal control 1	hsa-miR-548K-002819	0	0	Undetermined				0.199
	Normal control 1	hsa-miR-196b-002215	1.418	0.968	31.189	31.189	31.189	17.941	0.3	1	1	1	0.542	0.542	0.542
	Normal control 1	hsa-miR-493-002364	1.434	0.974	29.321	29.321	29.321	16.072	0.119	1	1	1	0.105	0.105	0.105
	Normal control 1	hsa-miR-99b-000436	1.168	0.858	22.634	22.634	22.634	9.386	0.074	1	1	1	0.321	0.321	0.321
	Normal control 1	hsa-miR-1282-002803	1.189	0.835	29.581	29.581	29.581	13.759	0.048	1	1	1	3.041	3.041	3.041
	Normal control 1	hsa-miR-587-001540	0.628	0	39.45	39.45	39.45	23.629	0.04	1	1	1	0.006	0.006	0.006
	Normal control 1	hsa-miR-145#-002149	1.421	0.933	27.238	27.238	27.238	11.416	0.289	1	1	1	0.153	0.153	0.153
	Normal control 1	hsa-miR-583-001623	0	0	Undetermined				0.04
	Normal control 1	hsa-let-7b#-002404	0.831	0.668	29.112	29.112	29.112	13.29	0.04	1	1	1	0.148	0.148	0.148
	Normal control 1	hsa-miR-145-002278	1.309	0.917	18.119	18.119	18.119	4.871	0.165	1	1	1	0.09	0.09	0.09
	Normal control 1	hsa-miR-1303-002792	1.15	0.855	27.422	27.422	27.422	11.6	0.072	1	1	1	0.163	0.163	0.163
	Normal control 1	hsa-miR-1300-002902	1.356	0.99	26.363	26.363	26.363	10.541	0.102	1	1	1	3.919	3.919	3.919
	Normal control 1	hsa-miR-101#-002143	0.921	0.581	31.839	31.839	31.839	16.017	0.04	1	1	1	0.101	0.101	0.101
	Normal control 1	hsa-miR-1236-002761	0.766	0.684	31.909	31.909	31.909	16.087	0.04	1	1	1
	Normal control 1	hsa-miR-616-002414	1.405	0.976	27.13	27.13	27.13	13.881	0.061	1	1	1	1.372	1.372	1.372
	Normal control 1	hsa-miR-144-002676	1.109	0.918	30.301	30.301	30.301	14.479	0.058	1	1	1	0.787	0.787	0.787
	Normal control 1	hsa-miR-330-5p-002230	0.942	0.793	29.181	29.181	29.181	15.933	0.04	1	1	1	0.07	0.07	0.07
	Normal control 1	hsa-let-7f-1#-002417	0.829	0.673	30.447	30.447	30.447	14.625	0.04	1	1	1	0.546	0.546	0.546
	Normal control 1	hsa-miR-708#-002342	0	0	Undetermined				0.04
	Normal control 1	hsa-miR-27b#-002174	1.232	0.938	25.55	25.55	25.55	9.728	0.107	1	1	1	0.918	0.918	0.918
	Normal control 1	hsa-miR-628-5p-002433	1.551	0.986	27.485	27.485	27.485	14.237	0.464	1	1	1	0.132	0.132	0.132
	Normal control 1	hsa-miR-299-5p-000600	1.124	0.778	28.987	28.987	28.987	15.738	0.051	1	1	1	0	0	0
	Normal control 1	hsa-miR-432#-001027	0.766	0.619	29.758	29.758	29.758	13.936	0.04	1	1	1	0.877	0.877	0.877
	Normal control 1	hsa-miR-1264-002799	0	0	Undetermined				0.04
	Normal control 1	hsa-miR-296-000527	1.137	0.796	29.038	29.038	29.038	15.79	0.05	1	1	1	0.122	0.122	0.122
	Normal control 1	RNU48-001006	1.349	0.795	15.028	15.208	15.208	0.673	0.172	1	1	1	0.655	0.655	0.655
	Normal control 1	RNU48-001006	1.355	0.818	15.389	15.208	15.208	0.673	0.172	1	1	1	0.655	0.655	0.655
	Normal control 1	hsa-miR-22#-002301	1.299	0.924	25.372	25.372	25.372	9.55	0.101	1	1	1	5.388	5.388	5.388
	Normal control 1	hsa-miR-532-001518	1.483	0.985	23.419	23.419	23.419	10.171	0.347	1	1	1	0.17	0.17	0.17
	Normal control 1	hsa-miR-302a-000529	0.521	0	Undetermined				0.042
	Normal control 1	hsa-miR-125a-3p-002199	1.442	0.962	27.517	27.517	27.517	14.268	0.145	1	1	1	0.187	0.187	0.187
	Normal control 1	hsa-miR-485-3p-001277	1.421	0.992	28.965	28.965	28.965	15.716	0.054	1	1	1	0.29	0.29	0.29
	Normal control 1	hsa-miR-1250-002887	0	0	Undetermined				0.04
	Normal control 1	hsa-miR-943-002188	0.807	0.079	37.613	37.613	37.613	21.791	0.04	1	1	1	0.001	0.001	0.001
	Normal control 1	hsa-miR-17#-002421	1.325	0.954	26.545	26.545	26.545	10.723	0.15	1	1	1	0.655	0.655	0.655
	Normal control 1	hsa-miR-517c-001153	1.434	0.98	30.186	30.186	30.186	16.938	0.097	1	1	1	1.441	1.441	1.441
	Normal control 1	mmu-let-7d#-001178	0	0	Undetermined				0.04
	Normal control 1	hsa-miR-620-002672	0	0	Undetermined				0.04
	Normal control 1	hsa-miR-30c-2#-002110	0.812	0.838	28.558	28.558	28.558	12.736	0.04	1	1	1	0.185	0.185	0.185
	Normal control 1	hsa-miR-624-001557	1.428	0.985	31.539	31.539	31.539	15.718	0.155	1	1	1
	Normal control 1	hsa-miR-411-001610	1.467	0.98	27.321	27.321	27.321	14.072	0.302	1	1	1	0.175	0.175	0.175
	Normal control 1	hsa-miR-765-002643	0.88	0.659	30.634	30.634	30.634	14.813	0.04	1	1	1
	Normal control 1	hsa-miR-342-5p-002147	1.109	0.603	26.388	26.388	26.388	13.14	0.058	1	1	1	0.001	0.001	0.001
	Normal control 1	hsa-miR-589-001543	1.238	0.933	28.971	28.971	28.971	13.149	0.109	1	1	1	0.67	0.67	0.67
	Normal control 1	mmu-miR-496-001953	0	0	Undetermined				0.04
	Normal control 1	hsa-let-7a-000377	1.333	0.843	21.456	21.456	21.456	8.208	0.056	1	1	1	0.511	0.511	0.511
	Normal control 1	hsa-miR-1296-002908	0.662	0.667	28.902	28.902	28.902	13.08	0.04	1	1	1	0.11	0.11	0.11
	Normal control 1	hsa-miR-10a-000387	1.373	0.715	21.913	21.913	21.913	8.664	0.194	1	1	1	0.705	0.705	0.705
	Normal control 1	hsa-miR-660-001515	1.429	0.985	23.926	23.926	23.926	10.678	0.27	1	1	1	0.113	0.113	0.113
	Normal control 1	hsa-miR-596-001550	0.77	0.593	22.35	22.35	22.35	6.529	0.04	1	1	1	0.162	0.162	0.162
	Normal control 1	hsa-miR-655-001612	1.291	0.938	29.943	29.943	29.943	16.694	0.072	1	1	1	0.554	0.554	0.554
	Normal control 1	hsa-miR-1252-002860	0	0	Undetermined				0.2
	Normal control 1	hsa-miR-589-002409	0	0	Undetermined				0.056
	Normal control 1	hsa-miR-1304-002874	0.756	0.697	30.384	30.384	30.384	14.562	0.04	1	1	1	0.042	0.042	0.042
	Normal control 1	hsa-miR-101-002253	1.468	0.982	27.316	27.316	27.316	14.067	0.282	1	1	1	0.251	0.251	0.251
	Normal control 1	hsa-miR-551b#-002346	1.208	0.889	32.632	32.632	32.632	16.81	0.04	1	1	1
	Normal control 1	hsa-miR-185#-002104	0	0	Undetermined				0.076
	Normal control 1	hsa-miR-142-3p-000464	1.48	0.972	23.526	23.526	23.526	10.277	0.336	1	1	1	0.152	0.152	0.152
	Normal control 1	hsa-miR-216b-002326	1.405	0.966	28.161	28.161	28.161	14.912	0.154	1	1	1	0.412	0.412	0.412
	Normal control 1	hsa-miR-135b-002261	1.457	0.971	27.813	27.813	27.813	14.565	0.133	1	1	1	0.123	0.123	0.123
	Normal control 1	hsa-miR-617-001591	1.095	0.926	32.626	32.626	32.626	16.805	0.1	1	1	1	0.156	0.156	0.156
	Normal control 1	hsa-miR-361-000554	1.35	0.951	26.517	26.517	26.517	13.269	0.179	1	1	1	0.148	0.148	0.148
	Normal control 1	hsa-miR-920-002150	0	0	Undetermined				0.04
	Normal control 1	hsa-miR-148b#-002160	1.522	0.952	29.726	29.726	29.726	13.904	0.435	1	1	1	0.575	0.575	0.575
	Normal control 1	hsa-miR-647-001600	0	0	Undetermined				0.04
	Normal control 1	hsa-miR-455-001280	1.433	0.987	24.897	24.897	24.897	11.648	0.18	1	1	1	0.205	0.205	0.205
	Normal control 1	hsa-miR-1269-002789	1.175	0.835	31.249	31.249	31.249	15.427	0.127	1	1	1	1.748	1.748	1.748
	Normal control 1	hsa-miR-888-002212	0	0	Undetermined				0.04
	Normal control 1	hsa-miR-331-000545	1.358	0.895	20.183	20.183	20.183	6.935	0.2	1	1	1	0.25	0.25	0.25
	Normal control 1	hsa-miR-548d-001605	1.357	0.965	33.227	33.227	33.227	19.979	0.188	1	1	1
	Normal control 1	hsa-miR-558-001526	0	0	Undetermined				0.2
	Normal control 1	hsa-miR-1201-002781	1.185	0.711	23.4	23.4	23.4	7.579	0.062	1	1	1	0.349	0.349	0.349
	Normal control 1	hsa-miR-106a#-002170	0.478	0.143	18.367	18.367	18.367	2.546	0.04	1	1	1
	Normal control 1	hsa-miR-141#-002145	0	0	Undetermined				0.394
	Normal control 1	hsa-miR-335-000546	1.359	0.951	26.912	26.912	26.912	13.664	0.184	1	1	1	0.16	0.16	0.16
	Normal control 1	hsa-miR-657-001512	0.674	0.182	31.589	31.589	31.589	15.768	0.04	1	1	1
	Normal control 1	hsa-miR-133a-002246	1.332	0.841	22.927	22.927	22.927	9.678	0.147	1	1	1	0.458	0.458	0.458
	Normal control 1	hsa-miR-652-002352	1.403	0.982	26.029	26.029	26.029	12.781	0.243	1	1	1	0.096	0.096	0.096
	Normal control 1	hsa-miR-132#-002132	1.258	0.904	32.338	32.338	32.338	16.516	0.066	1	1	1	0.082	0.082	0.082
	Normal control 1	hsa-miR-509-5p-002235	0	0	Undetermined				0.04
	Normal control 1	hsa-miR-190-000489	1.194	0.943	35.176	35.176	35.176	21.927	0.153	1	1	1
	Normal control 1	hsa-miR-573-001615	0.733	0.459	35.219	35.219	35.219	19.397	0.04	1	1	1
	Normal control 1	hsa-miR-649-001602	1.134	0.959	29.798	29.798	29.798	13.976	0.073	1	1	1	0.662	0.662	0.662
	Normal control 1	hsa-miR-520e-001119	0	0	Undetermined				0.04
	Normal control 1	hsa-miR-155-002623	1.503	0.985	21.856	21.856	21.856	8.607	0.354	1	1	1	0.083	0.083	0.083
	Normal control 1	hsa-miR-192#-002272	1.492	0.933	24.733	24.733	24.733	8.911	0.346	1	1	1	0.619	0.619	0.619
	Normal control 1	hsa-miR-377#-002128	1.036	0.881	30.53	30.53	30.53	14.708	0.04	1	1	1	0	0	0
	Normal control 1	hsa-miR-1292-002824	0	0	Undetermined				0.04
	Normal control 1	hsa-miR-375-000564	1.447	0.947	22.337	22.337	22.337	9.089	0.227	1	1	1	0.449	0.449	0.449
	Normal control 1	hsa-miR-555-001523	0	0	Undetermined				0.061
	Normal control 1	hsa-miR-1274B-002884	1.42	0.958	11.577	11.577	11.577	-4.245	0.253	1	1	1	0.383	0.383	0.383
	Normal control 1	hsa-miR-767-3p-001995	0	0	Undetermined				0.119
	Normal control 1	hsa-miR-190b-002263	1.528	0.945	30.188	30.188	30.188	14.366	0.29	1	1	1	0.277	0.277	0.277
	Normal control 1	hsa-miR-638-001582	0.681	0.549	31.136	31.136	31.136	15.314	0.04	1	1	1	0.044	0.044	0.044
	Normal control 1	hsa-miR-668-001992	0	0	Undetermined				0.04
	Normal control 1	hsa-miR-182-002334	1.372	0.955	33.635	33.635	33.635	20.387	0.239	1	1	1	0.304	0.304	0.304
	Normal control 1	hsa-miR-513-5p-002090	0	0	Undetermined				0.04
	Normal control 1	hsa-miR-519e#-001166	0	0	Undetermined				0.04
	Normal control 1	hsa-miR-105#-002168	0	0	Undetermined				0.04
	Normal control 1	hsa-miR-33a#-002136	1.449	0.988	28.141	28.141	28.141	12.32	0.201	1	1	1	0.314	0.314	0.314
	Normal control 1	hsa-miR-30d#-002305	1.019	0.64	25.9	25.9	25.9	10.078	0.085	1	1	1	0.308	0.308	0.308
	Normal control 1	hsa-miR-548c-001590	0	0	Undetermined				0.075
	Normal control 1	hsa-miR-935-002178	0.783	0.235	34.812	34.812	34.812	18.99	0.04	1	1	1
	Normal control 1	hsa-miR-637-001581	0	0	Undetermined				0.04
	Normal control 1	hsa-miR-128a-002216	1.412	0.973	27.215	27.215	27.215	13.967	0.257	1	1	1	0.694	0.694	0.694
	Normal control 1	hsa-miR-1271-002779	1.412	0.986	25.601	25.601	25.601	9.78	0.219	1	1	1	4.007	4.007	4.007
	Normal control 1	hsa-miR-197-000497	1.178	0.689	21.201	21.201	21.201	7.953	0.064	1	1	1	4.255	4.255	4.255
	Normal control 1	hsa-miR-23b-000400	1.168	0.379	21.229	21.229	21.229	7.981	0.04	1	1	1	1.216	1.216	1.216
	Normal control 1	hsa-miR-130a#-002131	1.437	0.955	31.545	31.545	31.545	15.724	0.167	1	1	1	0.057	0.057	0.057
	Normal control 1	hsa-miR-548M-002775	0	0	Undetermined				0.2
	Normal control 1	hsa-miR-597-001551	1.378	0.952	29.51	29.51	29.51	16.262	0.095	1	1	1
	Normal control 1	hsa-miR-519c-001163	0	0	Undetermined				0.04
	Normal control 1	hsa-miR-125a-5p-002198	1.413	0.956	22.268	22.268	22.268	9.019	0.192	1	1	1	0.696	0.696	0.696
	Normal control 1	hsa-miR-485-5p-001036	0.732	0.745	29.571	29.571	29.571	16.322	0.04	1	1	1	0.096	0.096	0.096
	Normal control 1	hsa-miR-497-001043	1.402	0.949	27.199	27.199	27.199	11.377	0.261	1	1	1	0.079	0.079	0.079
	Normal control 1	hsa-miR-138-002284	1.529	0.987	27.774	27.774	27.774	14.525	0.2	1	1	1	0.093	0.093	0.093
	Normal control 1	hsa-miR-369-3p-000557	0	0	Undetermined				0.04
	Normal control 1	hsa-miR-106b-000442	1.461	0.982	23.318	23.318	23.318	10.069	0.198	1	1	1	0.157	0.157	0.157
	Normal control 1	hsa-miR-9-000583	1.258	0.72	25.986	25.986	25.986	12.738	0.075	1	1	1	0.2	0.2	0.2
	Normal control 1	rno-miR-29c#-001818	1.382	0.991	25.513	25.513	25.513	9.691	0.204	1	1	1	0.263	0.263	0.263
	Normal control 1	hsa-miR-1203-002877	0.77	0.759	30.349	30.349	30.349	14.527	0.04	1	1	1	0.415	0.415	0.415
	Normal control 1	hsa-let-7f-000382	1.113	0.875	25.579	25.579	25.579	12.33	0.082	1	1	1	0.477	0.477	0.477
	Normal control 1	hsa-miR-635-001578	1.453	0.987	31.392	31.392	31.392	15.57	0.165	1	1	1	0.476	0.476	0.476
	Normal control 1	rno-miR-7#-001338	1.266	0.737	23.497	23.497	23.497	7.676	0.114	1	1	1	0.134	0.134	0.134
	Normal control 1	hsa-miR-10b-002218	1.137	0.771	25.532	25.532	25.532	12.284	0.19	1	1	1	0.098	0.098	0.098
	Normal control 1	hsa-miR-132-000457	1.461	0.979	23.693	23.693	23.693	10.445	0.373	1	1	1	0.175	0.175	0.175
	Normal control 1	hsa-miR-147b-002262	1.211	0.671	28.965	28.965	28.965	15.717	0.04	1	1	1	0.009	0.009	0.009
	Normal control 1	mmu-miR-615-001960	0	0	Undetermined				0.04
	Normal control 1	hsa-miR-664-002897	1.348	0.848	21.99	21.99	21.99	6.168	0.163	1	1	1	0.324	0.324	0.324
	Normal control 1	hsa-miR-1294-002785	0	0	Undetermined				0.094
	Normal control 1	hsa-miR-299-3p-001015	0.55	0.177	34.968	34.968	34.968	21.719	0.069	1	1	1
	Normal control 1	hsa-let-7b-002619	1.296	0.72	18.892	18.892	18.892	5.643	0.101	1	1	1	0.526	0.526	0.526
	Normal control 1	hsa-miR-1233-002768	1.059	0.896	22.955	22.955	22.955	7.133	0.04	1	1	1	0.069	0.069	0.069
	Normal control 1	hsa-miR-501-001047	1.285	0.967	26.1	26.1	26.1	12.852	0.06	1	1	1	0.158	0.158	0.158
	Normal control 1	hsa-miR-944-002189	1.321	0.898	36.242	36.242	36.242	20.421	0.326	1	1	1	0.011	0.011	0.011
	Normal control 1	hsa-miR-186-002285	1.536	0.985	21.611	21.611	21.611	8.362	0.362	1	1	1	0.191	0.191	0.191
	Normal control 1	hsa-miR-129#-002298	1.056	0.895	33.626	33.626	33.626	17.804	0.069	1	1	1
	Normal control 1	hsa-miR-892b-002214	0.859	0.885	29.696	29.696	29.696	13.874	0.04	1	1	1	0.002	0.002	0.002
	Normal control 1	hsa-miR-93#-002139	1.509	0.98	24.459	24.459	24.459	8.637	0.315	1	1	1	0.467	0.467	0.467
	Normal control 1	hsa-miR-1284-002903	0	0	Undetermined				0.057
	Normal control 1	hsa-miR-92a-000431	1.42	0.979	21.168	21.168	21.168	7.919	0.193	1	1	1	0.674	0.674	0.674
	Normal control 1	hsa-miR-218-2#-002294	1.084	0.914	35.363	35.363	35.363	19.541	0.1	1	1	1
	Normal control 1	hsa-miR-338-5P-002658	1.042	0.263	36.873	36.873	36.873	21.051	0.095	1	1	1	0	0	0
	Normal control 1	hsa-miR-433-001028	1.433	0.985	27.413	27.413	27.413	14.165	0.117	1	1	1	0.332	0.332	0.332
	Normal control 1	hsa-let-7e-002406	1.313	0.751	18.787	18.787	18.787	5.539	0.167	1	1	1	0.512	0.512	0.512
	Normal control 1	hsa-miR-548P-002798	0	0	Undetermined				0.104
	Normal control 1	hsa-miR-720-002895	1.432	0.98	12.806	12.806	12.806	-3.016	0.237	1	1	1	0.247	0.247	0.247
	Normal control 1	hsa-miR-371-3p-002124	1.109	0.731	28.204	28.204	28.204	14.956	0.04	1	1	1
	Normal control 1	hsa-miR-212-000515	1.376	0.898	25.52	25.52	25.52	12.272	0.1	1	1	1	0.123	0.123	0.123
	Normal control 1	hsa-miR-381-000571	0	0	Undetermined				0.042
	Normal control 1	hsa-miR-9#-002231	1.438	0.978	31.404	31.404	31.404	15.582	0.256	1	1	1	0.228	0.228	0.228
	Normal control 1	hsa-miR-376a#-002127	1.24	0.745	33.519	33.519	33.519	17.697	0.04	1	1	1	3.046	3.046	3.046
	Normal control 1	hsa-miR-1179-002776	1.428	0.878	29.687	29.687	29.687	13.865	0.04	1	1	1	4.431	4.431	4.431
	Normal control 1	hsa-miR-590-5p-001984	1.487	0.964	27.03	27.03	27.03	13.782	0.376	1	1	1	0.281	0.281	0.281
	Normal control 1	hsa-miR-1226#-002758	1.184	0.897	28.587	28.587	28.587	12.765	0.073	1	1	1	0.316	0.316	0.316
	Normal control 1	hsa-miR-183-002269	1.19	0.916	31.771	31.771	31.771	18.522	0.075	1	1	1	0.683	0.683	0.683
	Normal control 1	hsa-miR-331-5p-002233	1.258	0.949	28.373	28.373	28.373	15.125	0.184	1	1	1	0.043	0.043	0.043
	Normal control 1	hsa-miR-653-002292	0	0	Undetermined				0.04
	Normal control 1	hsa-miR-328-000543	1.349	0.961	24.888	24.888	24.888	11.639	0.152	1	1	1	0.665	0.665	0.665
	Normal control 1	hsa-miR-548E-002881	0	0.354	26.996	26.996	26.996	11.175	0.045	1	1	1
	Normal control 1	hsa-miR-29a-002112	1.521	0.974	19.985	19.985	19.985	6.736	0.364	1	1	1	0.084	0.084	0.084
	Normal control 1	hsa-let-7g#-002118	1.265	0.926	27.702	27.702	27.702	11.88	0.075	1	1	1	7.514	7.514	7.514
	Normal control 1	hsa-miR-548b-5p-002408	1.295	0.956	29.115	29.115	29.115	15.866	0.097	1	1	1	0.341	0.341	0.341
	Normal control 1	hsa-miR-449b-001608	1.324	0.953	30.225	30.225	30.225	16.977	0.073	1	1	1	0.61	0.61	0.61
	Normal control 1	hsa-miR-30a-5p-000417	1.512	0.889	20.126	20.126	20.126	4.305	0.316	1	1	1	0.121	0.121	0.121
	Normal control 1	hsa-miR-556-3p-002345	0.596	0	Undetermined				0.211
	Normal control 1	hsa-miR-541-002201	0.752	0.629	32.636	32.636	32.636	19.387	0.04	1	1	1
	Normal control 1	hsa-miR-192-000491	1.448	0.977	17.482	17.482	17.482	4.234	0.127	1	1	1	0.344	0.344	0.344
	Normal control 1	hsa-miR-574-3p-002349	1.407	0.913	19.093	19.093	19.093	5.844	0.225	1	1	1	1.459	1.459	1.459
	Normal control 1	hsa-miR-1285-002822	1.209	0.845	24.571	24.571	24.571	8.749	0.04	1	1	1	0.862	0.862	0.862
	Normal control 1	hsa-miR-29a#-002447	1.419	0.97	27.712	27.712	27.712	11.89	0.156	1	1	1	0.344	0.344	0.344
	Normal control 1	hsa-miR-26b#-002444	1.374	0.956	26.197	26.197	26.197	10.376	0.199	1	1	1	0.395	0.395	0.395
	Normal control 1	hsa-miR-378-002243	1.502	0.578	18.32	18.32	18.32	2.498	0.141	1	1	1	0	0	0
	Normal control 1	hsa-miR-126-002228	1.427	0.926	15.493	15.493	15.493	2.245	0.179	1	1	1	0.263	0.263	0.263
	Normal control 1	mmu-miR-374-5p-001319	1.502	0.99	22.964	22.964	22.964	9.716	0.295	1	1	1	0.278	0.278	0.278
	Normal control 1	hsa-miR-524-001173	0.647	0.132	33.964	33.964	33.964	18.142	0.059	1	1	1
	Normal control 1	hsa-miR-885-3p-002372	1.057	0.867	26.237	26.237	26.237	12.989	0.04	1	1	1	0.165	0.165	0.165
	Normal control 1	hsa-miR-548N-002888	0	0	Undetermined				0.04
	Normal control 1	hsa-miR-618-001593	1.368	0.961	28.325	28.325	28.325	15.077	0.113	1	1	1	0.036	0.036	0.036
	Normal control 1	hsa-miR-564-001531	1.206	0.956	27.979	27.979	27.979	12.157	0.063	1	1	1
	Normal control 1	hsa-miR-524-5p-001982	0	0	Undetermined				0.2
	Normal control 1	hsa-miR-654-3p-002239	1.147	0.854	30.856	30.856	30.856	17.608	0.11	1	1	1
	Normal control 1	hsa-miR-872-002264	0.615	0	Undetermined				0.057
	Normal control 1	hsa-let-7c-000379	1.444	0.974	22.908	22.908	22.908	9.659	0.26	1	1	1	0.526	0.526	0.526
	Normal control 1	hsa-miR-454-002323	1.495	0.975	23.877	23.877	23.877	10.628	0.339	1	1	1	0.067	0.067	0.067
	Normal control 1	hsa-miR-454#-001996	1.315	0.918	29.29	29.29	29.29	13.468	0.112	1	1	1	101.255	101.255	101.255
	Normal control 1	hsa-miR-21#-002438	1.424	0.946	25.691	25.691	25.691	9.87	0.266	1	1	1	0.047	0.047	0.047
	Normal control 1	hsa-miR-335#-002185	1.322	0.902	26.601	26.601	26.601	10.779	0.078	1	1	1	0.094	0.094	0.094
	Normal control 1	hsa-miR-636-002088	1.26	0.956	30.096	30.096	30.096	16.848	0.048	1	1	1	0.024	0.024	0.024
	Normal control 1	hsa-miR-1263-002784	0	0	Undetermined				0.04
	Normal control 1	hsa-miR-18a#-002423	1.363	0.983	28.299	28.299	28.299	12.477	0.111	1	1	1	0.752	0.752	0.752
	Normal control 1	hsa-miR-126#-000451	1.441	0.908	22.386	22.386	22.386	6.565	0.138	1	1	1	0.043	0.043	0.043
	Normal control 1	hsa-miR-579-002398	1.414	0.971	28.797	28.797	28.797	15.549	0.126	1	1	1
	Normal control 1	hsa-miR-548c-5p-002429	1.296	0.947	31.258	31.258	31.258	18.01	0.077	1	1	1	2.723	2.723	2.723
	Normal control 1	hsa-miR-590-3P-002677	1.414	0.896	25.881	25.881	25.881	10.059	0.085	1	1	1	0.192	0.192	0.192
	Normal control 1	hsa-miR-1197-002810	1.166	0.846	30.804	30.804	30.804	14.983	0.046	1	1	1
	Normal control 1	hsa-miR-891b-002210	0	0	Undetermined				0.04
	Normal control 1	hsa-miR-629-001562	1.293	0.881	27.138	27.138	27.138	11.317	0.13	1	1	1	0.318	0.318	0.318
	Normal control 1	hsa-miR-106b#-002380	1.262	0.839	26.635	26.635	26.635	10.814	0.18	1	1	1	0.12	0.12	0.12
	Normal control 1	hsa-miR-569-001536	0	0	Undetermined				0.04
	Normal control 1	hsa-miR-27a#-002445	1.341	0.941	26.003	26.003	26.003	10.181	0.114	1	1	1	0.676	0.676	0.676
	Normal control 1	hsa-miR-1180-002847	1.193	0.905	27.654	27.654	27.654	11.832	0.108	1	1	1	0.484	0.484	0.484
	Normal control 1	hsa-miR-330-000544	1.107	0.416	25.088	25.088	25.088	11.839	0.044	1	1	1	0.927	0.927	0.927
	Normal control 1	hsa-miR-548G-002879	0	0	Undetermined				0.04
	Normal control 1	hsa-miR-143#-002146	0.85	0.636	24.881	24.881	24.881	9.059	0.04	1	1	1	0.006	0.006	0.006
	Normal control 1	hsa-miR-219-000522	0.566	0.06	38.103	38.103	38.103	24.855	0.105	1	1	1
	Normal control 1	hsa-miR-154-000477	0.998	0.926	33.2	33.2	33.2	19.951	0.067	1	1	1
	Normal control 1	hsa-miR-641-001585	0	0	Undetermined				0.056
	Normal control 1	mmu-miR-153-001191	0	0	Undetermined				0.04
	Normal control 1	hsa-miR-548I-002909	0	0	Undetermined				0.092
	Normal control 1	hsa-miR-663B-002857	1.132	0.745	19.715	19.715	19.715	3.893	0.041	1	1	1	0.209	0.209	0.209
	Normal control 1	hsa-miR-1205-002778	0	0	Undetermined				0.04
	Normal control 1	hsa-miR-1238-002927	0.657	0.193	34.519	34.519	34.519	18.698	0.04	1	1	1
	Normal control 1	hsa-miR-1265-002790	0	0	Undetermined				0.2
	Normal control 1	hsa-miR-557-001525	0	0	Undetermined				0.04
	Normal control 1	hsa-miR-875-5p-002203	1.186	0.213	21.836	21.836	21.836	6.015	0.04	1	1	1	0	0	0
	Normal control 1	hsa-miR-222-002276	1.557	0.947	19.535	19.535	19.535	6.287	0.189	1	1	1	0.031	0.031	0.031
	Normal control 1	hsa-miR-25#-002442	0.719	0.533	30.73	30.73	30.73	14.908	0.04	1	1	1	5.218	5.218	5.218
	Normal control 1	hsa-miR-431#-002312	0	0	Undetermined				0.04
	Normal control 1	hsa-miR-517#-001113	0.718	0.702	34.653	34.653	34.653	18.831	0.04	1	1	1	0.02	0.02	0.02
	Normal control 1	hsa-miR-139-3p-002313	1.227	0.781	23.115	23.115	23.115	9.866	0.04	1	1	1	0.588	0.588	0.588
	Normal control 1	ath-miR159a-000338	0.615	0.427	20.185	20.185	20.185	6.937	0.04	1	1	1
	Normal control 1	ath-miR159a-000338	0.659	0	Undetermined	20.185	20.185	6.937	0.04	1	1	1
	Normal control 1	hsa-miR-672-002327	0	0	Undetermined				0.04
	Normal control 1	hsa-miR-561-001528	0.553	0.287	27.279	27.279	27.279	14.03	0.04	1	1	1	0	0	0
	Normal control 1	mmu-miR-140-001187	1.502	0.976	22.591	22.591	22.591	9.343	0.354	1	1	1	0.097	0.097	0.097
	Normal control 1	hsa-miR-582-3p-002399	0	0	Undetermined				0.269
	Normal control 1	hsa-miR-320B-002844	1.42	0.935	26.535	26.535	26.535	10.713	0.189	1	1	1	0.23	0.23	0.23
	Normal control 1	hsa-miR-598-001988	1.467	0.989	28.951	28.951	28.951	15.702	0.225	1	1	1	0.369	0.369	0.369
	Normal control 1	hsa-miR-217-002337	1.092	0.768	33.502	33.502	33.502	20.253	0.129	1	1	1	1.404	1.404	1.404
	Normal control 1	hsa-miR-621-001598	0.97	0.911	28.185	28.185	28.185	12.364	0.04	1	1	1	0	0	0
	Normal control 1	hsa-miR-518a-3p-002397	0.527	0	Undetermined				0.08
	Normal control 1	hsa-miR-584-001624	0.764	0.603	34.046	34.046	34.046	18.225	0.04	1	1	1	0	0	0
	Normal control 1	hsa-miR-592-001546	1.435	0.987	27.138	27.138	27.138	11.316	0.257	1	1	1	0.37	0.37	0.37
	Normal control 1	hsa-miR-203-000507	1.44	0.964	24.414	24.414	24.414	11.166	0.321	1	1	1	0.253	0.253	0.253
	Normal control 1	hsa-miR-593-002411	0	0	Undetermined				0.04
	Normal control 1	hsa-miR-16-1#-002420	1.447	0.985	27.479	27.479	27.479	11.657	0.1	1	1	1	0.305	0.305	0.305
	Normal control 1	hsa-miR-933-002176	0	0	Undetermined				0.2
	Normal control 1	hsa-miR-603-001566	0	0	Undetermined				0.157
	Normal control 1	hsa-miR-147-000469	0	0	Undetermined				0.042
	Normal control 1	hsa-miR-345-002186	1.511	0.986	23.462	23.462	23.462	10.214	0.38	1	1	1	0.904	0.904	0.904
	Normal control 1	hsa-miR-199a-3p-002304	1.42	0.927	21.609	21.609	21.609	8.36	0.236	1	1	1	0.114	0.114	0.114
	Normal control 1	hsa-miR-302a#-002381	0	0	Undetermined				0.04
	Normal control 1	hsa-miR-200c#-002286	0	0	Undetermined				0.04
	Normal control 1	hsa-miR-431-001979	0.927	0.657	25.858	25.858	25.858	12.61	0.05	1	1	1	0.182	0.182	0.182
	Normal control 1	hsa-miR-139-5p-002289	1.442	0.986	20.121	20.121	20.121	6.873	0.246	1	1	1	1.224	1.224	1.224
	Normal control 1	hsa-miR-185-002271	1.445	0.986	25.697	25.697	25.697	12.448	0.227	1	1	1	0.125	0.125	0.125
	Normal control 1	hsa-miR-200b#-002274	0.723	0.23	35.361	35.361	35.361	19.54	0.057	1	1	1	0.001	0.001	0.001
	Normal control 1	mmu-miR-137-001129	0.532	0	Undetermined				0.258
	Normal control 1	hsa-miR-220-000523	0	0	Undetermined				0.04
	Normal control 1	hsa-miR-502-3p-002083	1.393	0.989	29.107	29.107	29.107	15.859	0.178	1	1	1	0.526	0.526	0.526
	Normal control 1	hsa-miR-148a#-002134	1.226	0.964	27.479	27.479	27.479	11.658	0.04	1	1	1	0.706	0.706	0.706
	Normal control 1	hsa-miR-508-001052	0	0	Undetermined				0.087
	Normal control 1	hsa-miR-7-2#-002314	1.245	0.949	29.01	29.01	29.01	13.188	0.058	1	1	1
	Normal control 1	hsa-miR-377-000566	0	0.486	33.606	33.606	33.606	20.358	0.045	1	1	1
	Normal control 1	hsa-miR-588-001542	0	0	Undetermined				0.2
	Normal control 1	hsa-miR-302b#-002119	0	0	Undetermined				0.04
	Normal control 1	hsa-miR-516-3p-001149	1.279	0.78	31.426	31.426	31.426	15.605	0.099	1	1	1	0.025	0.025	0.025
	Normal control 1	hsa-miR-1251-002820	0	0.293	37.169	37.169	37.169	21.347	0.069	1	1	1
	Normal control 1	hsa-miR-100-000437	1.328	0.697	19.789	19.789	19.789	6.541	0.085	1	1	1	0.257	0.257	0.257
	Normal control 1	hsa-miR-640-001584	0.317	0.241	20.805	20.805	20.805	4.983	0.04	1	1	1	11,422.550	11,422.550	11,422.550
	Normal control 1	hsa-miR-376c-002122	1.33	0.903	24.55	24.55	24.55	11.302	0.159	1	1	1	0.227	0.227	0.227
	Normal control 1	hsa-miR-186#-002105	0.853	0.728	32.29	32.29	32.29	16.468	0.049	1	1	1	0.008	0.008	0.008
	Normal control 1	hsa-miR-614-001587	0	0	Undetermined				0.04
	Normal control 1	hsa-miR-586-001539	0	0	Undetermined				0.057
	Normal control 1	hsa-miR-1183-002841	1.143	0.798	30.293	30.293	30.293	14.472	0.066	1	1	1	0.068	0.068	0.068
	Normal control 1	hsa-miR-648-001601	0	0	Undetermined				0.04
	Normal control 1	hsa-miR-525-3p-002385	0	0	Undetermined				0.065
	Normal control 1	hsa-miR-15b#-002173	1.095	0.642	25.238	25.238	25.238	9.416	0.065	1	1	1	0.475	0.475	0.475
	Normal control 1	hsa-miR-221-000524	1.381	0.986	26.192	26.192	26.192	12.944	0.165	1	1	1	0.175	0.175	0.175
	Normal control 1	hsa-miR-556-5p-002344	0	0	Undetermined				0.063
	Normal control 1	hsa-miR-10a#-002288	1.343	0.93	30.411	30.411	30.411	14.589	0.128	1	1	1	1.52	1.52	1.52
	Normal control 1	hsa-miR-452-002329	1.455	0.993	25.826	25.826	25.826	12.578	0.108	1	1	1	0.093	0.093	0.093
	Normal control 1	hsa-miR-650-001603	1.257	0.782	23.013	23.013	23.013	7.191	0.04	1	1	1	0.12	0.12	0.12
	Normal control 1	hsa-miR-337-3p-002157	1.176	0.847	29.768	29.768	29.768	13.946	0.04	1	1	1
	Normal control 1	hsa-miR-448-001029	0	0	Undetermined				0.2
	Normal control 1	hsa-miR-1255A-002805	0.798	0.612	31.93	31.93	31.93	16.108	0.04	1	1	1	0.001	0.001	0.001
	Normal control 1	hsa-miR-520h-001170	0	0	Undetermined				0.106
	Normal control 1	hsa-miR-191#-002678	1.421	0.964	28.998	28.998	28.998	13.176	0.174	1	1	1	182.236	182.236	182.236
	Normal control 1	hsa-miR-1262-002852	0.842	0.594	33.292	33.292	33.292	17.47	0.042	1	1	1	0.032	0.032	0.032
	Normal control 1	hsa-miR-559-001527	0	0	Undetermined				0.04
	Normal control 1	hsa-miR-24-000402	1.344	0.84	16.86	16.86	16.86	3.611	0.165	1	1	1	0.187	0.187	0.187
	Normal control 1	hsa-miR-941-002183	1.146	0.906	26.776	26.776	26.776	10.954	0.04	1	1	1	0.316	0.316	0.316
	Normal control 1	hsa-miR-422a-002297	1.478	0.975	28.311	28.311	28.311	15.063	0.126	1	1	1	0.323	0.323	0.323
	Normal control 1	hsa-miR-675-002005	1.11	0.722	24.589	24.589	24.589	8.767	0.04	1	1	1	0.384	0.384	0.384
	Normal control 1	hsa-miR-200c-002300	1.193	0.921	22.705	22.705	22.705	9.456	0.079	1	1	1	0.052	0.052	0.052
	Normal control 1	hsa-miR-223-002295	1.454	0.837	15.953	15.953	15.953	2.704	0.112	1	1	1	0.565	0.565	0.565
	Normal control 1	hsa-miR-1291-002838	1.375	0.944	26.303	26.303	26.303	10.481	0.163	1	1	1	0.15	0.15	0.15
	Normal control 1	hsa-miR-374b#-002391	1.494	0.986	32.396	32.396	32.396	16.574	0.374	1	1	1
	Normal control 1	hsa-miR-1272-002845	0	0	Undetermined				0.084
	Normal control 1	hsa-miR-224-002099	1.431	0.984	24.875	24.875	24.875	11.626	0.271	1	1	1	0.224	0.224	0.224
	Normal control 1	hsa-miR-580-001621	0.722	0.474	36.944	36.944	36.944	21.122	0.042	1	1	1	0.017	0.017	0.017
	Normal control 1	hsa-miR-550-002410	1.357	0.953	30.176	30.176	30.176	14.355	0.135	1	1	1	0.907	0.907	0.907
	Normal control 1	hsa-miR-216a-002220	1.266	0.853	27.987	27.987	27.987	14.739	0.066	1	1	1	0.011	0.011	0.011
	Normal control 1	hsa-miR-581-001622	0	0	Undetermined				0.054
	Normal control 1	hsa-miR-623-001555	0.882	0.438	33.935	33.935	33.935	18.113	0.04	1	1	1
	Normal control 1	hsa-miR-1290-002863	1.469	0.98	24.983	24.983	24.983	9.162	0.139	1	1	1	0.097	0.097	0.097
	Normal control 1	hsa-miR-646-001599	0.573	0.233	33.5	33.5	33.5	17.679	0.04	1	1	1	0	0	0
	Normal control 1	hsa-miR-1243-002854	0.51	0.212	17.119	17.119	17.119	1.297	0.04	1	1	1
	Normal control 1	hsa-miR-659-001514	0	0.025	38.193	38.193	38.193	22.372	0.04	1	1	1
	Normal control 1	hsa-miR-613-001586	0	0	Undetermined				0.054
	Normal control 1	hsa-miR-513B-002757	0	0	Undetermined				0.04
	Normal control 1	hsa-miR-26a-1#-002443	1.335	0.949	26.926	26.926	26.926	11.104	0.149	1	1	1	0.123	0.123	0.123
	Normal control 1	hsa-miR-518a-5p-002396	0	0	Undetermined				0.2
	Normal control 1	hsa-miR-34b-000427	0	0	Undetermined				0.09
	Normal control 1	hsa-miR-453-002318	0	0	Undetermined				0.083
	Normal control 1	hsa-miR-582-5p-001983	0	0	Undetermined				0.099
	Normal control 1	hsa-miR-374a#-002125	1.433	0.955	33.166	33.166	33.166	17.344	0.215	1	1	1
	Normal control 1	hsa-miR-21-000397	1.307	0.654	18.682	18.682	18.682	5.434	0.068	1	1	1	0.159	0.159	0.159
	Normal control 1	hsa-miR-409-3p-002332	1.47	0.985	23.028	23.028	23.028	7.207	0.283	1	1	1	0.255	0.255	0.255
	Normal control 1	hsa-miR-144#-002148	1.481	0.939	29.123	29.123	29.123	13.302	0.246	1	1	1	0.291	0.291	0.291
	Normal control 1	hsa-miR-33a-002135	1.045	0.944	30.594	30.594	30.594	14.772	0.04	1	1	1	0.067	0.067	0.067
	Normal control 1	hsa-miR-518c-002401	0	0	Undetermined				0.041
	Normal control 1	hsa-miR-874-002268	0.988	0.887	26.297	26.297	26.297	13.048	0.04	1	1	1	0.137	0.137	0.137
	Normal control 1	mmu-miR-93-001090	1.534	0.984	23.018	23.018	23.018	9.769	0.459	1	1	1	0.221	0.221	0.221
	Normal control 1	hsa-miR-198-002273	1.168	0.933	28.31	28.31	28.31	15.061	0.04	1	1	1	0.001	0.001	0.001
	Normal control 1	hsa-miR-523-002386	0.286	0	Undetermined				0.049
	Normal control 1	hsa-miR-578-001619	0	0	Undetermined				0.2
	Normal control 1	hsa-miR-549-001511	0	0	Undetermined				0.04
	Normal control 1	hsa-miR-1276-002843	1.341	0.899	30.444	30.444	30.444	14.622	0.151	1	1	1	1.353	1.353	1.353
	Normal control 1	hsa-miR-27a-000408	1.438	0.984	24.355	24.355	24.355	11.107	0.277	1	1	1	0.066	0.066	0.066
	Normal control 1	hsa-miR-373-000561	0	0	Undetermined				0.071
	Normal control 1	hsa-miR-340#-002259	1.457	0.989	26.253	26.253	26.253	10.431	0.298	1	1	1	1.131	1.131	1.131
	Normal control 1	hsa-miR-326-000542	0.88	0.775	31.711	31.711	31.711	18.462	0.04	1	1	1	9.391	9.391	9.391
	Normal control 1	hsa-miR-744-002324	1.503	0.973	24.99	24.99	24.99	11.741	0.379	1	1	1	0.208	0.208	0.208
	Normal control 1	hsa-miR-23a#-002439	1.145	0.969	31.115	31.115	31.115	15.293	0.056	1	1	1
	Normal control 1	hsa-miR-92a-2#-002138	0	0	Undetermined				0.075
	Normal control 1	hsa-miR-20a#-002437	1.477	0.993	28.289	28.289	28.289	12.467	0.287	1	1	1	0.379	0.379	0.379
	Normal control 1	hsa-miR-425#-002302	1.363	0.957	28.22	28.22	28.22	12.398	0.206	1	1	1	0.144	0.144	0.144
	Normal control 1	hsa-miR-222#-002097	1.381	0.938	27.49	27.49	27.49	11.668	0.146	1	1	1	0.396	0.396	0.396
	Normal control 1	hsa-miR-34b-002102	1.153	0.774	30.723	30.723	30.723	14.901	0.096	1	1	1	0.621	0.621	0.621
	Normal control 1	hsa-miR-576-3p-002351	1.419	0.928	31.542	31.542	31.542	18.294	0.264	1	1	1	0.89	0.89	0.89
	Normal control 1	hsa-miR-631-001564	0	0	Undetermined				0.2
	Normal control 1	hsa-miR-99a-000435	1.241	0.824	20.573	20.573	20.573	7.325	0.118	1	1	1	0.226	0.226	0.226
	Normal control 1	hsa-miR-302b-000531	0.693	0.304	30.621	30.621	30.621	17.373	0.07	1	1	1
	Normal control 1	hsa-miR-370-002275	1.319	0.983	25.358	25.358	25.358	12.11	0.092	1	1	1	0.252	0.252	0.252
	Normal control 1	hsa-miR-193a-5p-002281	1.403	0.976	25.531	25.531	25.531	12.282	0.391	1	1	1	0.252	0.252	0.252
	Normal control 1	hsa-miR-424-000604	1.427	0.979	29.277	29.277	29.277	16.028	0.244	1	1	1	0.193	0.193	0.193
	Normal control 1	hsa-miR-542-5p-002240	1.386	0.976	27.201	27.201	27.201	13.952	0.09	1	1	1	0.181	0.181	0.181
	Normal control 1	hsa-miR-889-002202	1.346	0.954	28.939	28.939	28.939	15.69	0.053	1	1	1	0.003	0.003	0.003
	Normal control 1	hsa-miR-129-000590	0	0	Undetermined				0.115
	Normal control 1	hsa-miR-98-000577	0.823	0.658	23.906	23.906	23.906	10.657	0.04	1	1	1	0.16	0.16	0.16
	Normal control 1	hsa-miR-571-001613	0.966	0.807	28.872	28.872	28.872	13.05	0.04	1	1	1	0.025	0.025	0.025
	Normal control 1	hsa-miR-10b#-002315	1.415	0.986	28.482	28.482	28.482	12.661	0.258	1	1	1	0.073	0.073	0.073
	Normal control 1	hsa-miR-30a-3p-000416	1.475	0.922	20.767	20.767	20.767	4.945	0.312	1	1	1	0.166	0.166	0.166
	Normal control 1	hsa-miR-376b-001102	0	0	Undetermined				0.04
	Normal control 1	hsa-miR-515-5p-001112	0	0	Undetermined				0.172
	Normal control 1	hsa-miR-924-002154	0	0	Undetermined				0.2
	Normal control 1	hsa-miR-625#-002432	1.435	0.854	26.778	26.778	26.778	10.956	0.099	1	1	1	0.046	0.046	0.046
	Normal control 1	hsa-miR-15a#-002419	1.449	0.957	28.39	28.39	28.39	12.568	0.244	1	1	1	0.514	0.514	0.514
	Normal control 1	hsa-miR-1298-002861	0.75	0.723	27.684	27.684	27.684	11.863	0.04	1	1	1	0.067	0.067	0.067
	Normal control 1	hsa-miR-302c#-000534	0	0	Undetermined				0.04
	Normal control 1	hsa-miR-30b#-002129	0	0	Undetermined				0.04
	Normal control 1	hsa-miR-135a-000460	1.368	0.977	32.85	32.85	32.85	19.601	0.165	1	1	1	0.017	0.017	0.017
	Normal control 1	hsa-miR-30e-3p-000422	1.474	0.907	20.465	20.465	20.465	4.643	0.187	1	1	1	0.186	0.186	0.186
	Normal control 1	hsa-miR-891a-002191	1.193	0.915	33.314	33.314	33.314	20.066	0.102	1	1	1	0.138	0.138	0.138
	Normal control 1	hsa-miR-449-001030	1.497	0.966	32.335	32.335	32.335	19.087	0.233	1	1	1	0.112	0.112	0.112
	Normal control 1	hsa-miR-483-3p-002339	1.209	0.565	21.594	21.594	21.594	5.773	0.04	1	1	1	1.155	1.155	1.155
	Normal control 1	hsa-miR-380-5p-000570	1.38	0.938	32.046	32.046	32.046	16.225	0.18	1	1	1	0.043	0.043	0.043
	Normal control 1	hsa-miR-615-5p-002353	0.926	0.626	32.895	32.895	32.895	19.647	0.04	1	1	1	0.055	0.055	0.055
	Normal control 1	hsa-miR-369-5p-001021	1.433	0.977	30.307	30.307	30.307	17.058	0.072	1	1	1	2.306	2.306	2.306
	Normal control 1	hsa-miR-520f-001120	0	0	Undetermined				0.049
	Normal control 1	hsa-miR-30c-1#-002108	0.967	0.728	30.377	30.377	30.377	14.555	0.04	1	1	1	0	0	0
	Normal control 1	hsa-miR-17-002308	1.513	0.993	17.574	17.574	17.574	4.326	0.158	1	1	1	0.143	0.143	0.143
	Normal control 1	hsa-miR-1826-002873	0	0	Undetermined				0.2
	Normal control 1	hsa-miR-143-002249	1.459	0.983	22.961	22.961	22.961	9.713	0.364	1	1	1	0.068	0.068	0.068
	Normal control 1	hsa-miR-494-002365	1.396	0.975	27.03	27.03	27.03	13.782	0.181	1	1	1	0.099	0.099	0.099
	Normal control 1	hsa-miR-518d-001159	0	0	Undetermined				0.04
	Normal control 1	hsa-miR-548b-001541	1.021	0.917	31.921	31.921	31.921	18.673	0.052	1	1	1	0	0	0
	Normal control 1	hsa-miR-378-000567	1.508	0.96	28.494	28.494	28.494	12.672	0.386	1	1	1	2.929	2.929	2.929
	Normal control 1	hsa-miR-770-5p-002002	1.023	0.811	29.338	29.338	29.338	13.517	0.04	1	1	1	0.021	0.021	0.021
	Normal control 1	mmu-miR-491-001630	1.505	0.98	26.366	26.366	26.366	13.118	0.214	1	1	1	0.109	0.109	0.109
	Normal control 1	hsa-miR-196a#-002336	0	0	Undetermined				0.118
	Normal control 1	hsa-let-7c#-002405	0.931	0.879	29.431	29.431	29.431	13.609	0.04	1	1	1	0.314	0.314	0.314
	Normal control 1	hsa-miR-491-3p-002360	0	0	Undetermined				0.04
	Normal control 1	hsa-miR-766-001986	1.233	0.874	24.045	24.045	24.045	8.223	0.078	1	1	1	0.397	0.397	0.397
	Normal control 1	hsa-miR-193a-3p-002250	1.467	0.987	25.585	25.585	25.585	12.336	0.11	1	1	1	0.382	0.382	0.382
	Normal control 1	hsa-miR-181c-000482	1.136	0.919	30.466	30.466	30.466	17.217	0.08	1	1	1	0.144	0.144	0.144
	Normal control 1	hsa-miR-873-002356	0	0	Undetermined				0.174
	Normal control 1	hsa-miR-942-002187	1.328	0.985	30.105	30.105	30.105	14.283	0.192	1	1	1	0.08	0.08	0.08
	Normal control 1	hsa-miR-411#-002238	1.208	0.964	30.436	30.436	30.436	14.614	0.104	1	1	1
	Normal control 1	hsa-miR-298-002190	0	0	Undetermined				0.04
	Normal control 1	hsa-miR-376a-000565	1.402	0.984	27.473	27.473	27.473	14.224	0.297	1	1	1	0.078	0.078	0.078
	Normal control 1	hsa-miR-409-5p-002331	1.206	0.852	31.675	31.675	31.675	18.426	0.062	1	1	1
	Normal control 1	hsa-miR-194-000493	1.454	0.802	18.53	18.53	18.53	5.281	0.125	1	1	1	0.393	0.393	0.393
	Normal control 1	hsa-miR-888#-002213	0	0	Undetermined				0.04
	Normal control 1	hsa-miR-520D-3P-002743	1.549	0.95	32.179	32.179	32.179	16.358	0.118	1	1	1	0	0	0
	Normal control 1	hsa-miR-629-002436	1.366	0.992	29.943	29.943	29.943	16.695	0.091	1	1	1	2.961	2.961	2.961
	Normal control 1	mmu-miR-379-001138	1.481	0.984	25.724	25.724	25.724	12.475	0.096	1	1	1	0.271	0.271	0.271
	Normal control 1	hsa-miR-551b-001535	0	0	Undetermined				0.227
	Normal control 1	hsa-miR-489-002358	1.499	0.987	26.527	26.527	26.527	13.278	0.136	1	1	1	0.08	0.08	0.08
	Normal control 1	hsa-miR-99a#-002141	1.44	0.966	26.243	26.243	26.243	10.421	0.288	1	1	1	0.099	0.099	0.099
	Normal control 1	hsa-miR-661-001606	0.948	0.835	26.088	26.088	26.088	10.266	0.04	1	1	1	0.123	0.123	0.123
	Normal control 1	hsa-miR-605-001568	0.945	0.653	31.487	31.487	31.487	15.666	0.04	1	1	1	0.139	0.139	0.139
	Normal control 1	hsa-miR-627-001560	1.423	0.965	33.404	33.404	33.404	20.156	0.244	1	1	1
	Normal control 1	hsa-miR-1245-002823	0	0	Undetermined				0.056
	Normal control 1	hsa-miR-215-000518	0.853	0.301	17.599	17.599	17.599	4.35	0.04	1	1	1	1.284	1.284	1.284
	Normal control 1	hsa-miR-32-002109	1.398	0.958	28.914	28.914	28.914	15.666	0.141	1	1	1	0.351	0.351	0.351
	Normal control 1	hsa-miR-325-000540	0.537	0.044	15.588	15.588	15.588	2.34	0.04	1	1	1
	Normal control 1	hsa-miR-223#-002098	1.406	0.977	26.619	26.619	26.619	10.798	0.217	1	1	1	0.176	0.176	0.176
	Normal control 1	hsa-miR-518d-5p-002389	0	0	Undetermined				0.054
	Normal control 1	hsa-miR-20b#-002311	0	0	Undetermined				0.171
	Normal control 1	hsa-miR-511-001111	1.509	0.972	27.014	27.014	27.014	13.765	0.373	1	1	1	0.608	0.608	0.608
	Normal control 1	mmu-miR-134-001186	1.155	0.982	24.259	24.259	24.259	11.011	0.068	1	1	1	0.176	0.176	0.176
	Normal control 1	hsa-miR-34a-000426	1.472	0.98	23.486	23.486	23.486	10.238	0.364	1	1	1	0.084	0.084	0.084
	Normal control 1	hsa-miR-205-000509	0	0	Undetermined				0.04
	Normal control 1	hsa-miR-665-002681	0	0	Undetermined				0.04
	Normal control 1	hsa-miR-152-000475	1.512	0.993	22.989	22.989	22.989	9.741	0.222	1	1	1	0.143	0.143	0.143
	Normal control 1	hsa-miR-15a-000389	1.07	0.105	18.702	18.702	18.702	5.453	0.055	1	1	1	12.18	12.18	12.18
	Normal control 1	hsa-miR-199a-000498	1.308	0.972	27.127	27.127	27.127	13.878	0.105	1	1	1	0.06	0.06	0.06
	Normal control 1	hsa-miR-513C-002756	0	0	Undetermined				0.04
	Normal control 1	hsa-miR-383-000573	1.447	0.985	27.431	27.431	27.431	14.183	0.162	1	1	1	1	1	1
	Normal control 1	hsa-miR-410-001274	1.428	0.991	29.427	29.427	29.427	16.179	0.112	1	1	1	0.18	0.18	0.18
	Normal control 1	hsa-miR-634-001576	0	0	Undetermined				0.2
	Normal control 1	hsa-miR-372-000560	1.403	0.969	29.081	29.081	29.081	15.833	0.12	1	1	1	0.428	0.428	0.428
	Normal control 1	hsa-miR-30d-000420	1.338	0.801	21.52	21.52	21.52	5.698	0.153	1	1	1	0.323	0.323	0.323
	Normal control 1	hsa-miR-92b#-002343	0.793	0.223	36.453	36.453	36.453	20.631	0.04	1	1	1	0	0	0
	Normal control 1	hsa-miR-26b-000407	1.303	0.854	22.514	22.514	22.514	9.266	0.139	1	1	1	0.428	0.428	0.428
	Normal control 1	hsa-miR-519d-002403	0.681	0	Undetermined				0.194
	Normal control 1	hsa-miR-140-3p-002234	1.331	0.884	24.88	24.88	24.88	11.632	0.105	1	1	1	0.433	0.433	0.433
	Normal control 1	hsa-miR-548H-002816	0	0	Undetermined				0.246
	Normal control 1	hsa-miR-624-002430	0	0	Undetermined				0.2
	Normal control 1	hsa-miR-1259-002796	0.803	0.63	30.657	30.657	30.657	14.835	0.049	1	1	1
	Normal control 1	hsa-miR-365-001020	1.322	0.977	21.618	21.618	21.618	8.369	0.158	1	1	1	3.39	3.39	3.39
	Normal control 1	hsa-miR-146a#-002163	1.274	0.844	33.17	33.17	33.17	17.348	0.175	1	1	1
	Normal control 1	hsa-miR-423-5p-002340	1.276	0.974	26.239	26.239	26.239	12.991	0.093	1	1	1	0.429	0.429	0.429
	Normal control 1	hsa-miR-302d#-002120	0	0	Undetermined				0.04
	Normal control 1	hsa-miR-519a-002415	1.456	0.979	30.522	30.522	30.522	17.273	0.075	1	1	1	0	0	0
	Normal control 1	hsa-miR-208b-002290	0	0	Undetermined				0.264
	Normal control 1	hsa-miR-543-002376	1.349	0.939	28.472	28.472	28.472	12.65	0.084	1	1	1	0.547	0.547	0.547
	Normal control 1	hsa-miR-626-001559	0	0	Undetermined				0.05
	Normal control 1	hsa-miR-601-001558	1.457	0.962	30.086	30.086	30.086	14.264	0.255	1	1	1	0.179	0.179	0.179
	Normal control 1	hsa-miR-124#-002197	0	0	Undetermined				0.04
	Normal control 1	hsa-miR-548a-5p-002412	0	0	Undetermined				0.04
	Normal control 1	hsa-miR-504-002084	1.208	0.777	27.703	27.703	27.703	14.455	0.04	1	1	1
	Normal control 1	hsa-miR-595-001987	0	0	Undetermined				0.04
	Normal control 1	hsa-miR-767-5p-001993	0	0	Undetermined				0.044
	Normal control 1	hsa-miR-211-000514	0.674	0.748	29.249	29.249	29.249	16.001	0.04	1	1	1
	Normal control 1	hsa-miR-340-002258	1.502	0.982	26.799	26.799	26.799	13.55	0.365	1	1	1	0.524	0.524	0.524
	Normal control 1	hsa-miR-320-002277	1.487	0.991	19.768	19.768	19.768	6.52	0.311	1	1	1	0.18	0.18	0.18
	Normal control 1	hsa-miR-507-001051	0	0	Undetermined				0.2
	Normal control 1	hsa-miR-181a-2#-002317	1.382	0.962	27.171	27.171	27.171	11.35	0.226	1	1	1	0.183	0.183	0.183
	Normal control 1	hsa-miR-202-002363	0.843	0.548	28.78	28.78	28.78	15.531	0.045	1	1	1	2.513	2.513	2.513
	Normal control 1	hsa-miR-769-5p-001998	1.47	0.935	25.64	25.64	25.64	9.818	0.096	1	1	1	1.883	1.883	1.883
	Normal control 1	hsa-miR-324-3p-002161	1.398	0.98	24.968	24.968	24.968	11.72	0.299	1	1	1	0.256	0.256	0.256
	Normal control 1	hsa-miR-16-2#-002171	0	0	Undetermined				0.04
	Normal control 1	hsa-miR-130a-000454	1.226	0.831	24.394	24.394	24.394	11.146	0.111	1	1	1	0.072	0.072	0.072
	Normal control 1	hsa-miR-886-5p-002193	1.343	0.547	19.443	19.443	19.443	6.194	0.07	1	1	1	0.121	0.121	0.121
	Normal control 1	hsa-miR-450b-3p-002208	0	0	Undetermined				0.04
	Normal control 1	hsa-miR-616-001589	1.226	0.972	30.944	30.944	30.944	15.123	0.147	1	1	1	0.143	0.143	0.143
	Normal control 1	hsa-miR-522-002413	0	0	Undetermined				0.178
	Normal control 1	hsa-miR-214#-002293	1.471	0.969	25.054	25.054	25.054	9.232	0.209	1	1	1	0.062	0.062	0.062
	Normal control 1	hsa-miR-23a-000399	0.762	0.902	24.853	24.853	24.853	11.605	0.04	1	1	1	0.331	0.331	0.331
	Normal control 1	hsa-miR-1227-002769	1.241	0.939	28.297	28.297	28.297	12.476	0.062	1	1	1	0.214	0.214	0.214
	Normal control 1	hsa-miR-195#-002107	0.803	0.489	28.587	28.587	28.587	12.765	0.04	1	1	1	0.011	0.011	0.011
	Normal control 1	hsa-miR-155#-002287	0	0	Undetermined				0.04
	Normal control 1	hsa-miR-552-001520	0	0	Undetermined				0.1
	Normal control 1	hsa-miR-604-001567	1.186	0.947	31.69	31.69	31.69	15.868	0.082	1	1	1	0	0	0
	Normal control 1	hsa-miR-512-5p-001145	0.569	0.604	31.015	31.015	31.015	17.767	0.04	1	1	1	0	0	0
	Normal control 1	hsa-miR-570-002347	1.324	0.905	30.481	30.481	30.481	17.232	0.04	1	1	1	2.089	2.089	2.089
	Normal control 1	hsa-miR-1206-002878	0	0	Undetermined				0.2
	Normal control 1	hsa-miR-487b-001285	1.441	0.977	28.28	28.28	28.28	15.031	0.166	1	1	1	0.239	0.239	0.239
	Normal control 1	hsa-miR-551a-001519	0.764	0.528	32.935	32.935	32.935	17.113	0.04	1	1	1	0	0	0
	Normal control 1	hsa-miR-199b-000500	1.184	0.92	29.002	29.002	29.002	15.753	0.063	1	1	1	0.037	0.037	0.037
	Normal control 1	hsa-miR-193b-002367	1.376	0.974	18.547	18.547	18.547	5.299	0.217	1	1	1	0.706	0.706	0.706
	Normal control 1	hsa-miR-221#-002096	0	0	Undetermined				0.062
	Normal control 1	hsa-miR-515-3p-002369	0	0	Undetermined				0.368
	Normal control 1	hsa-miR-1255B-002801	1.415	0.99	28.287	28.287	28.287	12.465	0.151	1	1	1	1.321	1.321	1.321
	Normal control 1	hsa-miR-138-2#-002144	0	0	Undetermined				0.04
	Normal control 1	hsa-miR-517a-002402	1.3	0.921	32.006	32.006	32.006	18.758	0.117	1	1	1	0.038	0.038	0.038
	Normal control 1	hsa-miR-1208-002880	0.865	0.711	30.803	30.803	30.803	14.981	0.04	1	1	1	0.037	0.037	0.037
	Normal control 1	hsa-miR-362-3p-002117	1.483	0.986	29.4	29.4	29.4	16.151	0.22	1	1	1	0.286	0.286	0.286
	Normal control 1	hsa-miR-127-5p-002229	0	0	Undetermined				0.04
	Normal control 1	hsa-miR-450a-002303	1.463	0.978	29.536	29.536	29.536	16.288	0.136	1	1	1	0.164	0.164	0.164
	Normal control 1	hsa-miR-1184-002842	0	0	Undetermined				0.113
	Normal control 1	hsa-miR-562-001529	0.738	0.519	19.225	19.225	19.225	3.403	0.04	1	1	1
	Normal control 1	hsa-miR-548d-5p-002237	1.173	0.939	29.845	29.845	29.845	16.597	0.074	1	1	1	0.004	0.004	0.004
	Normal control 1	hsa-miR-99b#-002196	1.411	0.927	27.393	27.393	27.393	11.571	0.138	1	1	1	0.051	0.051	0.051
	Normal control 1	hsa-miR-1182-002830	0.669	0.195	35.826	35.826	35.826	20.004	0.04	1	1	1
	Normal control 1	hsa-miR-600-001556	0	0	Undetermined				0.04
	Normal control 1	hsa-miR-545#-002266	1.142	0.879	35.403	35.403	35.403	19.581	0.104	1	1	1	1.49	1.49	1.49
	Normal control 1	hsa-miR-1324-002815	0	0	Undetermined				0.04
	Normal control 1	hsa-miR-200b-002251	1.334	0.883	22.109	22.109	22.109	8.861	0.074	1	1	1	0.093	0.093	0.093
	Normal control 1	hsa-miR-20a-000580	1.341	0.615	18.475	18.475	18.475	5.226	0.167	1	1	1	0.778	0.778	0.778
	Normal control 1	hsa-miR-1248-002870	1.463	0.978	27.489	27.489	27.489	11.667	0.341	1	1	1	0.173	0.173	0.173
	Normal control 1	hsa-miR-518e#-002371	0.589	0	Undetermined				0.16
	Normal control 1	hsa-miR-769-3p-002003	0	0	Undetermined				0.04
	Normal control 1	hsa-miR-575-001617	0.805	0.548	32.319	32.319	32.319	16.498	0.04	1	1	1
	Normal control 1	hsa-miR-339-5p-002257	1.125	0.899	24.774	24.774	24.774	11.525	0.075	1	1	1	0.144	0.144	0.144
	Normal control 1	hsa-miR-518b-001156	0.682	0.206	36.367	36.367	36.367	23.118	0.044	1	1	1	0	0	0
	Normal control 1	hsa-miR-125b-2#-002158	1.205	0.594	22.756	22.756	22.756	6.934	0.04	1	1	1	0.271	0.271	0.271
	Normal control 1	hsa-miR-936-002179	0	0	Undetermined				0.2
	Normal control 1	hsa-miR-382-000572	1.305	0.618	24.415	24.415	24.415	11.167	0.1	1	1	1	0.272	0.272	0.272
	Normal control 1	hsa-miR-639-001583	0.99	0.781	28.839	28.839	28.839	13.017	0.04	1	1	1	0	0	0
	Normal control 1	hsa-miR-499-3p-002427	0	0.229	36.679	36.679	36.679	23.431	0.04	1	1	1
	Normal control 1	hsa-let-7a#-002307	1.023	0.952	28.993	28.993	28.993	13.171	0.04	1	1	1	0.139	0.139	0.139
	Normal control 1	hsa-miR-302c-000533	0	0.241	30.383	30.383	30.383	17.134	0.04	1	1	1	0.001	0.001	0.001
	Normal control 1	hsa-miR-302d-000535	0	0	Undetermined				0.049
	Normal control 1	hsa-miR-871-002354	0	0	Undetermined				0.2
	Normal control 1	hsa-miR-1253-002894	0.778	0.738	31.376	31.376	31.376	15.554	0.04	1	1	1	0.173	0.173	0.173
	Normal control 1	mmu-miR-499-001352	0	0	Undetermined				0.08
	Normal control 1	hsa-miR-1204-002872	0	0	Undetermined				0.04
	Normal control 1	hsa-miR-146a-000468	1.438	0.989	18.416	18.416	18.416	5.167	0.215	1	1	1	0.175	0.175	0.175
	Normal control 1	hsa-miR-432-001026	1.537	0.983	27.804	27.804	27.804	11.982	0.403	1	1	1	0.183	0.183	0.183
	Normal control 1	hsa-miR-29c-000587	1.381	0.759	25.776	25.776	25.776	12.527	0.129	1	1	1	0.162	0.162	0.162
	Normal control 1	hsa-miR-802-002004	0	0	Undetermined				0.04
	Normal control 1	hsa-miR-135b#-002159	0	0	Undetermined				0.04
	Normal control 1	hsa-miR-643-001594	1.011	0.752	30.623	30.623	30.623	14.802	0.04	1	1	1	1.054	1.054	1.054
	Normal control 1	hsa-miR-487a-001279	1.171	0.956	29.502	29.502	29.502	16.253	0.04	1	1	1	2.029	2.029	2.029
	Normal control 1	hsa-miR-31-002279	1.41	0.973	26.536	26.536	26.536	13.288	0.298	1	1	1	0.037	0.037	0.037
	Normal control 1	hsa-miR-566-001533	0.863	0.519	26.544	26.544	26.544	10.722	0.04	1	1	1	0.111	0.111	0.111
	Normal control 1	hsa-miR-424#-002309	1.423	0.95	26.302	26.302	26.302	10.48	0.132	1	1	1	2.038	2.038	2.038
	Normal control 1	hsa-miR-32#-002111	0	0	Undetermined				0.04
	Normal control 1	hsa-miR-220b-002206	0	0	Undetermined				0.04
	Normal control 1	hsa-miR-29b-2#-002166	1.311	0.905	28.269	28.269	28.269	12.447	0.081	1	1	1	0.281	0.281	0.281
	Normal control 1	hsa-miR-518f-002388	0.84	0.808	34.003	34.003	34.003	20.755	0.052	1	1	1	0	0	0
	Normal control 1	hsa-miR-1256-002850	1.145	0.794	32.913	32.913	32.913	17.091	0.055	1	1	1
	Normal control 1	hsa-miR-622-001553	1.239	0.983	28.357	28.357	28.357	12.536	0.15	1	1	1	0.197	0.197	0.197
	Normal control 1	hsa-miR-548J-002783	1.134	0.843	32.577	32.577	32.577	16.755	0.075	1	1	1	0.105	0.105	0.105
	Normal control 1	hsa-miR-651-001604	0	0	Undetermined				0.155
	Normal control 1	hsa-miR-16-000391	1.401	0.981	19.724	19.724	19.724	6.476	0.255	1	1	1	0.183	0.183	0.183
	Normal control 1	hsa-miR-95-000433	1.379	0.765	24.342	24.342	24.342	11.093	0.114	1	1	1	0.085	0.085	0.085
	Normal control 1	hsa-miR-656-001510	1.226	0.969	29.659	29.659	29.659	13.837	0.072	1	1	1	0.098	0.098	0.098
	Normal control 1	hsa-miR-576-5p-002350	1.139	0.63	26.96	26.96	26.96	13.712	0.04	1	1	1	0.854	0.854	0.854
	Normal control 1	hsa-miR-338-3p-002252	1.317	0.969	29.243	29.243	29.243	15.994	0.081	1	1	1	0.037	0.037	0.037
	Normal control 1	hsa-miR-130b-000456	1.32	0.97	25.068	25.068	25.068	11.819	0.164	1	1	1	0.547	0.547	0.547
	Normal control 1	hsa-miR-500-001046	0.833	0.76	29.734	29.734	29.734	13.913	0.04	1	1	1
	Normal control 1	mmu-miR-451-001141	1.477	0.957	25.943	25.943	25.943	12.695	0.31	1	1	1	0.05	0.05	0.05
	Normal control 1	hsa-miR-484-001821	1.484	0.991	18.226	18.226	18.226	4.977	0.274	1	1	1	0.79	0.79	0.79
	Normal control 1	hsa-miR-934-002177	0	0	Undetermined				0.126
	Normal control 1	hsa-miR-188-3p-002106	0	0.359	20.814	20.814	20.814	7.566	0.04	1	1	1	0.079	0.079	0.079
	Normal control 1	hsa-miR-219-2-3p-002390	0	0	Undetermined				0.2
	Normal control 1	hsa-miR-1225-3P-002766	0.827	0.577	27.829	27.829	27.829	12.007	0.04	1	1	1	0	0	0
	Normal control 1	hsa-miR-425-5p-001516	1.254	0.884	22.474	22.474	22.474	9.225	0.078	1	1	1	0.547	0.547	0.547
	Normal control 1	hsa-miR-384-000574	0	0	Undetermined				0.043
	Normal control 1	hsa-miR-151-3p-002254	1.492	0.927	22.056	22.056	22.056	6.234	0.286	1	1	1	0.122	0.122	0.122
	Normal control 1	hsa-let-7d-002283	1.417	0.942	23.012	23.012	23.012	9.764	0.248	1	1	1	0.381	0.381	0.381
	Normal control 1	hsa-miR-301b-002392	1.404	0.961	30.304	30.304	30.304	17.056	0.115	1	1	1	2.834	2.834	2.834
	Normal control 1	hsa-miR-30b-000602	1.386	0.858	18.149	18.149	18.149	4.901	0.154	1	1	1	0.477	0.477	0.477
	Normal control 1	hsa-miR-483-5p-002338	1.501	0.983	22.645	22.645	22.645	9.397	0.278	1	1	1	0.519	0.519	0.519
	Normal control 1	hsa-miR-28-3p-002446	1.452	0.985	21.514	21.514	21.514	8.265	0.296	1	1	1	0.371	0.371	0.371
	Normal control 1	hsa-miR-630-001563	1.093	0.828	31.377	31.377	31.377	15.556	0.059	1	1	1	2.407	2.407	2.407
	Normal control 1	hsa-miR-563-001530	0	0	Undetermined				0.2
	Normal control 1	hsa-miR-18a-002422	1.418	0.982	27.751	27.751	27.751	14.502	0.352	1	1	1	0.181	0.181	0.181
	Normal control 1	hsa-miR-183#-002270	1.304	0.947	28.905	28.905	28.905	13.083	0.106	1	1	1	0.09	0.09	0.09
	Normal control 1	hsa-miR-744#-002325	1.271	0.943	26.759	26.759	26.759	10.937	0.061	1	1	1	0.341	0.341	0.341
	Normal control 1	hsa-miR-1293-002905	0	0	Undetermined				0.04
	Normal control 1	hsa-miR-518c#-001158	0	0	Undetermined				0.04
	Normal control 1	hsa-miR-19b-000396	1.292	0.907	18.209	18.209	18.209	4.96	0.166	1	1	1	0.31	0.31	0.31
	Normal control 1	hsa-miR-544-002265	0	0	Undetermined				0.2
	Normal control 1	hsa-miR-380-3p-000569	0	0.054	36.898	36.898	36.898	23.65	0.04	1	1	1	0	0	0
	Normal control 1	hsa-miR-191-002299	1.418	0.926	17.083	17.083	17.083	3.834	0.229	1	1	1	0.36	0.36	0.36
	Normal control 1	hsa-miR-662-001607	0.855	0.703	29.84	29.84	29.84	14.018	0.04	1	1	1	0.064	0.064	0.064
	Normal control 1	hsa-miR-1289-002871	0	0	Undetermined				0.04
	Normal control 1	hsa-miR-520a-001167	0	0.381	36.872	36.872	36.872	23.623	0.046	1	1	1	0	0	0
	Normal control 1	hsa-miR-503-001048	0.745	0.742	30.215	30.215	30.215	16.967	0.04	1	1	1	0	0	0
	Normal control 1	hsa-miR-125b-000449	1.363	0.91	20.743	20.743	20.743	7.495	0.164	1	1	1	0.134	0.134	0.134
	Normal control 1	hsa-miR-92a-1#-002137	1.499	0.98	28.786	28.786	28.786	12.964	0.191	1	1	1	0.552	0.552	0.552
	Normal control 1	hsa-miR-1302-002901	0	0	Undetermined				0.04
	Normal control 1	hsa-miR-1274A-002883	1.448	0.949	18.607	18.607	18.607	2.786	0.32	1	1	1	0.034	0.034	0.034
	Normal control 1	hsa-miR-218-000521	1.485	0.962	25.241	25.241	25.241	11.993	0.324	1	1	1	0.019	0.019	0.019
	Normal control 1	hsa-miR-194#-002379	1.149	0.775	24.255	24.255	24.255	8.434	0.04	1	1	1
	Normal control 1	hsa-miR-136-000592	1.248	0.949	33.338	33.338	33.338	20.09	0.087	1	1	1	0.184	0.184	0.184
	Normal control 1	U6 snRNA-001973	1.171	0.308	8.579	10.276	10.276	-4.259	0.04	1	1	1	0.123	0.123	0.123
	Normal control 1	U6 snRNA-001973	1.185	0.465	9.633	10.276	10.276	-4.259	0.04	1	1	1	0.123	0.123	0.123
	Normal control 1	U6 snRNA-001973	1.175	0.338	8.544	10.276	10.276	-4.259	0.04	1	1	1	0.123	0.123	0.123
	Normal control 1	U6 snRNA-001973	1.185	0.609	10.793	10.276	10.276	-4.259	0.04	1	1	1	0.123	0.123	0.123
	Normal control 1	U6 snRNA-001973	1.179	0.634	10.83	10.276	10.276	-4.259	0.04	1	1	1	0.123	0.123	0.123
	Normal control 1	U6 snRNA-001973	1.187	0.54	10.722	10.276	10.276	-4.259	0.04	1	1	1	0.123	0.123	0.123
	Normal control 1	U6 snRNA-001973	1.2	0.523	11.324	10.276	10.276	-4.259	0.04	1	1	1	0.123	0.123	0.123
	Normal control 1	U6 snRNA-001973	1.198	0.524	11.781	10.276	10.276	-4.259	0.04	1	1	1	0.123	0.123	0.123
	Normal control 1	hsa-miR-502-001109	1.213	0.971	30.394	30.394	30.394	17.146	0.081	1	1	1	0.056	0.056	0.056
	Normal control 1	hsa-miR-518f#-002387	0	0	Undetermined				0.065
	Normal control 1	hsa-miR-193b#-002366	1.251	0.908	26.391	26.391	26.391	10.57	0.052	1	1	1	0.5	0.5	0.5
	Normal control 1	hsa-miR-412-001023	0.648	0.451	31.53	31.53	31.53	18.282	0.04	1	1	1	0.022	0.022	0.022
	Normal control 1	hsa-miR-30c-000419	1.42	0.976	18.641	18.641	18.641	5.393	0.271	1	1	1	0.385	0.385	0.385
	Normal control 1	hsa-miR-218-1#-002094	0	0	Undetermined				0.044
	Normal control 1	hsa-miR-149-002255	1.315	0.986	23.948	23.948	23.948	10.7	0.11	1	1	1	0.429	0.429	0.429
	Normal control 1	hsa-miR-154#-000478	0.493	0	Undetermined				0.184
	Normal control 1	hsa-miR-922-002152	1.234	0.883	31.329	31.329	31.329	15.508	0.074	1	1	1	0.222	0.222	0.222
	Normal control 1	hsa-miR-548L-002904	0	0	Undetermined				0.04
	Normal control 1	hsa-miR-150-000473	1.435	0.979	18.787	18.787	18.787	5.538	0.292	1	1	1	0.086	0.086	0.086
	Normal control 1	hsa-miR-103-000439	1.297	0.806	22.002	22.002	22.002	8.754	0.079	1	1	1	0.438	0.438	0.438
	Normal control 1	hsa-miR-500-002428	1.45	0.984	27.249	27.249	27.249	14	0.238	1	1	1	0.179	0.179	0.179
	Normal control 1	hsa-miR-488-001106	0	0	Undetermined				0.04
	Normal control 1	hsa-miR-324-5p-000539	1.391	0.913	24.75	24.75	24.75	11.502	0.145	1	1	1	0.196	0.196	0.196
	Normal control 1	hsa-miR-921-002151	0	0	Undetermined				0.04
	Normal control 1	hsa-miR-130b#-002114	1.068	0.838	26.392	26.392	26.392	10.57	0.04	1	1	1	264.342	264.342	264.342
	Normal control 1	hsa-miR-105-002167	0	0	Undetermined				0.063
	Normal control 1	hsa-miR-520b-001116	1.06	0.492	31.405	31.405	31.405	18.156	0.041	1	1	1	0	0	0
	Normal control 1	hsa-miR-337-5p-002156	1.421	0.981	28.43	28.43	28.43	15.181	0.16	1	1	1	0.006	0.006	0.006
	Normal control 1	hsa-miR-508-5p-002092	0.575	0.086	22.456	22.456	22.456	9.208	0.04	1	1	1	0.005	0.005	0.005
	Normal control 1	hsa-miR-18b-002217	1.059	0.884	26.109	26.109	26.109	12.86	0.067	1	1	1	2.779	2.779	2.779
	Normal control 1	hsa-miR-541#-002200	0.504	0.127	15.92	15.92	15.92	0.098	0.04	1	1	1	0.332	0.332	0.332
	Normal control 1	hsa-miR-28-000411	1.422	0.974	23.772	23.772	23.772	10.524	0.299	1	1	1	0.263	0.263	0.263
	Normal control 1	hsa-miR-367-000555	0	0	Undetermined				0.04
	Normal control 1	hsa-miR-146b-3p-002361	1.396	0.974	28.791	28.791	28.791	15.542	0.205	1	1	1	0.175	0.175	0.175
	Normal control 1	hsa-miR-553-001521	0	0	Undetermined				0.046
	Normal control 1	hsa-miR-607-001570	0	0	Undetermined				0.04
	Normal control 1	hsa-miR-1260-002896	1.344	0.941	20.417	20.417	20.417	4.595	0.187	1	1	1	0.138	0.138	0.138
	Normal control 1	hsa-miR-939-002182	0.873	0.543	25.933	25.933	25.933	10.111	0.04	1	1	1	0.039	0.039	0.039
	Normal control 1	hsa-miR-149#-002164	0.925	0.918	24.078	24.078	24.078	8.257	0.04	1	1	1	0.845	0.845	0.845
	Normal control 1	hsa-miR-455-3p-002244	1.389	0.992	24.857	24.857	24.857	11.608	0.162	1	1	1	0.698	0.698	0.698
	Normal control 1	hsa-miR-200a#-001011	1.43	0.958	29.761	29.761	29.761	13.939	0.314	1	1	1	0.016	0.016	0.016
	Normal control 1	hsa-miR-125b-1#-002378	1.414	0.99	30.172	30.172	30.172	14.351	0.186	1	1	1	0.067	0.067	0.067
	Normal control 1	hsa-miR-24-2#-002441	1.229	0.894	29.044	29.044	29.044	13.222	0.08	1	1	1	0.167	0.167	0.167
	Normal control 1	hsa-miR-516a-5p-002416	0	0	Undetermined				0.087
	Normal control 1	hsa-miR-520c-3p-002400	1.031	0.423	27.428	27.428	27.428	11.606	0.06	1	1	1	12.72	12.72	12.72
	Normal control 1	hsa-miR-339-3p-002184	1.342	0.972	25.409	25.409	25.409	12.161	0.196	1	1	1	0.149	0.149	0.149
	Normal control 1	hsa-miR-208-000511	0.763	0.71	28.054	28.054	28.054	14.806	0.04	1	1	1
	Normal control 1	hsa-miR-554-001522	1.112	0.921	31.229	31.229	31.229	15.408	0.041	1	1	1
	Normal control 1	hsa-miR-567-001534	0.649	0.37	32.853	32.853	32.853	17.031	0.04	1	1	1	0.001	0.001	0.001
	Normal control 1	hsa-miR-525-001174	0	0	Undetermined				0.108
	Normal control 1	hsa-miR-542-3p-001284	1.367	0.938	32.457	32.457	32.457	19.209	0.125	1	1	1	5.506	5.506	5.506
	Normal control 1	hsa-miR-505-002089	1.334	0.988	26.918	26.918	26.918	13.669	0.105	1	1	1	0.182	0.182	0.182
	Normal control 1	hsa-miR-106a-002169	1.515	0.982	18.349	18.349	18.349	5.1	0.381	1	1	1	0.249	0.249	0.249
	Normal control 1	hsa-miR-516b-001150	0	0	Undetermined				0.099
	Normal control 1	hsa-miR-609-001573	0	0	Undetermined				0.04
	Normal control 1	hsa-miR-151-5P-002642	1.381	0.958	23.225	23.225	23.225	7.404	0.236	1	1	1	0.349	0.349	0.349
	Normal control 1	hsa-miR-122-002245	1.466	0.979	15.616	15.616	15.616	2.367	0.238	1	1	1	0.703	0.703	0.703
	Normal control 1	hsa-miR-148a-000470	1.38	0.993	21.974	21.974	21.974	8.725	0.16	1	1	1	0.64	0.64	0.64
	Normal control 1	hsa-miR-204-000508	1.391	0.842	23.338	23.338	23.338	10.089	0.117	1	1	1	0.255	0.255	0.255
	Normal control 1	hsa-miR-219-1-3p-002095	1.109	0.898	31.755	31.755	31.755	18.507	0.075	1	1	1	0.511	0.511	0.511
	Normal control 1	hsa-miR-452#-002330	0	0	Undetermined				0.04
	Normal control 1	hsa-miR-200a-000502	1.507	0.992	23.477	23.477	23.477	10.228	0.172	1	1	1	0.051	0.051	0.051
	Normal control 1	hsa-miR-644-001596	0.702	0.454	32.65	32.65	32.65	16.828	0.04	1	1	1	0.013	0.013	0.013
	Normal control 1	hsa-miR-591-001545	0	0	Undetermined				0.071
	Normal control 1	hsa-miR-606-001569	0	0	Undetermined				0.178
	Normal control 1	hsa-miR-1249-002868	0.783	0.889	29.401	29.401	29.401	13.579	0.04	1	1	1	0.302	0.302	0.302
	Normal control 1	hsa-let-7g-002282	1.485	0.986	21.379	21.379	21.379	8.131	0.309	1	1	1	0.158	0.158	0.158
	Normal control 1	hsa-miR-329-001101	1.395	0.947	32.506	32.506	32.506	19.258	0.11	1	1	1	7.665	7.665	7.665
	Normal control 1	RNU44-001094	1.268	0.078	13.248	14.535	14.535		0.045
	Normal control 1	RNU44-001094	1.243	0.664	15.822	14.535	14.535		0.045
	Normal control 1	hsa-miR-512-3p-001823	0	0	Undetermined				0.103
	Normal control 1	hsa-miR-34c-000428	0.918	0.708	35.942	35.942	35.942	22.693	0.121	1	1	1	0.003	0.003	0.003
	Normal control 1	hsa-miR-29b-1#-002165	1.161	0.941	29.219	29.219	29.219	13.398	0.068	1	1	1	2.625	2.625	2.625
	Normal control 1	hsa-miR-210-000512	1.246	0.765	20.929	20.929	20.929	7.681	0.055	1	1	1	0.122	0.122	0.122
	Normal control 1	hsa-miR-1301-002827	0	0	Undetermined				0.04
	Normal control 1	hsa-miR-486-001278	1.3	0.974	28.876	28.876	28.876	15.627	0.075	1	1	1	0.028	0.028	0.028
	Normal control 1	hsa-miR-27b-000409	1.51	0.991	23.96	23.96	23.96	10.711	0.352	1	1	1	0.194	0.194	0.194
	Normal control 1	hsa-miR-127-000452	1.469	0.979	25.245	25.245	25.245	11.996	0.322	1	1	1	0.147	0.147	0.147
	Normal control 1	hsa-miR-1-002222	1.419	0.913	29.753	29.753	29.753	16.504	0.052	1	1	1	0.001	0.001	0.001
	Normal control 1	hsa-miR-202#-002362	0	0	Undetermined				0.04
	Normal control 1	hsa-miR-885-5p-002296	1.412	0.951	18.232	18.232	18.232	4.983	0.124	1	1	1	0.963	0.963	0.963
	Normal control 1	hsa-miR-19a-000395	1.323	0.962	25.564	25.564	25.564	12.315	0.238	1	1	1	0.236	0.236	0.236
	Normal control 1	hsa-miR-195-000494	1.435	0.966	23.392	23.392	23.392	10.144	0.256	1	1	1	0.058	0.058	0.058
	Normal control 1	hsa-miR-26a-000405	1.334	0.891	19.358	19.358	19.358	6.11	0.105	1	1	1	0.424	0.424	0.424
	Normal control 1	hsa-miR-34a#-002316	1.449	0.986	25.593	25.593	25.593	9.771	0.342	1	1	1	0.093	0.093	0.093
	Normal control 1	hsa-miR-585-001625	0.47	0	Undetermined				0.04
	Normal control 1	hsa-miR-1267-002885	0.952	0.914	30.845	30.845	30.845	15.023	0.06	1	1	1	0.043	0.043	0.043
	Normal control 1	mmu-miR-124a-001182	0.967	0.378	26.227	26.227	26.227	12.979	0.04	1	1	1	2.385	2.385	2.385
	Normal control 1	hsa-miR-100#-002142	1.535	0.96	31.287	31.287	31.287	15.465	0.226	1	1	1	0.075	0.075	0.075
	Normal control 1	hsa-miR-346-000553	0.684	0.514	28.195	28.195	28.195	14.947	0.04	1	1	1	1.28	1.28	1.28
	Normal control 1	hsa-miR-645-001597	0.918	0.631	36.897	36.897	36.897	21.075	0.04	1	1	1	0.182	0.182	0.182
	Normal control 1	hsa-miR-342-3p-002260	1.307	0.738	16.783	16.783	16.783	3.534	0.063	1	1	1	0.326	0.326	0.326
	Normal control 1	hsa-miR-671-3p-002322	1.43	0.95	29.443	29.443	29.443	16.195	0.236	1	1	1	0.224	0.224	0.224
	Normal control 1	hsa-miR-937-002180	0	0	Undetermined				0.09
	Normal control 1	hsa-miR-29b-000413	1.385	0.963	26.778	26.778	26.778	13.53	0.253	1	1	1	0.234	0.234	0.234
	Normal control 1	hsa-miR-363#-001283	0.442	0.224	32.063	32.063	32.063	16.241	0.04	1	1	1
	Normal control 1	hsa-miR-184-000485	1.485	0.974	30.365	30.365	30.365	17.116	0.135	1	1	1	0.095	0.095	0.095
	Normal control 1	hsa-miR-1224-3P-002752	0	0	Undetermined				0.2
	Normal control 1	hsa-miR-136#-002100	1.484	0.941	28.428	28.428	28.428	12.606	0.244	1	1	1	0.066	0.066	0.066
	Normal control 1	hsa-miR-26a-2#-002115	1.341	0.98	28.221	28.221	28.221	12.4	0.062	1	1	1	1.015	1.015	1.015
	Normal control 1	hsa-miR-758-001990	1.308	0.917	29.645	29.645	29.645	16.397	0.064	1	1	1	0.077	0.077	0.077
	Normal control 1	hsa-miR-545-002267	1.193	0.921	34.605	34.605	34.605	21.356	0.157	1	1	1	0.018	0.018	0.018
	Normal control 1	hsa-miR-1283-002890	0	0	Undetermined				0.074
	Normal control 1	hsa-let-7i#-002172	1.36	0.946	29.498	29.498	29.498	13.677	0.174	1	1	1	0.236	0.236	0.236
	Normal control 1	hsa-miR-1286-002773	0	0	Undetermined				0.2
	Normal control 1	mmu-miR-495-001663	1.447	0.969	26.845	26.845	26.845	13.596	0.13	1	1	1	0.444	0.444	0.444
	Normal control 1	hsa-miR-520d-5p-002393	0	0	Undetermined				0.04
	Normal control 1	hsa-miR-497#-002368	1.099	0.755	33.867	33.867	33.867	18.045	0.064	1	1	1	0.025	0.025	0.025
	Normal control 1	hsa-miR-518e-002395	0.686	0	Undetermined				0.145
	Normal control 1	hsa-miR-599-001554	0	0	Undetermined				0.04
	Normal control 1	hsa-miR-608-001571	0	0	Undetermined				0.067
	Normal control 1	hsa-miR-658-001513	0	0	Undetermined				0.04
	Normal control 1	hsa-miR-323-3p-002227	1.405	0.941	26.739	26.739	26.739	13.49	0.07	1	1	1	0.207	0.207	0.207
	Normal control 1	hsa-miR-1244-002791	1.495	0.96	26.074	26.074	26.074	10.252	0.25	1	1	1	0.918	0.918	0.918
	Normal control 1	hsa-miR-1270-002807	1.296	0.988	30.913	30.913	30.913	15.091	0.111	1	1	1	0.66	0.66	0.66
	Normal control 1	hsa-miR-33b-002085	0.631	0.359	30.549	30.549	30.549	17.301	0.061	1	1	1
	Normal control 1	hsa-miR-23b#-002126	0.973	0.649	28.786	28.786	28.786	12.964	0.04	1	1	1
	Normal control 1	mmu-miR-129-3p-001184	0.927	0.441	27.247	27.247	27.247	13.998	0.054	1	1	1
	Normal control 1	hsa-miR-572-001614	1.248	0.928	29.178	29.178	29.178	13.356	0.09	1	1	1	0.149	0.149	0.149
	Normal control 1	hsa-miR-520a#-001168	0	0	Undetermined				0.04
	Normal control 1	dme-miR-7-000268	1.386	0.974	28.287	28.287	28.287	12.465	0.122	1	1	1	1.747	1.747	1.747
	Normal control 1	hsa-miR-363-001271	1.39	0.974	29.905	29.905	29.905	16.656	0.12	1	1	1	0.008	0.008	0.008
	Normal control 1	hsa-miR-625-002431	1.3	0.954	30.301	30.301	30.301	17.052	0.069	1	1	1	1.604	1.604	1.604
	Normal control 1	hsa-miR-220c-002211	0	0	Undetermined				0.04
	Normal control 1	hsa-miR-429-001024	1.465	0.988	28.689	28.689	28.689	15.441	0.281	1	1	1	0.096	0.096	0.096
	Normal control 1	hsa-miR-490-001037	0.967	0.871	30.289	30.289	30.289	17.041	0.04	1	1	1	0	0	0
	Normal control 1	hsa-miR-550-001544	1.297	0.891	30.406	30.406	30.406	14.584	0.086	1	1	1	0.227	0.227	0.227
	Normal control 1	hsa-miR-633-001574	0	0	Undetermined				0.079
	Normal control 1	hsa-miR-213-000516	1.321	0.921	28.253	28.253	28.253	12.431	0.156	1	1	1	0.306	0.306	0.306
	Normal control 1	hsa-miR-374-000563	1.5	0.978	22.137	22.137	22.137	8.889	0.145	1	1	1	0.524	0.524	0.524
	Normal control 1	hsa-let-7e#-002407	1.292	0.938	29.053	29.053	29.053	13.231	0.048	1	1	1	3.373	3.373	3.373
	Normal control 1	hsa-miR-142-5p-002248	1.367	0.975	28.461	28.461	28.461	15.213	0.202	1	1	1	0.152	0.152	0.152
	Normal control 1	hsa-miR-519e-002370	0	0	Undetermined				0.04
	Normal control 1	hsa-miR-206-000510	1.542	0.985	31.488	31.488	31.488	15.666	0.282	1	1	1	0.328	0.328	0.328
	Normal control 1	hsa-miR-532-3p-002355	1.385	0.77	22.928	22.928	22.928	9.68	0.102	1	1	1	0.427	0.427	0.427
	Normal control 1	hsa-miR-22-000398	1.259	0.937	22.276	22.276	22.276	9.027	0.1	1	1	1	0.033	0.033	0.033
	Normal control 1	hsa-miR-362-001273	1.346	0.983	25.954	25.954	25.954	12.705	0.162	1	1	1	0.943	0.943	0.943
	Normal control 1	hsa-miR-876-3p-002225	0	0	Undetermined				0.2
	Normal control 1	hsa-miR-1278-002851	1.43	0.937	35.468	35.468	35.468	19.646	0.297	1	1	1
	Normal control 1	hsa-miR-1200-002829	0.975	0.898	33.38	33.38	33.38	17.559	0.055	1	1	1
	Normal control 1	hsa-miR-938-002181	1.043	0.705	34.543	34.543	34.543	18.721	0.04	1	1	1
	Normal control 1	hsa-miR-526b-002382	0	0	Undetermined				0.132
	Normal control 1	hsa-miR-301-000528	1.36	0.976	27.879	27.879	27.879	14.63	0.198	1	1	1	0.309	0.309	0.309
	Normal control 1	hsa-miR-505#-002087	1.389	0.944	27.38	27.38	27.38	11.559	0.258	1	1	1	0.499	0.499	0.499
	Normal control 1	hsa-miR-25-000403	1.543	0.981	24.967	24.967	24.967	11.719	0.436	1	1	1	0.384	0.384	0.384
	Normal control 1	hsa-miR-506-001050	0	0	Undetermined				0.129
	Normal control 1	hsa-miR-1305-002867	0.897	0.379	34.075	34.075	34.075	18.254	0.04	1	1	1	0	0	0
	Normal control 1	hsa-miR-181c#-002333	0.87	0.571	30.206	30.206	30.206	14.385	0.04	1	1	1	0.025	0.025	0.025
	Normal control 1	hsa-miR-148b-000471	1.148	0.92	26.662	26.662	26.662	13.414	0.076	1	1	1	0.162	0.162	0.162
	Normal control 1	hsa-miR-1228#-002763	0.822	0.554	24.85	24.85	24.85	9.029	0.04	1	1	1	0.184	0.184	0.184
	Normal control 1	hsa-miR-361-3p-002116	0.854	0.545	31.194	31.194	31.194	15.372	0.046	1	1	1	0.003	0.003	0.003
	Normal control 1	hsa-miR-1288-002832	0	0	Undetermined				0.04
	Normal control 1	mmu-miR-187-001193	1.338	0.971	27.342	27.342	27.342	14.094	0.139	1	1	1	0.574	0.574	0.574
	Normal control 1	hsa-miR-214-002306	1.428	0.985	20.977	20.977	20.977	7.728	0.208	1	1	1	0.124	0.124	0.124
	Normal control 1	hsa-miR-875-3p-002204	0	0	Undetermined				0.04
	Normal control 1	hsa-miR-488-002357	0	0	Undetermined				0.04
	Normal control 1	hsa-miR-486-3p-002093	0.973	0.931	30.798	30.798	30.798	17.549	0.04	1	1	1	0.001	0.001	0.001
	Normal control 1	hsa-miR-492-001039	0.562	0.304	27.117	27.117	27.117	13.868	0.04	1	1	1	0.001	0.001	0.001
	Normal control 1	hsa-miR-1257-002910	0	0	Undetermined				0.098
	Normal control 1	hsa-miR-24-1#-002440	1.062	0.845	28.972	28.972	28.972	13.15	0.048	1	1	1	5.127	5.127	5.127
	Normal control 1	hsa-miR-1178-002777	0.419	0.116	16.037	16.037	16.037	0.215	0.04	1	1	1	41,948.035	41,948.035	41,948.035
	Normal control 1	hsa-miR-296-3p-002101	0	0	Undetermined				0.061
	Normal control 1	hsa-miR-15b-000390	1.364	0.963	23.046	23.046	23.046	9.797	0.251	1	1	1	0.722	0.722	0.722
	Normal control 1	hsa-miR-628-3p-002434	1.385	0.988	27.5	27.5	27.5	11.678	0.115	1	1	1	0.133	0.133	0.133
	Normal control 1	hsa-miR-593-001547	0.868	0.895	27.611	27.611	27.611	11.789	0.04	1	1	1
	Normal control 1	hsa-miR-892a-002195	0	0	Undetermined				0.04
	Normal control 1	hsa-miR-1275-002840	1.144	0.743	22.826	22.826	22.826	7.005	0.04	1	1	1	0.207	0.207	0.207
	Normal control 1	hsa-miR-1247-002893	1.277	0.992	24.206	24.206	24.206	8.384	0.083	1	1	1	0.025	0.025	0.025
	Normal control 1	hsa-miR-674-002021	0.723	0.818	31.344	31.344	31.344	18.096	0.04	1	1	1	0.31	0.31	0.31
	Normal control 1	hsa-miR-520g-001121	0.703	0.144	38.142	38.142	38.142	24.894	0.076	1	1	1	0.076	0.076	0.076
	Normal control 1	hsa-miR-146b-001097	1.488	0.98	17.045	17.045	17.045	3.797	0.324	1	1	1	0.153	0.153	0.153
	Normal control 1	hsa-miR-642-001592	1.401	0.975	31.551	31.551	31.551	18.302	0.259	1	1	1	0.097	0.097	0.097
	Normal control 1	hsa-miR-509-3-5p-002155	0	0	Undetermined				0.04
	Normal control 1	hsa-miR-510-002241	0	0	Undetermined				0.04
	Normal control 1	hsa-miR-367#-002121	0	0	Undetermined				0.04
	Normal control 1	hsa-miR-876-5p-002205	0.584	0.727	31.698	31.698	31.698	18.449	0.04	1	1	1	0.23	0.23	0.23
	Normal control 1	hsa-miR-107-000443	1.267	0.743	25.43	25.43	25.43	12.182	0.079	1	1	1	0.941	0.941	0.941
	Normal control 1	hsa-miR-521-001122	0.79	0.054	38.75	38.75	38.75	25.502	0.101	1	1	1
	Normal control 1	hsa-miR-20b-001014	1.501	0.972	22.328	22.328	22.328	9.079	0.172	1	1	1	0.312	0.312	0.312
	Normal control 1	hsa-miR-1254-002818	1.342	0.968	26.892	26.892	26.892	11.071	0.166	1	1	1	0.134	0.134	0.134
	Normal control 1	hsa-miR-708-002341	1.498	0.972	30.532	30.532	30.532	17.284	0.385	1	1	1	0.028	0.028	0.028
	Normal control 1	mmu-miR-96-000186	1.391	0.924	33.85	33.85	33.85	20.602	0.19	1	1	1	0.13	0.13	0.13
	Normal control 1	hsa-miR-501-3p-002435	0.617	0.821	29.998	29.998	29.998	16.75	0.04	1	1	1	0.003	0.003	0.003
	Normal control 1	hsa-miR-1825-002907	0.96	0.76	23.305	23.305	23.305	7.483	0.04	1	1	1	0.153	0.153	0.153
	Normal control 1	hsa-miR-654-001611	0.882	0.398	26.513	26.513	26.513	13.265	0.04	1	1	1	1.051	1.051	1.051
	Normal control 1	hsa-miR-133b-002247	1.196	0.936	28.604	28.604	28.604	15.356	0.06	1	1	1	0.066	0.066	0.066
	Cirrhotic Pool 2	hsa-miR-127-000452	1.48	0.984	26.106	26.106	26.106	9.23	0.322	6.805	6.805	6.805	1	1	1
	Cirrhotic Pool 2	hsa-miR-185-002271	1.482	0.988	26.321	26.321	26.321	9.444	0.227	8.023	8.023	8.023	1	1	1
	Cirrhotic Pool 2	hsa-miR-198-002273	0.81	0.611	22.301	22.301	22.301	5.425	0.04	795.886	795.886	795.886	1	1	1
	Cirrhotic Pool 2	hsa-miR-21-000397	1.296	0.873	19.657	19.657	19.657	2.781	0.068	6.291	6.291	6.291	1	1	1
	Cirrhotic Pool 2	hsa-miR-204-000508	1.467	0.989	24.997	24.997	24.997	8.121	0.117	3.915	3.915	3.915	1	1	1
	Cirrhotic Pool 2	hsa-miR-889-002202	0.647	0.413	24.324	24.324	24.324	7.447	0.053	302.966	302.966	302.966	1	1	1
	Cirrhotic Pool 2	hsa-miR-18b-002217	1.066	0.824	31.212	31.212	31.212	14.335	0.067	0.36	0.36	0.36	1	1	1
	Cirrhotic Pool 2	hsa-miR-184-000485	1.521	0.987	30.604	30.604	30.604	13.727	0.135	10.48	10.48	10.48	1	1	1
	Cirrhotic Pool 2	hsa-miR-1259-002796	0	0	Undetermined				0.049
	Cirrhotic Pool 2	hsa-miR-200c-002300	1.186	0.763	22.064	22.064	22.064	5.188	0.079	19.273	19.273	19.273	1	1	1
	Cirrhotic Pool 2	hsa-miR-672-002327	0.746	0.492	34.83	34.83	34.83	17.954	0.04				1	1	1
	Cirrhotic Pool 2	hsa-miR-21#-002438	1.369	0.986	24.739	24.739	24.739	5.446	0.266	21.463	21.463	21.463	1	1	1
	Cirrhotic Pool 2	hsa-miR-518b-001156	1.03	0.513	20.138	20.138	20.138	3.261	0.044	950,004.875	950,004.875	950,004.875	1	1	1
	Cirrhotic Pool 2	hsa-miR-510-002241	0	0	Undetermined				0.04
	Cirrhotic Pool 2	hsa-miR-520f-001120	0.948	0.734	21.244	21.244	21.244	4.367	0.049				1	1	1
	Cirrhotic Pool 2	hsa-miR-1248-002870	1.505	0.99	28.43	28.43	28.43	9.137	0.341	5.778	5.778	5.778	1	1	1
	Cirrhotic Pool 2	hsa-miR-1270-002807	1.097	0.875	33.786	33.786	33.786	14.492	0.111	1.514	1.514	1.514	1	1	1
	Cirrhotic Pool 2	hsa-miR-890-002209	0	0	Undetermined				0.052
	Cirrhotic Pool 2	hsa-miR-518a-5p-002396	0	0	Undetermined				0.2
	Cirrhotic Pool 2	hsa-miR-485-5p-001036	0.658	0.769	29.824	29.824	29.824	12.947	0.04	10.375	10.375	10.375	1	1	1
	Cirrhotic Pool 2	hsa-miR-202#-002362	0.554	0.082	8.709	8.709	8.709	-10.584	0.04				1	1	1
	Cirrhotic Pool 2	hsa-miR-486-001278	1.035	0.592	27.348	27.348	27.348	10.471	0.075	35.661	35.661	35.661	1	1	1
	Cirrhotic Pool 2	hsa-miR-654-001611	0.899	0.889	30.214	30.214	30.214	13.337	0.04	0.951	0.951	0.951	1	1	1
	Cirrhotic Pool 2	hsa-miR-1286-002773	0	0	Undetermined				0.2
	Cirrhotic Pool 2	hsa-miR-33a-002135	1.189	0.938	30.159	30.159	30.159	10.866	0.04	14.997	14.997	14.997	1	1	1
	Cirrhotic Pool 2	hsa-miR-517c-001153	1.075	0.869	34.341	34.341	34.341	17.465	0.097	0.694	0.694	0.694	1	1	1
	Cirrhotic Pool 2	hsa-miR-182-002334	1.34	0.863	35.548	35.548	35.548	18.671	0.239	3.285	3.285	3.285	1	1	1
	Cirrhotic Pool 2	hsa-miR-412-001023	1.197	0.862	29.671	29.671	29.671	12.795	0.04	44.853	44.853	44.853	1	1	1
	Cirrhotic Pool 2	hsa-miR-589-002409	0.798	0.276	36.794	36.794	36.794	19.918	0.056				1	1	1
	Cirrhotic Pool 2	hsa-miR-142-3p-000464	1.472	0.972	24.438	24.438	24.438	7.561	0.336	6.569	6.569	6.569	1	1	1
	Cirrhotic Pool 2	hsa-miR-598-001988	1.441	0.962	31.14	31.14	31.14	14.263	0.225	2.711	2.711	2.711	1	1	1
	Cirrhotic Pool 2	hsa-miR-20a#-002437	1.473	0.979	30.362	30.362	30.362	11.069	0.287	2.636	2.636	2.636	1	1	1
	Cirrhotic Pool 2	hsa-miR-376a-000565	1.451	0.985	27.412	27.412	27.412	10.535	0.297	12.902	12.902	12.902	1	1	1
	Cirrhotic Pool 2	hsa-miR-302c-000533	0.802	0.773	23.669	23.669	23.669	6.793	0.04	1,297.645	1,297.645	1,297.645	1	1	1
	Cirrhotic Pool 2	hsa-miR-135a-000460	1.386	0.948	30.615	30.615	30.615	13.738	0.165	58.2	58.2	58.2	1	1	1
	Cirrhotic Pool 2	hsa-miR-185#-002104	0	0	Undetermined				0.076
	Cirrhotic Pool 2	hsa-miR-520c-3p-002400	0.849	0.776	34.569	34.569	34.569	15.275	0.06	0.079	0.079	0.079	1	1	1
	Cirrhotic Pool 2	hsa-miR-628-5p-002433	1.454	0.949	28.191	28.191	28.191	11.314	0.464	7.582	7.582	7.582	1	1	1
	Cirrhotic Pool 2	hsa-miR-1260-002896	1.242	0.86	21.029	21.029	21.029	1.736	0.187	7.257	7.257	7.257	1	1	1
	Cirrhotic Pool 2	hsa-miR-371-3p-002124	0	0	Undetermined				0.04
	Cirrhotic Pool 2	hsa-miR-16-000391	1.456	0.979	20.901	20.901	20.901	4.025	0.255	5.469	5.469	5.469	1	1	1
	Cirrhotic Pool 2	hsa-miR-30a-3p-000416	1.534	0.937	21.651	21.651	21.651	2.357	0.312	6.011	6.011	6.011	1	1	1
	Cirrhotic Pool 2	hsa-miR-122#-002130	1.419	0.959	33.504	33.504	33.504	14.211	0.23	0.147	0.147	0.147	1	1	1
	Cirrhotic Pool 2	hsa-miR-340-002258	1.475	0.924	29.495	29.495	29.495	12.618	0.365	1.908	1.908	1.908	1	1	1
	Cirrhotic Pool 2	hsa-miR-105#-002168	0.495	0	Undetermined				0.04
	Cirrhotic Pool 2	hsa-miR-149-002255	1.332	0.924	26.356	26.356	26.356	9.479	0.11	2.33	2.33	2.33	1	1	1
	Cirrhotic Pool 2	hsa-miR-551a-001519	0.535	0.059	18.183	18.183	18.183	-1.11	0.04	305,950.469	305,950.469	305,950.469	1	1	1
	Cirrhotic Pool 2	RNU48-001006	1.399	0.869	18.969	18.149	18.149	0.064	0.172	1.526	1.526	1.526	1	1	1
	Cirrhotic Pool 2	RNU48-001006	1.383	0.869	17.329	18.149	18.149	0.064	0.172	1.526	1.526	1.526	1	1	1
	Cirrhotic Pool 2	hsa-miR-374a#-002125	0	0	Undetermined				0.215
	Cirrhotic Pool 2	hsa-miR-323-3p-002227	1.292	0.896	28.091	28.091	28.091	11.215	0.07	4.841	4.841	4.841	1	1	1
	Cirrhotic Pool 2	hsa-miR-518e#-002371	0	0	Undetermined				0.16
	Cirrhotic Pool 2	hsa-miR-99a-000435	1.267	0.752	22.056	22.056	22.056	5.18	0.118	4.423	4.423	4.423	1	1	1
	Cirrhotic Pool 2	hsa-miR-377-000566	0	0	Undetermined				0.045
	Cirrhotic Pool 2	hsa-miR-363#-001283	0	0	Undetermined				0.04
	Cirrhotic Pool 2	hsa-miR-155-002623	1.538	0.992	21.897	21.897	21.897	5.02	0.354	12.019	12.019	12.019	1	1	1
	Cirrhotic Pool 2	hsa-miR-191#-002678	0.902	0	39.979	39.979	39.979	20.686	0.174	0.005	0.005	0.005	1	1	1
	Cirrhotic Pool 2	hsa-miR-296-000527	1.152	0.946	29.626	29.626	29.626	12.749	0.05	8.227	8.227	8.227	1	1	1
	Cirrhotic Pool 2	hsa-miR-570-002347	1.052	0.707	35.172	35.172	35.172	18.295	0.04	0.479	0.479	0.479	1	1	1
	Cirrhotic Pool 2	hsa-miR-367#-002121	0	0	Undetermined				0.04
	Cirrhotic Pool 2	hsa-miR-891b-002210	0	0	Undetermined				0.04
	Cirrhotic Pool 2	hsa-miR-452#-002330	0.261	0.042	11.336	11.336	11.336	-7.958	0.04				1	1	1
	Cirrhotic Pool 2	hsa-miR-365-001020	1.227	0.972	27.008	27.008	27.008	10.131	0.158	0.295	0.295	0.295	1	1	1
	Cirrhotic Pool 2	hsa-miR-203-000507	1.442	0.985	26.06	26.06	26.06	9.184	0.321	3.951	3.951	3.951	1	1	1
	Cirrhotic Pool 2	hsa-miR-424-000604	1.456	0.982	30.532	30.532	30.532	13.655	0.244	5.18	5.18	5.18	1	1	1
	Cirrhotic Pool 2	hsa-miR-1275-002840	1.116	0.796	24.027	24.027	24.027	4.733	0.04	4.828	4.828	4.828	1	1	1
	Cirrhotic Pool 2	hsa-miR-936-002179	0	0	Undetermined				0.2
	Cirrhotic Pool 2	hsa-miR-943-002188	0.976	0.805	30.358	30.358	30.358	11.065	0.04	1,693.737	1,693.737	1,693.737	1	1	1
	Cirrhotic Pool 2	hsa-miR-644-001596	0.647	0.468	29.851	29.851	29.851	10.558	0.04	77.187	77.187	77.187	1	1	1
	Cirrhotic Pool 2	hsa-miR-138-002284	1.54	0.949	27.981	27.981	27.981	11.104	0.2	10.714	10.714	10.714	1	1	1
	Cirrhotic Pool 2	hsa-miR-20b#-002311	0	0	Undetermined				0.171
	Cirrhotic Pool 2	hsa-miR-654-3p-002239	0	0	Undetermined				0.11
	Cirrhotic Pool 2	hsa-miR-215-000518	0.964	0.532	21.588	21.588	21.588	4.712	0.04	0.779	0.779	0.779	1	1	1
	Cirrhotic Pool 2	hsa-miR-92a-2#-002138	0	0	Undetermined				0.075
	Cirrhotic Pool 2	hsa-miR-613-001586	0	0	Undetermined				0.054
	Cirrhotic Pool 2	hsa-miR-1179-002776	0.965	0.756	35.306	35.306	35.306	16.013	0.04	0.226	0.226	0.226	1	1	1
	Cirrhotic Pool 2	hsa-miR-221#-002096	0	0	Undetermined				0.062
	Cirrhotic Pool 2	hsa-miR-145-002278	1.356	0.964	18.278	18.278	18.278	1.401	0.165	11.076	11.076	11.076	1	1	1
	Cirrhotic Pool 2	hsa-miR-1263-002784	0.934	0.394	33.801	33.801	33.801	14.507	0.04				1	1	1
	Cirrhotic Pool 2	hsa-miR-450a-002303	1.542	0.968	30.56	30.56	30.56	13.684	0.136	6.08	6.08	6.08	1	1	1
	Cirrhotic Pool 2	hsa-miR-26a-2#-002115	1.203	0.884	31.715	31.715	31.715	12.422	0.062	0.985	0.985	0.985	1	1	1
	Cirrhotic Pool 2	hsa-miR-342-3p-002260	1.35	0.797	18.796	18.796	18.796	1.92	0.063	3.063	3.063	3.063	1	1	1
	Cirrhotic Pool 2	hsa-miR-125b-1#-002378	1.413	0.983	29.746	29.746	29.746	10.452	0.186	14.91	14.91	14.91	1	1	1
	Cirrhotic Pool 2	hsa-miR-326-000542	0	0.045	38.57	38.57	38.57	21.694	0.04	0.106	0.106	0.106	1	1	1
	Cirrhotic Pool 2	hsa-miR-608-001571	0.612	0	Undetermined				0.067
	Cirrhotic Pool 2	hsa-miR-302a-000529	1.054	0.575	18.695	18.695	18.695	1.818	0.042				1	1	1
	Cirrhotic Pool 2	hsa-miR-129#-002298	0	0	Undetermined				0.069
	Cirrhotic Pool 2	hsa-miR-548M-002775	0	0	Undetermined				0.2
	Cirrhotic Pool 2	U6 snRNA-001973	1.25	0.613	11.346	10.8	10.8	-7.285	0.04	8.143	8.143	8.143	1	1	1
	Cirrhotic Pool 2	U6 snRNA-001973	1.214	0.397	11.563	10.8	10.8	-7.285	0.04	8.143	8.143	8.143	1	1	1
	Cirrhotic Pool 2	U6 snRNA-001973	1.223	0.463	12.543	10.8	10.8	-7.285	0.04	8.143	8.143	8.143	1	1	1
	Cirrhotic Pool 2	U6 snRNA-001973	1.235	0.595	11.448	10.8	10.8	-7.285	0.04	8.143	8.143	8.143	1	1	1
	Cirrhotic Pool 2	U6 snRNA-001973	1.245	0.619	9.783	10.8	10.8	-7.285	0.04	8.143	8.143	8.143	1	1	1
	Cirrhotic Pool 2	U6 snRNA-001973	1.243	0.696	10.276	10.8	10.8	-7.285	0.04	8.143	8.143	8.143	1	1	1
	Cirrhotic Pool 2	U6 snRNA-001973	1.244	0.724	9.728	10.8	10.8	-7.285	0.04	8.143	8.143	8.143	1	1	1
	Cirrhotic Pool 2	U6 snRNA-001973	1.254	0.596	9.714	10.8	10.8	-7.285	0.04	8.143	8.143	8.143	1	1	1
	Cirrhotic Pool 2	hsa-miR-1255B-002801	1.229	0.936	32.16	32.16	32.16	12.867	0.151	0.757	0.757	0.757	1	1	1
	Cirrhotic Pool 2	hsa-miR-576-3p-002351	1.303	0.923	35.002	35.002	35.002	18.125	0.264	1.124	1.124	1.124	1	1	1
	Cirrhotic Pool 2	hsa-miR-518a-3p-002397	0	0	Undetermined				0.08
	Cirrhotic Pool 2	hsa-miR-497-001043	1.411	0.976	27	27	27	7.707	0.261	12.731	12.731	12.731	1	1	1
	Cirrhotic Pool 2	hsa-miR-448-001029	0	0	Undetermined				0.2
	Cirrhotic Pool 2	hsa-miR-485-3p-001277	1.391	0.963	30.809	30.809	30.809	13.932	0.054	3.445	3.445	3.445	1	1	1
	Cirrhotic Pool 2	hsa-miR-302d-000535	0.98	0.79	27.259	27.259	27.259	7.966	0.049				1	1	1
	Cirrhotic Pool 2	hsa-miR-122-002245	1.493	0.991	18.736	18.736	18.736	1.86	0.238	1.422	1.422	1.422	1	1	1
	Cirrhotic Pool 2	hsa-miR-92b#-002343	0.742	0.402	26.907	26.907	26.907	7.613	0.04	8,294.880	8,294.880	8,294.880	1	1	1
	Cirrhotic Pool 2	hsa-miR-26b#-002444	1.268	0.972	28.327	28.327	28.327	9.034	0.199	2.534	2.534	2.534	1	1	1
	Cirrhotic Pool 2	hsa-miR-503-001048	1.038	0.656	17.196	17.196	17.196	0.32	0.04	102,618.656	102,618.656	102,618.656	1	1	1
	Cirrhotic Pool 2	hsa-miR-455-3p-002244	1.292	0.973	27.967	27.967	27.967	11.09	0.162	1.432	1.432	1.432	1	1	1
	Cirrhotic Pool 2	hsa-miR-520a-001167	1.181	0.746	17.598	17.598	17.598	0.721	0.046	7,839,361.000	7,839,361.000	7,839,361.000	1	1	1
	Cirrhotic Pool 2	hsa-miR-125b-2#-002158	1.213	0.573	24.346	24.346	24.346	5.053	0.04	3.684	3.684	3.684	1	1	1
	Cirrhotic Pool 2	hsa-miR-1245-002823	0	0	Undetermined				0.056
	Cirrhotic Pool 2	mmu-miR-96-000186	1.306	0.865	34.535	34.535	34.535	17.659	0.19	7.693	7.693	7.693	1	1	1
	Cirrhotic Pool 2	hsa-miR-516a-5p-002416	0.659	0.133	37.241	37.241	37.241	20.364	0.087				1	1	1
	Cirrhotic Pool 2	hsa-miR-487b-001285	1.449	0.981	29.841	29.841	29.841	12.964	0.166	4.191	4.191	4.191	1	1	1
	Cirrhotic Pool 2	hsa-miR-383-000573	1.431	0.967	31.06	31.06	31.06	14.183	0.162	1	1	1	1	1	1
	Cirrhotic Pool 2	hsa-miR-335#-002185	1.364	0.979	26.668	26.668	26.668	7.375	0.078	10.585	10.585	10.585	1	1	1
	Cirrhotic Pool 2	hsa-miR-10b#-002315	1.414	0.987	28.17	28.17	28.17	8.877	0.258	13.775	13.775	13.775	1	1	1
	Cirrhotic Pool 2	hsa-miR-501-3p-002435	0.71	0.611	25.387	25.387	25.387	8.51	0.04	302.225	302.225	302.225	1	1	1
	Cirrhotic Pool 2	hsa-miR-9-000583	1.302	0.983	27.294	27.294	27.294	10.417	0.075	4.995	4.995	4.995	1	1	1
	Cirrhotic Pool 2	hsa-miR-106b-000442	1.494	0.984	24.274	24.274	24.274	7.397	0.198	6.372	6.372	6.372	1	1	1
	Cirrhotic Pool 2	hsa-miR-937-002180	0	0	Undetermined				0.09
	Cirrhotic Pool 2	hsa-miR-34a-000426	1.501	0.985	23.549	23.549	23.549	6.672	0.364	11.837	11.837	11.837	1	1	1
	Cirrhotic Pool 2	hsa-miR-214-002306	1.375	0.985	21.597	21.597	21.597	4.72	0.208	8.045	8.045	8.045	1	1	1
	Cirrhotic Pool 2	hsa-miR-583-001623	0	0.277	37.306	37.306	37.306	18.012	0.04				1	1	1
	Cirrhotic Pool 2	hsa-miR-425-5p-001516	1.266	0.909	25.232	25.232	25.232	8.355	0.078	1.828	1.828	1.828	1	1	1
	Cirrhotic Pool 2	mmu-miR-140-001187	1.513	0.983	22.851	22.851	22.851	5.974	0.354	10.332	10.332	10.332	1	1	1
	Cirrhotic Pool 2	hsa-miR-95-000433	1.456	0.785	24.405	24.405	24.405	7.528	0.114	11.834	11.834	11.834	1	1	1
	Cirrhotic Pool 2	hsa-miR-484-001821	1.487	0.957	21.514	21.514	21.514	4.637	0.274	1.266	1.266	1.266	1	1	1
	Cirrhotic Pool 2	hsa-miR-1184-002842	0.656	0	Undetermined				0.113
	Cirrhotic Pool 2	hsa-let-7g#-002118	0.991	0.891	34.083	34.083	34.083	14.789	0.075	0.133	0.133	0.133	1	1	1
	Cirrhotic Pool 2	hsa-miR-380-3p-000569	0	0.497	23.051	23.051	23.051	6.174	0.04	182,302.641	182,302.641	182,302.641	1	1	1
	Cirrhotic Pool 2	hsa-miR-33a#-002136	1.373	0.986	29.942	29.942	29.942	10.649	0.201	3.184	3.184	3.184	1	1	1
	Cirrhotic Pool 2	hsa-miR-151-3p-002254	1.526	0.986	22.493	22.493	22.493	3.2	0.286	8.19	8.19	8.19	1	1	1
	Cirrhotic Pool 2	hsa-miR-146a#-002163	0	0	Undetermined				0.175
	Cirrhotic Pool 2	hsa-miR-577-002675	1.161	0.856	36.426	36.426	36.426	17.132	0.227	1.312	1.312	1.312	1	1	1
	Cirrhotic Pool 2	hsa-miR-411#-002238	0.687	0	Undetermined				0.104
	Cirrhotic Pool 2	hsa-miR-27b#-002174	1.211	0.934	28.899	28.899	28.899	9.605	0.107	1.089	1.089	1.089	1	1	1
	Cirrhotic Pool 2	hsa-miR-657-001512	0	0	Undetermined				0.04
	Cirrhotic Pool 2	hsa-miR-1267-002885	1.158	0.878	29.778	29.778	29.778	10.485	0.06	23.237	23.237	23.237	1	1	1
	Cirrhotic Pool 2	hsa-miR-212-000515	1.347	0.711	26.122	26.122	26.122	9.246	0.1	8.147	8.147	8.147	1	1	1
	Cirrhotic Pool 2	hsa-miR-1303-002792	1.149	0.904	28.277	28.277	28.277	8.984	0.072	6.133	6.133	6.133	1	1	1
	Cirrhotic Pool 2	hsa-miR-1201-002781	1.085	0.859	25.354	25.354	25.354	6.06	0.062	2.865	2.865	2.865	1	1	1
	Cirrhotic Pool 2	hsa-miR-331-000545	1.408	0.952	21.814	21.814	21.814	4.937	0.2	3.992	3.992	3.992	1	1	1
	Cirrhotic Pool 2	hsa-miR-99b-000436	1.19	0.977	24.624	24.624	24.624	7.747	0.074	3.113	3.113	3.113	1	1	1
	Cirrhotic Pool 2	hsa-miR-1206-002878	0	0	Undetermined				0.2
	Cirrhotic Pool 2	hsa-miR-524-5p-001982	0.349	0	Undetermined				0.2
	Cirrhotic Pool 2	hsa-miR-506-001050	0	0	Undetermined				0.129
	Cirrhotic Pool 2	hsa-miR-19a-000395	1.367	0.961	27.106	27.106	27.106	10.229	0.238	4.246	4.246	4.246	1	1	1
	Cirrhotic Pool 2	hsa-miR-450b-5p-002207	0.981	0.332	35.963	35.963	35.963	19.086	0.048	0.14	0.14	0.14	1	1	1
	Cirrhotic Pool 2	hsa-miR-582-3p-002399	0	0	Undetermined				0.269
	Cirrhotic Pool 2	hsa-miR-196b-002215	1.429	0.962	33.935	33.935	33.935	17.058	0.3	1.844	1.844	1.844	1	1	1
	Cirrhotic Pool 2	hsa-miR-628-3p-002434	1.371	0.958	28.057	28.057	28.057	8.764	0.115	7.537	7.537	7.537	1	1	1
	Cirrhotic Pool 2	hsa-miR-513C-002756	0	0	Undetermined				0.04
	Cirrhotic Pool 2	hsa-miR-662-001607	0.971	0.897	29.352	29.352	29.352	10.059	0.04	15.554	15.554	15.554	1	1	1
	Cirrhotic Pool 2	hsa-miR-548J-002783	1.019	0.554	32.791	32.791	32.791	13.497	0.075	9.565	9.565	9.565	1	1	1
	Cirrhotic Pool 2	hsa-miR-216b-002326	1.405	0.966	30.511	30.511	30.511	13.635	0.154	2.425	2.425	2.425	1	1	1
	Cirrhotic Pool 2	hsa-miR-571-001613	1.053	0.966	27.009	27.009	27.009	7.716	0.04	40.334	40.334	40.334	1	1	1
	Cirrhotic Pool 2	hsa-miR-635-001578	1.406	0.944	33.792	33.792	33.792	14.499	0.165	2.102	2.102	2.102	1	1	1
	Cirrhotic Pool 2	hsa-miR-1292-002824	0	0	Undetermined				0.04
	Cirrhotic Pool 2	hsa-miR-1265-002790	0	0	Undetermined				0.2
	Cirrhotic Pool 2	hsa-miR-488-001106	0	0	Undetermined				0.04
	Cirrhotic Pool 2	hsa-miR-141-000463	1.45	0.768	26.171	26.171	26.171	9.294	0.135	96.032	96.032	96.032	1	1	1
	Cirrhotic Pool 2	hsa-miR-770-5p-002002	1.165	0.756	27.264	27.264	27.264	7.971	0.04	46.722	46.722	46.722	1	1	1
	Cirrhotic Pool 2	hsa-miR-298-002190	0	0	Undetermined				0.04
	Cirrhotic Pool 2	hsa-miR-19a#-002424	0	0	Undetermined				0.135
	Cirrhotic Pool 2	hsa-miR-181a-2#-002317	1.374	0.98	28.194	28.194	28.194	8.9	0.226	5.461	5.461	5.461	1	1	1
	Cirrhotic Pool 2	hsa-miR-548E-002881	0	0	Undetermined				0.045
	Cirrhotic Pool 2	hsa-miR-199a-3p-002304	1.411	0.884	22.107	22.107	22.107	5.23	0.236	8.754	8.754	8.754	1	1	1
	Cirrhotic Pool 2	hsa-miR-576-5p-002350	1.042	0.935	30.361	30.361	30.361	13.485	0.04	1.171	1.171	1.171	1	1	1
	Cirrhotic Pool 2	hsa-miR-665-002681	0.68	0.787	31.453	31.453	31.453	12.159	0.04				1	1	1
	Cirrhotic Pool 2	hsa-miR-488-002357	0	0	Undetermined				0.04
	Cirrhotic Pool 2	hsa-miR-567-001534	0.853	0.864	25.514	25.514	25.514	6.221	0.04	1,796.254	1,796.254	1,796.254	1	1	1
	Cirrhotic Pool 2	mmu-miR-137-001129	0.564	0	Undetermined				0.258
	Cirrhotic Pool 2	hsa-miR-409-5p-002331	0	0	Undetermined				0.062
	Cirrhotic Pool 2	hsa-miR-1826-002873	0	0	Undetermined				0.2
	Cirrhotic Pool 2	hsa-miR-615-5p-002353	0.953	0.726	32.338	32.338	32.338	15.461	0.04	18.195	18.195	18.195	1	1	1
	Cirrhotic Pool 2	hsa-miR-766-001986	1.056	0.876	26.182	26.182	26.182	6.889	0.078	2.521	2.521	2.521	1	1	1
	Cirrhotic Pool 2	hsa-miR-202-002363	0.827	0.269	33.737	33.737	33.737	16.86	0.045	0.398	0.398	0.398	1	1	1
	Cirrhotic Pool 2	hsa-miR-205-000509	0	0	Undetermined				0.04
	Cirrhotic Pool 2	hsa-miR-617-001591	1.216	0.932	33.413	33.413	33.413	14.12	0.1	6.43	6.43	6.43	1	1	1
	Cirrhotic Pool 2	hsa-miR-551b#-002346	0	0	Undetermined				0.04
	Cirrhotic Pool 2	hsa-miR-575-001617	0	0	Undetermined				0.04
	Cirrhotic Pool 2	hsa-miR-513B-002757	0.438	0	Undetermined				0.04
	Cirrhotic Pool 2	hsa-miR-518d-001159	0	0	Undetermined				0.04
	Cirrhotic Pool 2	hsa-miR-299-5p-000600	0.955	0.511	20.983	20.983	20.983	4.106	0.051	3,174.009	3,174.009	3,174.009	1	1	1
	Cirrhotic Pool 2	hsa-miR-338-3p-002252	1.263	0.879	28.098	28.098	28.098	11.222	0.081	27.34	27.34	27.34	1	1	1
	Cirrhotic Pool 2	hsa-miR-517b-001152	0	0	Undetermined				0.04
	Cirrhotic Pool 2	hsa-miR-744#-002325	1.201	0.951	28.677	28.677	28.677	9.383	0.061	2.936	2.936	2.936	1	1	1
	Cirrhotic Pool 2	hsa-miR-206-000510	1.552	0.944	33.352	33.352	33.352	14.059	0.282	3.047	3.047	3.047	1	1	1
	Cirrhotic Pool 2	hsa-miR-320-002277	1.433	0.969	20.921	20.921	20.921	4.045	0.311	5.56	5.56	5.56	1	1	1
	Cirrhotic Pool 2	hsa-miR-645-001597	0.894	0.344	37.911	37.911	37.911	18.617	0.04	5.492	5.492	5.492	1	1	1
	Cirrhotic Pool 2	hsa-miR-588-001542	0	0	Undetermined				0.2
	Cirrhotic Pool 2	hsa-miR-1272-002845	0.453	0.143	38.271	38.271	38.271	18.978	0.084				1	1	1
	Cirrhotic Pool 2	hsa-miR-149#-002164	0.805	0.932	27.307	27.307	27.307	8.014	0.04	1.183	1.183	1.183	1	1	1
	Cirrhotic Pool 2	hsa-miR-221-000524	1.338	0.949	27.304	27.304	27.304	10.427	0.165	5.725	5.725	5.725	1	1	1
	Cirrhotic Pool 2	hsa-miR-520d-5p-002393	0	0	Undetermined				0.04
	Cirrhotic Pool 2	hsa-miR-548K-002819	0	0	Undetermined				0.199
	Cirrhotic Pool 2	hsa-miR-193b#-002366	0.989	0.742	28.864	28.864	28.864	9.571	0.052	1.998	1.998	1.998	1	1	1
	Cirrhotic Pool 2	hsa-miR-483-5p-002338	1.458	0.988	25.327	25.327	25.327	8.45	0.278	1.928	1.928	1.928	1	1	1
	Cirrhotic Pool 2	hsa-miR-1324-002815	0.759	0.529	31.698	31.698	31.698	12.405	0.04				1	1	1
	Cirrhotic Pool 2	hsa-miR-378-000567	1.187	0.804	33.516	33.516	33.516	14.223	0.386	0.341	0.341	0.341	1	1	1
	Cirrhotic Pool 2	hsa-let-7f-1#-002417	0.715	0.765	33.045	33.045	33.045	13.751	0.04	1.832	1.832	1.832	1	1	1
	Cirrhotic Pool 2	hsa-miR-553-001521	0	0	Undetermined				0.046
	Cirrhotic Pool 2	hsa-let-7a-000377	1.351	0.83	24.115	24.115	24.115	7.239	0.056	1.957	1.957	1.957	1	1	1
	Cirrhotic Pool 2	hsa-miR-301-000528	1.371	0.942	29.813	29.813	29.813	12.936	0.198	3.235	3.235	3.235	1	1	1
	Cirrhotic Pool 2	hsa-miR-561-001528	0.797	0.34	17.993	17.993	17.993	1.117	0.04	7,716.646	7,716.646	7,716.646	1	1	1
	Cirrhotic Pool 2	hsa-miR-29b-000413	1.382	0.868	28.31	28.31	28.31	11.433	0.253	4.277	4.277	4.277	1	1	1
	Cirrhotic Pool 2	hsa-miR-107-000443	1.124	0.893	28.97	28.97	28.97	12.094	0.079	1.063	1.063	1.063	1	1	1
	Cirrhotic Pool 2	hsa-miR-922-002152	1.183	0.873	32.631	32.631	32.631	13.338	0.074	4.5	4.5	4.5	1	1	1
	Cirrhotic Pool 2	hsa-miR-299-3p-001015	0	0	Undetermined				0.069
	Cirrhotic Pool 2	hsa-miR-22#-002301	1.158	0.762	31.274	31.274	31.274	11.98	0.101	0.186	0.186	0.186	1	1	1
	Cirrhotic Pool 2	hsa-miR-591-001545	1.169	0.89	31.911	31.911	31.911	12.617	0.071				1	1	1
	Cirrhotic Pool 2	hsa-miR-886-3p-002194	1.326	0.847	23.241	23.241	23.241	6.365	0.062	1.544	1.544	1.544	1	1	1
	Cirrhotic Pool 2	hsa-miR-585-001625	0	0	Undetermined				0.04
	Cirrhotic Pool 2	hsa-miR-765-002643	0	0	Undetermined				0.04
	Cirrhotic Pool 2	hsa-miR-491-3p-002360	0	0	Undetermined				0.04
	Cirrhotic Pool 2	hsa-miR-518e-002395	1.278	0.831	33.04	33.04	33.04	16.163	0.145				1	1	1
	Cirrhotic Pool 2	hsa-miR-562-001529	0	0	Undetermined				0.04
	Cirrhotic Pool 2	hsa-miR-509-3-5p-002155	0.663	0.597	25.91	25.91	25.91	9.034	0.04				1	1	1
	Cirrhotic Pool 2	hsa-miR-146b-001097	1.496	0.989	17.963	17.963	17.963	1.086	0.324	6.546	6.546	6.546	1	1	1
	Cirrhotic Pool 2	hsa-miR-1244-002791	1.432	0.982	29.422	29.422	29.422	10.129	0.25	1.089	1.089	1.089	1	1	1
	Cirrhotic Pool 2	hsa-miR-20b-001014	1.457	0.968	24.277	24.277	24.277	7.4	0.172	3.202	3.202	3.202	1	1	1
	Cirrhotic Pool 2	hsa-miR-1251-002820	0	0	Undetermined				0.069
	Cirrhotic Pool 2	hsa-miR-142-5p-002248	1.385	0.964	29.369	29.369	29.369	12.493	0.202	6.59	6.59	6.59	1	1	1
	Cirrhotic Pool 2	hsa-miR-132#-002132	1.21	0.959	32.204	32.204	32.204	12.911	0.066	12.172	12.172	12.172	1	1	1
	Cirrhotic Pool 2	mmu-miR-374-5p-001319	1.345	0.577	24.745	24.745	24.745	7.868	0.295	3.599	3.599	3.599	1	1	1
	Cirrhotic Pool 2	hsa-miR-630-001563	0.886	0.367	36.116	36.116	36.116	16.823	0.059	0.415	0.415	0.415	1	1	1
	Cirrhotic Pool 2	hsa-miR-511-001111	1.521	0.987	29.924	29.924	29.924	13.047	0.373	1.645	1.645	1.645	1	1	1
	Cirrhotic Pool 2	hsa-miR-100#-002142	1.216	0.778	31.027	31.027	31.027	11.734	0.226	13.283	13.283	13.283	1	1	1
	Cirrhotic Pool 2	mmu-miR-496-001953	0.863	0.415	19.498	19.498	19.498	2.622	0.04				1	1	1
	Cirrhotic Pool 2	hsa-miR-339-3p-002184	1.317	0.936	26.287	26.287	26.287	9.41	0.196	6.73	6.73	6.73	1	1	1
	Cirrhotic Pool 2	hsa-miR-139-3p-002313	1.15	0.813	25.976	25.976	25.976	9.099	0.04	1.702	1.702	1.702	1	1	1
	Cirrhotic Pool 2	hsa-miR-103-000439	1.258	0.937	24.439	24.439	24.439	7.562	0.079	2.285	2.285	2.285	1	1	1
	Cirrhotic Pool 2	hsa-miR-579-002398	0	0	Undetermined				0.126
	Cirrhotic Pool 2	hsa-miR-223#-002098	1.43	0.98	27.586	27.586	27.586	8.293	0.217	5.677	5.677	5.677	1	1	1
	Cirrhotic Pool 2	hsa-miR-512-3p-001823	1.024	0.704	34.88	34.88	34.88	18.004	0.103				1	1	1
	Cirrhotic Pool 2	hsa-miR-218-1#-002094	0	0	Undetermined				0.044
	Cirrhotic Pool 2	hsa-miR-432#-001027	0	0.521	33.041	33.041	33.041	13.747	0.04	1.14	1.14	1.14	1	1	1
	Cirrhotic Pool 2	hsa-miR-101-002253	1.401	0.972	28.95	28.95	28.95	12.073	0.282	3.984	3.984	3.984	1	1	1
	Cirrhotic Pool 2	hsa-miR-708-002341	1.358	0.658	29.025	29.025	29.025	12.148	0.385	35.156	35.156	35.156	1	1	1
	Cirrhotic Pool 2	hsa-miR-24-1#-002440	0.874	0.438	34.802	34.802	34.802	15.508	0.048	0.195	0.195	0.195	1	1	1
	Cirrhotic Pool 2	rno-miR-29c#-001818	1.303	0.979	27.058	27.058	27.058	7.765	0.204	3.802	3.802	3.802	1	1	1
	Cirrhotic Pool 2	hsa-miR-1249-002868	0.533	0.474	31.147	31.147	31.147	11.853	0.04	3.308	3.308	3.308	1	1	1
	Cirrhotic Pool 2	hsa-miR-563-001530	0	0	Undetermined				0.2
	Cirrhotic Pool 2	ath-miR159a-000338	0	0	Undetermined				0.04
	Cirrhotic Pool 2	ath-miR159a-000338	0.45	0	Undetermined				0.04
	Cirrhotic Pool 2	hsa-miR-1238-002927	0	0	Undetermined				0.04
	Cirrhotic Pool 2	hsa-miR-516-3p-001149	1.326	0.57	29.551	29.551	29.551	10.258	0.099	40.702	40.702	40.702	1	1	1
	Cirrhotic Pool 2	hsa-miR-888#-002213	0.783	0.815	33.181	33.181	33.181	13.887	0.04				1	1	1
	Cirrhotic Pool 2	hsa-miR-140-3p-002234	1.304	0.941	27.303	27.303	27.303	10.426	0.105	2.307	2.307	2.307	1	1	1
	Cirrhotic Pool 2	hsa-miR-339-5p-002257	1.234	0.983	25.605	25.605	25.605	8.728	0.075	6.952	6.952	6.952	1	1	1
	Cirrhotic Pool 2	hsa-miR-302a#-002381	0.915	0.894	26.356	26.356	26.356	7.062	0.04				1	1	1
	Cirrhotic Pool 2	hsa-miR-361-3p-002116	0.787	0.625	26.329	26.329	26.329	7.035	0.046	323.35	323.35	323.35	1	1	1
	Cirrhotic Pool 2	hsa-miR-512-5p-001145	0.693	0.536	23.377	23.377	23.377	6.5	0.04	2,464.555	2,464.555	2,464.555	1	1	1
	Cirrhotic Pool 2	hsa-miR-524-001173	0	0	Undetermined				0.059
	Cirrhotic Pool 2	hsa-miR-7-2#-002314	0	0	Undetermined				0.058
	Cirrhotic Pool 2	hsa-miR-483-3p-002339	0.977	0.683	25.274	25.274	25.274	5.98	0.04	0.866	0.866	0.866	1	1	1
	Cirrhotic Pool 2	hsa-miR-656-001510	1.203	0.946	29.775	29.775	29.775	10.482	0.072	10.233	10.233	10.233	1	1	1
	Cirrhotic Pool 2	hsa-miR-136#-002100	1.354	0.986	27.968	27.968	27.968	8.675	0.244	15.257	15.257	15.257	1	1	1
	Cirrhotic Pool 2	hsa-miR-302b#-002119	0	0	Undetermined				0.04
	Cirrhotic Pool 2	hsa-miR-154#-000478	0	0	Undetermined				0.184
	Cirrhotic Pool 2	hsa-miR-1294-002785	0	0	Undetermined				0.094
	Cirrhotic Pool 2	hsa-miR-650-001603	1.214	0.872	23.425	23.425	23.425	4.132	0.04	8.337	8.337	8.337	1	1	1
	Cirrhotic Pool 2	hsa-miR-526b-002382	0	0	Undetermined				0.132
	Cirrhotic Pool 2	hsa-miR-99a#-002141	1.422	0.984	26.385	26.385	26.385	7.091	0.288	10.055	10.055	10.055	1	1	1
	Cirrhotic Pool 2	hsa-miR-1178-002777	0.529	0.51	34.865	34.865	34.865	15.571	0.04	0	0	0	1	1	1
	Cirrhotic Pool 2	hsa-miR-186-002285	1.546	0.983	22.848	22.848	22.848	5.971	0.362	5.245	5.245	5.245	1	1	1
	Cirrhotic Pool 2	hsa-miR-876-5p-002205	0.716	0.627	33.204	33.204	33.204	16.327	0.04	4.354	4.354	4.354	1	1	1
	Cirrhotic Pool 2	mmu-miR-499-001352	0.473	0	Undetermined				0.08
	Cirrhotic Pool 2	hsa-miR-98-000577	0.919	0.581	24.892	24.892	24.892	8.015	0.04	6.242	6.242	6.242	1	1	1
	Cirrhotic Pool 2	hsa-miR-220c-002211	0	0	Undetermined				0.04
	Cirrhotic Pool 2	hsa-miR-324-3p-002161	1.382	0.945	26.629	26.629	26.629	9.752	0.299	3.911	3.911	3.911	1	1	1
	Cirrhotic Pool 2	hsa-miR-587-001540	0.642	0.431	35.574	35.574	35.574	16.281	0.04	162.883	162.883	162.883	1	1	1
	Cirrhotic Pool 2	hsa-miR-194-000493	1.475	0.99	20.812	20.812	20.812	3.935	0.125	2.542	2.542	2.542	1	1	1
	Cirrhotic Pool 2	hsa-miR-1290-002863	1.493	0.976	25.086	25.086	25.086	5.792	0.139	10.333	10.333	10.333	1	1	1
	Cirrhotic Pool 2	hsa-miR-556-3p-002345	0	0	Undetermined				0.211
	Cirrhotic Pool 2	hsa-miR-543-002376	1.197	0.928	31.072	31.072	31.072	11.779	0.084	1.83	1.83	1.83	1	1	1
	Cirrhotic Pool 2	hsa-miR-143-002249	1.488	0.977	22.71	22.71	22.71	5.833	0.364	14.721	14.721	14.721	1	1	1
	Cirrhotic Pool 2	hsa-miR-454-002323	1.532	0.941	23.604	23.604	23.604	6.728	0.339	14.934	14.934	14.934	1	1	1
	Cirrhotic Pool 2	mmu-miR-129-3p-001184	0	0	Undetermined				0.054
	Cirrhotic Pool 2	hsa-miR-218-2#-002294	0	0	Undetermined				0.1
	Cirrhotic Pool 2	hsa-miR-1284-002903	0	0	Undetermined				0.057
	Cirrhotic Pool 2	mmu-miR-615-001960	0.775	0.093	35.814	35.814	35.814	18.938	0.04				1	1	1
	Cirrhotic Pool 2	hsa-miR-548b-5p-002408	1.346	0.924	31.189	31.189	31.189	14.312	0.097	2.936	2.936	2.936	1	1	1
	Cirrhotic Pool 2	hsa-miR-1264-002799	0	0	Undetermined				0.04
	Cirrhotic Pool 2	hsa-miR-1293-002905	0	0	Undetermined				0.04
	Cirrhotic Pool 2	hsa-miR-452-002329	1.472	0.969	26.026	26.026	26.026	9.149	0.108	10.77	10.77	10.77	1	1	1
	Cirrhotic Pool 2	hsa-miR-942-002187	1.321	0.979	29.935	29.935	29.935	10.641	0.192	12.48	12.48	12.48	1	1	1
	Cirrhotic Pool 2	hsa-miR-548a-001538	1.464	0.962	33.912	33.912	33.912	17.035	0.167				1	1	1
	Cirrhotic Pool 2	hsa-miR-208b-002290	0.559	0	Undetermined				0.264
	Cirrhotic Pool 2	hsa-miR-1250-002887	0	0	Undetermined				0.04
	Cirrhotic Pool 2	hsa-miR-520a#-001168	0	0	Undetermined				0.04
	Cirrhotic Pool 2	hsa-miR-873-002356	0	0	Undetermined				0.174
	Cirrhotic Pool 2	hsa-miR-101#-002143	0.935	0.437	32.001	32.001	32.001	12.708	0.04	9.914	9.914	9.914	1	1	1
	Cirrhotic Pool 2	hsa-miR-147b-002262	0.763	0.719	25.722	25.722	25.722	8.845	0.04	117.095	117.095	117.095	1	1	1
	Cirrhotic Pool 2	hsa-miR-16-1#-002420	1.439	0.976	29.236	29.236	29.236	9.942	0.1	3.283	3.283	3.283	1	1	1
	Cirrhotic Pool 2	hsa-miR-548d-001605	0	0	Undetermined				0.188
	Cirrhotic Pool 2	hsa-miR-601-001558	1.485	0.975	31.073	31.073	31.073	11.78	0.255	5.594	5.594	5.594	1	1	1
	Cirrhotic Pool 2	hsa-miR-517#-001113	0	0.057	32.456	32.456	32.456	13.163	0.04	50.84	50.84	50.84	1	1	1
	Cirrhotic Pool 2	hsa-miR-875-5p-002203	0.978	0.441	11.033	11.033	11.033	-8.26	0.04	19,822.611	19,822.611	19,822.611	1	1	1
	Cirrhotic Pool 2	hsa-miR-29a-002112	1.557	0.956	20.036	20.036	20.036	3.159	0.364	11.936	11.936	11.936	1	1	1
	Cirrhotic Pool 2	hsa-miR-933-002176	0	0	Undetermined				0.2
	Cirrhotic Pool 2	hsa-miR-220b-002206	0	0	Undetermined				0.04
	Cirrhotic Pool 2	hsa-miR-139-5p-002289	1.422	0.959	24.041	24.041	24.041	7.164	0.246	0.817	0.817	0.817	1	1	1
	Cirrhotic Pool 2	hsa-miR-548a-5p-002412	0	0	Undetermined				0.04
	Cirrhotic Pool 2	hsa-miR-924-002154	0	0	Undetermined				0.2
	Cirrhotic Pool 2	hsa-miR-376a#-002127	0.76	0.032	38.597	38.597	38.597	19.304	0.04	0.328	0.328	0.328	1	1	1
	Cirrhotic Pool 2	hsa-miR-941-002183	0.931	0.799	28.588	28.588	28.588	9.295	0.04	3.16	3.16	3.16	1	1	1
	Cirrhotic Pool 2	hsa-miR-935-002178	0	0	Undetermined				0.04
	Cirrhotic Pool 2	hsa-miR-520g-001121	0.72	0.168	38.053	38.053	38.053	21.176	0.076	13.156	13.156	13.156	1	1	1
	Cirrhotic Pool 2	hsa-miR-186#-002105	1.188	0.936	28.866	28.866	28.866	9.573	0.049	119.025	119.025	119.025	1	1	1
	Cirrhotic Pool 2	hsa-let-7e#-002407	0.917	0.88	34.279	34.279	34.279	14.985	0.048	0.296	0.296	0.296	1	1	1
	Cirrhotic Pool 2	hsa-miR-133b-002247	1.152	0.74	28.301	28.301	28.301	11.424	0.06	15.264	15.264	15.264	1	1	1
	Cirrhotic Pool 2	hsa-miR-1205-002778	0.604	0.396	25.048	25.048	25.048	5.755	0.04				1	1	1
	Cirrhotic Pool 2	hsa-miR-1282-002803	0.87	0.571	34.657	34.657	34.657	15.364	0.048	0.329	0.329	0.329	1	1	1
	Cirrhotic Pool 2	hsa-miR-106b#-002380	1.212	0.912	27.052	27.052	27.052	7.759	0.18	8.312	8.312	8.312	1	1	1
	Cirrhotic Pool 2	hsa-miR-30e-3p-000422	1.44	0.952	21.508	21.508	21.508	2.215	0.187	5.384	5.384	5.384	1	1	1
	Cirrhotic Pool 2	hsa-miR-10b-002218	1.401	0.985	25.806	25.806	25.806	8.929	0.19	10.231	10.231	10.231	1	1	1
	Cirrhotic Pool 2	hsa-miR-193b-002367	1.383	0.979	21.674	21.674	21.674	4.797	0.217	1.416	1.416	1.416	1	1	1
	Cirrhotic Pool 2	hsa-miR-146a-000468	1.486	0.979	19.528	19.528	19.528	2.651	0.215	5.719	5.719	5.719	1	1	1
	Cirrhotic Pool 2	hsa-miR-516b-001150	0	0	Undetermined				0.099
	Cirrhotic Pool 2	hsa-miR-548P-002798	0	0	Undetermined				0.104
	Cirrhotic Pool 2	hsa-miR-296-3p-002101	0	0	Undetermined				0.061
	Cirrhotic Pool 2	mmu-let-7d#-001178	0	0	Undetermined				0.04
	Cirrhotic Pool 2	hsa-miR-222#-002097	1.301	0.927	29.624	29.624	29.624	10.331	0.146	2.527	2.527	2.527	1	1	1
	Cirrhotic Pool 2	hsa-miR-589-001543	1.15	0.843	31.865	31.865	31.865	12.571	0.109	1.493	1.493	1.493	1	1	1
	Cirrhotic Pool 2	hsa-miR-182#-000483	0	0	Undetermined				0.04
	Cirrhotic Pool 2	hsa-miR-152-000475	1.544	0.994	23.812	23.812	23.812	6.936	0.222	6.989	6.989	6.989	1	1	1
	Cirrhotic Pool 2	hsa-miR-376c-002122	1.309	0.939	26.037	26.037	26.037	9.16	0.159	4.412	4.412	4.412	1	1	1
	Cirrhotic Pool 2	hsa-miR-33b-002085	0.633	0	Undetermined				0.061
	Cirrhotic Pool 2	hsa-miR-584-001624	0.936	0.909	23.869	23.869	23.869	4.575	0.04	12,846.060	12,846.060	12,846.060	1	1	1
	Cirrhotic Pool 2	hsa-miR-494-002365	1.31	0.975	27.328	27.328	27.328	10.452	0.181	10.056	10.056	10.056	1	1	1
	Cirrhotic Pool 2	hsa-miR-100-000437	1.308	0.831	21.46	21.46	21.46	4.583	0.085	3.885	3.885	3.885	1	1	1
	Cirrhotic Pool 2	hsa-miR-1274A-002883	1.379	0.755	17.196	17.196	17.196	-2.098	0.32	29.509	29.509	29.509	1	1	1
	Cirrhotic Pool 2	hsa-miR-423-5p-002340	1.187	0.868	28.648	28.648	28.648	11.771	0.093	2.328	2.328	2.328	1	1	1
	Cirrhotic Pool 2	hsa-miR-641-001585	0	0	Undetermined				0.056
	Cirrhotic Pool 2	hsa-miR-1269-002789	0.927	0.79	35.527	35.527	35.527	16.233	0.127	0.572	0.572	0.572	1	1	1
	Cirrhotic Pool 2	hsa-miR-126#-000451	1.454	0.982	21.324	21.324	21.324	2.031	0.138	23.16	23.16	23.16	1	1	1
	Cirrhotic Pool 2	hsa-miR-1226#-002758	1.078	0.956	30.398	30.398	30.398	11.105	0.073	3.161	3.161	3.161	1	1	1
	Cirrhotic Pool 2	hsa-miR-331-5p-002233	1.457	0.577	27.465	27.465	27.465	10.588	0.184	23.214	23.214	23.214	1	1	1
	Cirrhotic Pool 2	hsa-miR-515-5p-001112	0	0	Undetermined				0.172
	Cirrhotic Pool 2	hsa-miR-1203-002877	0.689	0.645	32.551	32.551	32.551	13.258	0.04	2.411	2.411	2.411	1	1	1
	Cirrhotic Pool 2	hsa-miR-335-000546	1.4	0.958	27.9	27.9	27.9	11.024	0.184	6.234	6.234	6.234	1	1	1
	Cirrhotic Pool 2	hsa-miR-1180-002847	1.199	0.965	30.078	30.078	30.078	10.785	0.108	2.066	2.066	2.066	1	1	1
	Cirrhotic Pool 2	hsa-miR-520h-001170	0	0	Undetermined				0.106
	Cirrhotic Pool 2	hsa-miR-1183-002841	1.212	0.935	29.882	29.882	29.882	10.589	0.066	14.754	14.754	14.754	1	1	1
	Cirrhotic Pool 2	hsa-miR-564-001531	0.69	0	Undetermined				0.063
	Cirrhotic Pool 2	hsa-miR-125a-3p-002199	1.419	0.971	28.724	28.724	28.724	11.848	0.145	5.353	5.353	5.353	1	1	1
	Cirrhotic Pool 2	hsa-miR-130a#-002131	0	0.404	30.895	30.895	30.895	11.601	0.167	17.418	17.418	17.418	1	1	1
	Cirrhotic Pool 2	hsa-miR-593-002411	0	0	Undetermined				0.04
	Cirrhotic Pool 2	hsa-let-7f-2#-002418	1.16	0.928	33.06	33.06	33.06	13.766	0.04	0.915	0.915	0.915	1	1	1
	Cirrhotic Pool 2	hsa-miR-193a-5p-002281	1.475	0.987	27.17	27.17	27.17	10.294	0.391	3.968	3.968	3.968	1	1	1
	Cirrhotic Pool 2	mmu-miR-495-001663	1.378	0.977	29.3	29.3	29.3	12.424	0.13	2.254	2.254	2.254	1	1	1
	Cirrhotic Pool 2	hsa-miR-671-3p-002322	1.343	0.945	30.913	30.913	30.913	14.036	0.236	4.465	4.465	4.465	1	1	1
	Cirrhotic Pool 2	mmu-miR-124a-001182	0.99	0.596	31.11	31.11	31.11	14.233	0.04	0.419	0.419	0.419	1	1	1
	Cirrhotic Pool 2	hsa-miR-541-002201	0	0	Undetermined				0.04
	Cirrhotic Pool 2	hsa-miR-29b-2#-002166	1.235	0.977	29.907	29.907	29.907	10.614	0.081	3.563	3.563	3.563	1	1	1
	Cirrhotic Pool 2	hsa-miR-92a-000431	1.447	0.976	24.227	24.227	24.227	7.351	0.193	1.483	1.483	1.483	1	1	1
	Cirrhotic Pool 2	hsa-miR-649-001602	1.013	0.903	32.675	32.675	32.675	13.382	0.073	1.51	1.51	1.51	1	1	1
	Cirrhotic Pool 2	hsa-miR-545-002267	1.47	0.979	32.475	32.475	32.475	15.598	0.157	54.115	54.115	54.115	1	1	1
	Cirrhotic Pool 2	hsa-miR-200b-002251	1.377	0.91	22.316	22.316	22.316	5.439	0.074	10.716	10.716	10.716	1	1	1
	Cirrhotic Pool 2	hsa-miR-190b-002263	1.519	0.949	31.809	31.809	31.809	12.515	0.29	3.608	3.608	3.608	1	1	1
	Cirrhotic Pool 2	hsa-miR-1304-002874	0.791	0.827	29.293	29.293	29.293	10	0.04	23.621	23.621	23.621	1	1	1
	Cirrhotic Pool 2	hsa-miR-337-3p-002157	0	0	Undetermined				0.04
	Cirrhotic Pool 2	hsa-let-7g-002282	1.363	0.911	22.35	22.35	22.35	5.473	0.309	6.311	6.311	6.311	1	1	1
	Cirrhotic Pool 2	hsa-miR-144-002676	1.075	0.733	33.426	33.426	33.426	14.133	0.058	1.271	1.271	1.271	1	1	1
	Cirrhotic Pool 2	hsa-miR-767-3p-001995	0	0	Undetermined				0.119
	Cirrhotic Pool 2	hsa-let-7i#-002172	1.33	0.972	30.888	30.888	30.888	11.595	0.174	4.234	4.234	4.234	1	1	1
	Cirrhotic Pool 2	hsa-miR-519c-001163	0.719	0.845	18.009	18.009	18.009	1.133	0.04				1	1	1
	Cirrhotic Pool 2	hsa-miR-708#-002342	0	0	Undetermined				0.04
	Cirrhotic Pool 2	hsa-miR-1305-002867	1.088	0.714	10.431	10.431	10.431	-8.862	0.04	145,444,000.000	145,444,000.000	145,444,000.000	1	1	1
	Cirrhotic Pool 2	hsa-miR-106a#-002170	0	0	Undetermined				0.04
	Cirrhotic Pool 2	hsa-miR-106a-002169	1.531	0.984	19.972	19.972	19.972	3.095	0.381	4.013	4.013	4.013	1	1	1
	Cirrhotic Pool 2	hsa-miR-129-000590	0	0	Undetermined				0.115
	Cirrhotic Pool 2	hsa-miR-509-5p-002235	1.071	0.902	30.366	30.366	30.366	13.489	0.04				1	1	1
	Cirrhotic Pool 2	hsa-miR-517a-002402	1.412	0.97	30.926	30.926	30.926	14.049	0.117	26.144	26.144	26.144	1	1	1
	Cirrhotic Pool 2	hsa-miR-621-001598	0	0.081	9.018	9.018	9.018	-10.275	0.04	6,529,617.000	6,529,617.000	6,529,617.000	1	1	1
	Cirrhotic Pool 2	hsa-miR-15a#-002419	1.312	0.976	30.902	30.902	30.902	11.609	0.244	1.945	1.945	1.945	1	1	1
	Cirrhotic Pool 2	hsa-miR-154-000477	0	0	Undetermined				0.067
	Cirrhotic Pool 2	hsa-miR-519e-002370	0	0	Undetermined				0.04
	Cirrhotic Pool 2	hsa-miR-24-000402	1.338	0.825	18.069	18.069	18.069	1.192	0.165	5.349	5.349	5.349	1	1	1
	Cirrhotic Pool 2	hsa-miR-1253-002894	0.839	0.605	32.32	32.32	32.32	13.027	0.04	5.766	5.766	5.766	1	1	1
	Cirrhotic Pool 2	hsa-miR-663B-002857	1.147	0.877	20.927	20.927	20.927	1.633	0.041	4.791	4.791	4.791	1	1	1
	Cirrhotic Pool 2	hsa-miR-582-5p-001983	0	0	Undetermined				0.099
	Cirrhotic Pool 2	hsa-miR-544-002265	0	0	Undetermined				0.2
	Cirrhotic Pool 2	hsa-miR-199b-000500	1.161	0.921	27.859	27.859	27.859	10.982	0.063	27.311	27.311	27.311	1	1	1
	Cirrhotic Pool 2	hsa-miR-135b#-002159	0	0	Undetermined				0.04
	Cirrhotic Pool 2	hsa-miR-603-001566	0	0	Undetermined				0.157
	Cirrhotic Pool 2	hsa-miR-125a-5p-002198	1.421	0.983	25.372	25.372	25.372	8.496	0.192	1.437	1.437	1.437	1	1	1
	Cirrhotic Pool 2	hsa-miR-136-000592	1.145	0.779	34.521	34.521	34.521	17.644	0.087	5.447	5.447	5.447	1	1	1
	Cirrhotic Pool 2	hsa-miR-875-3p-002204	0	0	Undetermined				0.04
	Cirrhotic Pool 2	hsa-miR-938-002181	0	0	Undetermined				0.04
	Cirrhotic Pool 2	hsa-miR-944-002189	1.463	0.945	33.187	33.187	33.187	13.894	0.326	92.207	92.207	92.207	1	1	1
	Cirrhotic Pool 2	rno-miR-7#-001338	1.342	0.806	24.068	24.068	24.068	4.775	0.114	7.469	7.469	7.469	1	1	1
	Cirrhotic Pool 2	hsa-miR-668-001992	0.751	0.715	34.677	34.677	34.677	15.383	0.04				1	1	1
	Cirrhotic Pool 2	hsa-miR-518d-5p-002389	0	0	Undetermined				0.054
	Cirrhotic Pool 2	hsa-miR-1255A-002805	0	0.216	25.823	25.823	25.823	6.53	0.04	764.637	764.637	764.637	1	1	1
	Cirrhotic Pool 2	hsa-let-7f-000382	1.138	0.77	28.14	28.14	28.14	11.263	0.082	2.095	2.095	2.095	1	1	1
	Cirrhotic Pool 2	hsa-miR-874-002268	0.861	0.675	27.061	27.061	27.061	10.184	0.04	7.28	7.28	7.28	1	1	1
	Cirrhotic Pool 2	hsa-miR-369-3p-000557	0	0	Undetermined				0.04
	Cirrhotic Pool 2	hsa-miR-522-002413	0	0	Undetermined				0.178
	Cirrhotic Pool 2	hsa-miR-23a#-002439	0	0	Undetermined				0.056
	Cirrhotic Pool 2	hsa-miR-363-001271	1.174	0.433	26.632	26.632	26.632	9.756	0.12	119.493	119.493	119.493	1	1	1
	Cirrhotic Pool 2	hsa-miR-618-001593	1.196	0.776	27.17	27.17	27.17	10.293	0.113	27.534	27.534	27.534	1	1	1
	Cirrhotic Pool 2	hsa-miR-489-002358	1.403	0.983	26.519	26.519	26.519	9.642	0.136	12.436	12.436	12.436	1	1	1
	Cirrhotic Pool 2	hsa-miR-493-002364	1.397	0.946	29.7	29.7	29.7	12.823	0.119	9.508	9.508	9.508	1	1	1
	Cirrhotic Pool 2	hsa-miR-320B-002844	1.457	0.973	27.884	27.884	27.884	8.591	0.189	4.354	4.354	4.354	1	1	1
	Cirrhotic Pool 2	hsa-miR-802-002004	0	0	Undetermined				0.04
	Cirrhotic Pool 2	hsa-miR-130a-000454	1.227	0.93	24.232	24.232	24.232	7.355	0.111	13.842	13.842	13.842	1	1	1
	Cirrhotic Pool 2	hsa-miR-193a-3p-002250	1.346	0.982	27.823	27.823	27.823	10.946	0.11	2.621	2.621	2.621	1	1	1
	Cirrhotic Pool 2	hsa-miR-151-5P-002642	1.32	0.966	25.177	25.177	25.177	5.884	0.236	2.868	2.868	2.868	1	1	1
	Cirrhotic Pool 2	hsa-miR-1283-002890	0	0	Undetermined				0.074
	Cirrhotic Pool 2	hsa-miR-655-001612	1.326	0.897	32.719	32.719	32.719	15.842	0.072	1.806	1.806	1.806	1	1	1
	Cirrhotic Pool 2	hsa-miR-218-000521	1.521	0.969	23.172	23.172	23.172	6.296	0.324	51.878	51.878	51.878	1	1	1
	Cirrhotic Pool 2	hsa-miR-532-001518	1.481	0.991	24.493	24.493	24.493	7.616	0.347	5.875	5.875	5.875	1	1	1
	Cirrhotic Pool 2	hsa-miR-634-001576	0	0	Undetermined				0.2
	Cirrhotic Pool 2	hsa-miR-675-002005	1.021	0.8	26.678	26.678	26.678	7.385	0.04	2.607	2.607	2.607	1	1	1
	Cirrhotic Pool 2	hsa-let-7c#-002405	0.795	0.885	31.232	31.232	31.232	11.938	0.04	3.184	3.184	3.184	1	1	1
	Cirrhotic Pool 2	hsa-miR-590-5p-001984	1.213	0.564	28.829	28.829	28.829	11.953	0.376	3.553	3.553	3.553	1	1	1
	Cirrhotic Pool 2	hsa-miR-652-002352	1.379	0.932	26.28	26.28	26.28	9.403	0.243	10.397	10.397	10.397	1	1	1
	Cirrhotic Pool 2	hsa-miR-27b-000409	1.501	0.99	25.222	25.222	25.222	8.345	0.352	5.157	5.157	5.157	1	1	1
	Cirrhotic Pool 2	hsa-miR-1182-002830	0	0	Undetermined				0.04
	Cirrhotic Pool 2	hsa-miR-505-002089	1.409	0.982	28.087	28.087	28.087	11.21	0.105	5.499	5.499	5.499	1	1	1
	Cirrhotic Pool 2	hsa-miR-145#-002149	1.48	0.95	27.999	27.999	27.999	8.705	0.289	6.547	6.547	6.547	1	1	1
	Cirrhotic Pool 2	hsa-miR-375-000564	1.515	0.928	24.81	24.81	24.81	7.933	0.227	2.228	2.228	2.228	1	1	1
	Cirrhotic Pool 2	hsa-miR-624-001557	0	0	Undetermined				0.155
	Cirrhotic Pool 2	hsa-miR-876-3p-002225	0	0	Undetermined				0.2
	Cirrhotic Pool 2	hsa-miR-30d-000420	1.36	0.87	23.362	23.362	23.362	4.069	0.153	3.095	3.095	3.095	1	1	1
	Cirrhotic Pool 2	hsa-miR-605-001568	0.895	0.497	32.112	32.112	32.112	12.819	0.04	7.196	7.196	7.196	1	1	1
	Cirrhotic Pool 2	hsa-miR-34a#-002316	1.431	0.969	25.637	25.637	25.637	6.344	0.342	10.757	10.757	10.757	1	1	1
	Cirrhotic Pool 2	hsa-miR-502-001109	1.323	0.912	29.856	29.856	29.856	12.979	0.081	17.961	17.961	17.961	1	1	1
	Cirrhotic Pool 2	hsa-miR-554-001522	0	0	Undetermined				0.041
	Cirrhotic Pool 2	hsa-miR-586-001539	0	0	Undetermined				0.057
	Cirrhotic Pool 2	hsa-miR-431-001979	1.069	0.786	27.032	27.032	27.032	10.155	0.05	5.483	5.483	5.483	1	1	1
	Cirrhotic Pool 2	hsa-miR-518c#-001158	0	0	Undetermined				0.04
	Cirrhotic Pool 2	hsa-miR-219-000522	0	0	Undetermined				0.105
	Cirrhotic Pool 2	hsa-miR-378-002243	1.275	0.601	10.551	10.551	10.551	-8.743	0.141	2,419.960	2,419.960	2,419.960	1	1	1
	Cirrhotic Pool 2	hsa-miR-769-5p-001998	1.056	0.703	30.024	30.024	30.024	10.731	0.096	0.531	0.531	0.531	1	1	1
	Cirrhotic Pool 2	hsa-miR-1252-002860	0	0	Undetermined				0.2
	Cirrhotic Pool 2	hsa-miR-596-001550	0.829	0.695	23.199	23.199	23.199	3.906	0.04	6.159	6.159	6.159	1	1	1
	Cirrhotic Pool 2	hsa-miR-19b-000396	1.32	0.96	20.149	20.149	20.149	3.272	0.166	3.222	3.222	3.222	1	1	1
	Cirrhotic Pool 2	hsa-miR-181c#-002333	0.893	0.879	28.341	28.341	28.341	9.047	0.04	40.422	40.422	40.422	1	1	1
	Cirrhotic Pool 2	hsa-miR-429-001024	1.436	0.962	28.933	28.933	28.933	12.056	0.281	10.442	10.442	10.442	1	1	1
	Cirrhotic Pool 2	hsa-miR-623-001555	0	0	Undetermined				0.04
	Cirrhotic Pool 2	hsa-miR-548d-5p-002237	1.04	0.3	25.598	25.598	25.598	8.722	0.074	234.748	234.748	234.748	1	1	1
	Cirrhotic Pool 2	hsa-miR-30c-000419	1.498	0.99	20.894	20.894	20.894	4.018	0.271	2.594	2.594	2.594	1	1	1
	Cirrhotic Pool 2	hsa-miR-646-001599	0.67	0.535	25.779	25.779	25.779	6.486	0.04	2,341.183	2,341.183	2,341.183	1	1	1
	Cirrhotic Pool 2	hsa-miR-453-002318	0	0	Undetermined				0.083
	Cirrhotic Pool 2	hsa-miR-658-001513	0	0	Undetermined				0.04
	Cirrhotic Pool 2	mmu-miR-379-001138	1.425	0.949	27.469	27.469	27.469	10.592	0.096	3.688	3.688	3.688	1	1	1
	Cirrhotic Pool 2	hsa-miR-148b#-002160	1.429	0.901	32.4	32.4	32.4	13.107	0.435	1.738	1.738	1.738	1	1	1
	Cirrhotic Pool 2	hsa-miR-920-002150	0	0	Undetermined				0.04
	Cirrhotic Pool 2	hsa-miR-345-002186	1.352	0.966	26.945	26.945	26.945	10.068	0.38	1.106	1.106	1.106	1	1	1
	Cirrhotic Pool 2	hsa-miR-1274B-002884	1.446	0.985	13.662	13.662	13.662	-5.631	0.253	2.614	2.614	2.614	1	1	1
	Cirrhotic Pool 2	hsa-miR-1288-002832	0.665	0.259	31.786	31.786	31.786	12.493	0.04				1	1	1
	Cirrhotic Pool 2	hsa-miR-195-000494	1.475	0.978	22.907	22.907	22.907	6.031	0.256	17.303	17.303	17.303	1	1	1
	Cirrhotic Pool 2	hsa-miR-1289-002871	0	0	Undetermined				0.04
	Cirrhotic Pool 2	hsa-miR-128a-002216	1.414	0.969	30.316	30.316	30.316	13.439	0.257	1.442	1.442	1.442	1	1	1
	Cirrhotic Pool 2	hsa-miR-490-001037	0.983	0.626	20.456	20.456	20.456	3.579	0.04	11,279.081	11,279.081	11,279.081	1	1	1
	Cirrhotic Pool 2	hsa-miR-190-000489	0	0	Undetermined				0.153
	Cirrhotic Pool 2	hsa-miR-614-001587	0	0	Undetermined				0.04
[truncated: 17,971 more rows]

## Sheet: 2-Data_support_table2
TITLE: miRNA deregulated in HCCs arisen in non-cirrhotic (nc-HCC) or cirrhotic (c-HCC) background, compared to the normal or cirrhotic controls
Biological Group Name	Target Name	Adjusted Cт Mean	ΔCт Mean	ΔCт SE	RQ	Adjusted P-Value		Legend
Non Cirrotici	hsa-miR-149#-002164	28.889	12.069	0.71	0.071	0		red font	normalization with the normal liver control pool
Non Cirrotici	hsa-miR-188-3p-002106	32.963	16.376	2.509	0.002	0.001		black font	normalization with the cirrhotic liver pool
Non Cirrotici	ath-miR159a-000338	29.274	15.733	1.144	0.002	0.001
Non Cirrotici	hsa-miR-543-002376	31.078	14.258	0.307	0.328	0.006
Non Cirrotici	hsa-miR-483-3p-002339	28.23	10.763	1.195	0.031	0.006
Non Cirrotici	hsa-miR-640-001584	35.036	17.48	0.454	0	0.006
Non Cirrotici	hsa-miR-1259-002796	34.858	17.573	0.753	0.15	0.01
Non Cirrotici	hsa-miR-23a#-002439	35.168	17.925	0.384	0.161	0.01
Non Cirrotici	hsa-let-7f-2#-002418	33.801	16.981	0.909	0.099	0.018
Non Cirrotici	hsa-miR-1243-002854	32.921	16.658	4.608	0	0.018
Non Cirrotici	hsa-miR-136#-002100	31.661	14.194	0.402	0.333	0.034
Non Cirrotici	hsa-miR-562-001529	21.746	5.781	0.606	0.192	0.034
Cirrotici	hsa-miR-1178-002777	32.586	12.643	1.88	0	0
Non Cirrotici	hsa-miR-200a-000502	26.444	10.811	1.126	0.034	0
Non Cirrotici	hsa-miR-621-001598	30.92	12.951	2.439	0	0
Non Cirrotici	hsa-miR-604-001567	28.522	11.232	1.082	0.01	0
Non Cirrotici	hsa-miR-452#-002330	30.545	13.47	3.778	0	0
Non Cirrotici	hsa-miR-662-001607	31.954	14.93	0.727	0.034	0
Non Cirrotici	hsa-miR-26a-1#-002443	29.002	11.534	0.547	0.092	0
Non Cirrotici	hsa-miR-584-001624	27.931	10.463	1.055	0.017	0
Non Cirrotici	hsa-miR-378-002243	18.477	1.01	1.51	0.001	0
Non Cirrotici	hsa-miR-543-002376	31.078	14.258	0.307	0.179	0
Non Cirrotici	hsa-miR-639-001583	28.808	11.34	1.329	0.001	0
Non Cirrotici	hsa-miR-136#-002100	31.661	14.194	0.402	0.022	0
Non Cirrotici	hsa-miR-145#-002149	29.721	12.254	0.333	0.085	0
Non Cirrotici	hsa-miR-875-5p-002203	28.739	11.45	3.605	0	0
Non Cirrotici	hsa-miR-141-000463	29.992	14.359	1.037	0.03	0
Non Cirrotici	hsa-miR-199b-000500	30.899	15.266	0.781	0.051	0
Non Cirrotici	hsa-miR-889-002202	32.082	16.312	0.922	0.002	0
Non Cirrotici	hsa-miR-126#-000451	24.177	6.71	0.185	0.039	0
Non Cirrotici	hsa-miR-1255A-002805	32.023	14.975	0.79	0.003	0
Non Cirrotici	hsa-miR-223#-002098	28.824	11.356	0.384	0.12	0
Non Cirrotici	hsa-miR-656-001510	34.064	16.621	1.162	0.014	0
Non Cirrotici	hsa-miR-551a-001519	33.527	16.384	1.041	0	0
Non Cirrotici	hsa-miR-30c-1#-002108	26.137	8.695	2.475	0	0
Non Cirrotici	hsa-miR-1290-002863	28.223	10.755	1.137	0.032	0
Non Cirrotici	hsa-miR-650-001603	25.508	8.041	0.609	0.067	0
Non Cirrotici	hsa-miR-596-001550	24.742	7.274	0.758	0.097	0
Non Cirrotici	hsa-miR-130a#-002131	33.487	16.86	0.786	0.026	0
Non Cirrotici	hsa-miR-720-002895	14.497	-2.971	0.254	0.24	0
Non Cirrotici	hsa-miR-188-3p-002106	32.963	16.376	2.509	0	0
Non Cirrotici	hsa-miR-1208-002880	32.203	14.735	0.61	0.044	0
Non Cirrotici	hsa-miR-338-3p-002252	30.975	15.341	0.831	0.058	0
Non Cirrotici	hsa-miR-200a#-001011	30.359	13.795	0.625	0.018	0
Non Cirrotici	hsa-miR-380-5p-000570	32.111	15.675	0.427	0.062	0
Non Cirrotici	hsa-miR-644-001596	32.511	15.691	0.688	0.028	0
Non Cirrotici	hsa-miR-497-001043	29.058	12.639	0.47	0.033	0
Non Cirrotici	hsa-miR-125b-2#-002158	25.696	8.229	0.564	0.111	0
Non Cirrotici	hsa-miR-590-3P-002677	28.431	10.964	0.821	0.103	0
Non Cirrotici	hsa-miR-214#-002293	27.261	9.793	0.535	0.042	0
Non Cirrotici	hsa-miR-31#-002113	30.391	14.185	0.762	0.058	0
Non Cirrotici	hsa-miR-149#-002164	28.889	12.069	0.71	0.06	0
Non Cirrotici	hsa-miR-1305-002867	26.159	8.691	2.744	0	0
Non Cirrotici	hsa-miR-200b-002251	26.019	10.386	1.396	0.032	0
Non Cirrotici	hsa-miR-20a#-002437	31.189	13.876	0.52	0.143	0
Non Cirrotici	hsa-miR-200a-000502	26.444	10.811	1.126	0.034	0
Non Cirrotici	hsa-miR-1247-002893	25.8	8.333	0.743	0.026	0
Non Cirrotici	hsa-miR-1288-002832	33.373	17.044	0.716	0.043	0.001
Non Cirrotici	hsa-miR-24-2#-002441	30.456	13.636	0.565	0.125	0.001
Non Cirrotici	hsa-miR-571-001613	28.127	10.659	0.583	0.13	0.001
Non Cirrotici	hsa-miR-519a-002415	27.638	12.004	1.69	0.003	0.001
Non Cirrotici	hsa-miR-429-001024	30.19	14.609	0.715	0.17	0.002
Non Cirrotici	hsa-miR-483-3p-002339	28.23	10.763	1.195	0.036	0.002
Non Cirrotici	hsa-miR-646-001599	31.904	13.251	2.149	0.009	0.002
Non Cirrotici	hsa-miR-380-3p-000569	29.05	14.649	2.98	0.003	0.002
Non Cirrotici	hsa-miR-144#-002148	31.334	14.77	1.042	0.105	0.002
Non Cirrotici	hsa-miR-186#-002105	29.752	12.285	0.692	0.153	0.004
Non Cirrotici	hsa-miR-136-000592	36.287	20.38	0.48	0.15	0.005
Non Cirrotici	hsa-miR-200c-002300	23.428	7.795	0.876	0.164	0.005
Non Cirrotici	hsa-miR-609-001573	27.194	10.159	3.036	0.002	0.005
Non Cirrotici	hsa-miR-769-3p-002003	28.77	11.95	0.356	0.313	0.005
Non Cirrotici	hsa-let-7f-2#-002418	33.801	16.981	0.909	0.108	0.006
Non Cirrotici	hsa-miR-483-5p-002338	28.879	13.246	1.108	0.036	0.007
Non Cirrotici	hsa-miR-542-5p-002240	29.745	14.112	0.71	0.162	0.007
Non Cirrotici	hsa-miR-99a#-002141	27.715	10.248	0.596	0.112	0.007
Non Cirrotici	hsa-miR-520b-001116	31.37	16.155	2.359	0	0.008
Non Cirrotici	hsa-miR-26a-2#-002115	30.572	14.613	0.484	0.219	0.009
Non Cirrotici	hsa-miR-202#-002362	24.996	6.916	8.869	0	0.009
Non Cirrotici	hsa-miR-617-001591	31.88	15.916	0.408	0.288	0.01
Non Cirrotici	hsa-miR-376a-000565	29.29	13.657	0.884	0.115	0.01
Non Cirrotici	hsa-miR-29b-2#-002166	30.605	13.095	0.599	0.179	0.011
Non Cirrotici	hsa-miR-213-000516	29.687	12.867	0.52	0.226	0.014
Non Cirrotici	hsa-miR-377#-002128	27.676	11.095	3.306	0	0.016
Non Cirrotici	hsa-miR-30a-5p-000417	20.873	3.405	0.452	0.226	0.016
Non Cirrotici	hsa-miR-520D-3P-002743	25.638	8.349	2.581	0	0.018
Non Cirrotici	hsa-miR-1274B-002884	13.505	-3.962	0.421	0.314	0.019
Non Cirrotici	hsa-miR-331-5p-002233	28.798	13.165	0.69	0.168	0.021
Non Cirrotici	hsa-miR-1260-002896	21.574	4.107	0.515	0.193	0.025
Non Cirrotici	hsa-miR-30a-3p-000416	21.376	3.909	0.378	0.341	0.026
Non Cirrotici	hsa-miR-635-001578	33.809	17.084	0.841	0.167	0.03
Non Cirrotici	hsa-let-7a#-002307	31.224	13.911	0.757	0.083	0.035
Non Cirrotici	hsa-miR-886-5p-002193	22.21	6.577	1.027	0.093	0.035
Non Cirrotici	hsa-miR-195#-002107	29.901	12.222	1.49	0.016	0.041
Non Cirrotici	hsa-miR-199a-000498	29.349	14.13	1.002	0.05	0.042
Non Cirrotici	hsa-miR-486-3p-002093	30.025	14.392	1.431	0.013	0.044
Non Cirrotici	hsa-miR-181c#-002333	29.332	12.019	0.835	0.127	0.044
Non Cirrotici	hsa-miR-132#-002132	31.472	15.304	0.713	0.19	0.049
Cirrotici	hsa-miR-145#-002149	29.561	11.096	0.329	0.191	0
Cirrotici	hsa-miR-214#-002293	27.424	8.958	0.585	0.075	0
Cirrotici	hsa-miR-99a#-002141	27.491	9.026	0.474	0.262	0.048
Cirrotici	hsa-miR-944-002189	33.92	16.437	1.12	0.172	0.008
Cirrotici	hsa-miR-92b#-002343	32.805	15.02	1.199	0.006	0
Cirrotici	hsa-miR-875-5p-002203	23.041	4.576	2.787	0	0.003
Cirrotici	hsa-miR-665-002681	33.014	15.956	1.35	0.072	0.014
Cirrotici	hsa-miR-656-001510	32.364	14.689	0.886	0.054	0
Cirrotici	hsa-miR-621-001598	30.985	12.384	1.02	0	0
Cirrotici	hsa-miR-609-001573	22.935	4.662	0.894	0.071	0.021
Cirrotici	hsa-miR-591-001545	32.919	14.597	0.775	0.253	0.034
Cirrotici	hsa-miR-590-3P-002677	29.556	11.09	0.578	0.094	0
Cirrotici	hsa-miR-551a-001519	32.322	13.975	1.284	0	0
Cirrotici	hsa-miR-520D-3P-002743	23.463	5.254	2.562	0.001	0
Cirrotici	hsa-miR-452#-002330	32.714	13.908	1.674	0	0
Cirrotici	hsa-miR-380-5p-000570	32.714	14.081	0.894	0.189	0.023
Cirrotici	hsa-miR-378-002243	17.583	-0.883	1.593	0.004	0.002
Cirrotici	hsa-miR-338-5P-002658	29.449	10.984	1.434	0.01	0
Cirrotici	hsa-miR-338-3p-002252	31.617	14.434	0.957	0.108	0
Cirrotici	hsa-miR-31#-002113	30.953	12.432	0.631	0.196	0.001
Cirrotici	hsa-miR-30c-1#-002108	23.684	5.888	2.481	0	0
Cirrotici	hsa-miR-26a-1#-002443	29.991	11.526	0.57	0.092	0
Cirrotici	hsa-miR-20a#-002437	31.314	13.105	0.533	0.244	0.009
Cirrotici	hsa-miR-202#-002362	34.821	16.742	1.013	0	0
Cirrotici	hsa-miR-200a#-001011	30.855	12.01	0.704	0.062	0.001
Cirrotici	hsa-miR-188-3p-002106	31.189	12.599	1.646	0.002	0
Cirrotici	hsa-miR-149#-002164	29.328	11.12	0.522	0.116	0.012
Cirrotici	hsa-miR-145#-002149	29.561	11.096	0.329	0.191	0
Cirrotici	hsa-miR-136#-002100	30.809	12.343	0.661	0.079	0
Cirrotici	hsa-miR-132#-002132	33.431	15.551	0.733	0.16	0.05
Cirrotici	hsa-miR-130b#-002114	29.248	10.783	0.603	228.106	0.018
Cirrotici	hsa-miR-1305-002867	21.592	3.462	3.262	0	0.035
Cirrotici	hsa-miR-126#-000451	24.03	5.565	0.635	0.086	0
Cirrotici	hsa-miR-125b-1#-002378	30.7	12.235	0.507	0.291	0.008
Cirrotici	hsa-miR-1255B-002801	29.696	11.231	1.258	3.108	0.05
Cirrotici	hsa-miR-101#-002143	33.893	16.12	0.799	0.094	0

## Sheet: 3-Data_support_table 3
TITLE: miRNA deregulated in each pattern of vascular modification in HCC compared to the normal or cirrhotic controls
Biological Group Name	Target Name	Adjusted Cт Mean	ΔCт Mean	ΔCт SE	RQ	Adjusted P-Value		Legend
Pattern a	hsa-miR-551b#-002346	27.606	9.635	0.001	144.523	0.047		red font	normalization with the normal liver control pool
Pattern b	hsa-miR-149#-002164	28.776	11.442	0.553	0.11	0.008		black font	normalization with the cirrhotic liver pool
Pattern b	hsa-miR-1178-002777	30.74	12.433	1.029	0	0.026
Pattern b	hsa-miR-1243-002854	29.263	13.05	0.999	0	0.028
Pattern b	hsa-miR-23a#-002439	35.62	18.933	0.313	0.08	0.044
Pattern c	hsa-miR-149#-002164	29.828	12.227	0.762	0.064	0
Pattern c	hsa-miR-1178-002777	34.622	14.97	1.367	0	0.01
Pattern c	hsa-let-7a#-002307	32.441	15.771	0.504	0.165	0.017
Pattern c	hsa-miR-1300-002902	31.78	14.178	0.81	0.08	0.026
Pattern c	hsa-miR-483-3p-002339	27.596	9.995	1.119	0.054	0.036
Pattern c	hsa-let-7g#-002118	31.274	14.59	0.781	0.153	0.043
Pattern d	ath-miR159a-000338	30.236	14.99	1.099	0.004	0
Pattern d	hsa-miR-541#-002200	31.594	12.926	1.309	0	0
Pattern d	hsa-miR-875-5p-002203	31.23	12.663	1.534	0.01	0.02
Pattern d	hsa-miR-149#-002164	29.144	11.634	0.592	0.096	0.043
Pattern d	hsa-miR-675-002005	30.67	13.159	0.918	0.048	0.044
Pattern a	hsa-miR-922-002152	33.782	15.812	0.039	0.18	0.043
Pattern a	hsa-miR-548d-5p-002237	34.271	14.968	0.057	0.013	0.005
Pattern a	hsa-miR-516-3p-001149	35.047	17.076	0.956	0.009	0.046
Pattern a	hsa-miR-1825-002907	20.677	2.706	0.008	4.206	0.05
Pattern b	U6 snRNA-001973	12.778	-5.163	0.379	0.23	0.003
Pattern b	hsa-miR-889-002202	31.104	13.172	0.436	0.019	0
Pattern b	hsa-miR-770-5p-002002	29.6	11.65	0.427	0.078	0
Pattern b	hsa-miR-662-001607	31.402	14.067	0.658	0.062	0.001
Pattern b	hsa-miR-616-001589	32.811	15.476	0.707	0.112	0.007
Pattern b	hsa-miR-520b-001116	30.998	13.358	1.193	0.001	0
Pattern b	hsa-miR-519b-3p-002384	29.706	12.807	1.004	0.046	0.015
Pattern b	hsa-miR-33a-002135	33.514	15.563	0.955	0.039	0
Pattern b	hsa-miR-335#-002185	28.189	10.239	0.588	0.137	0.004
Pattern b	hsa-miR-31#-002113	31.259	13.308	0.842	0.106	0.009
Pattern b	hsa-miR-29a#-002447	30.789	12.838	0.508	0.178	0.005
Pattern b	hsa-miR-200a#-001011	31.024	12.43	0.801	0.046	0
Pattern b	hsa-miR-19b-1#-002425	29.891	11.941	0.571	0.168	0.004
Pattern b	hsa-miR-195#-002107	33.27	14.485	1.815	0.003	0.003
Pattern b	hsa-miR-125b-2#-002158	26.637	8.687	0.675	0.081	0.005
Pattern b	hsa-miR-101#-002143	34.795	17.369	1.502	0.04	0.017
Pattern c	rno-miR-29c#-001818	27.416	9.814	0.339	0.242	0
Pattern c	hsa-miR-99a#-002141	27.797	10.196	0.552	0.116	0
Pattern c	hsa-miR-944-002189	33.316	16.333	0.67	0.184	0.008
Pattern c	hsa-miR-943-002188	32.616	14.982	1.058	0.066	0.001
Pattern c	hsa-miR-92b#-002343	33.681	17.411	1.986	0.001	0
Pattern c	hsa-miR-758-001990	30.613	14.799	0.581	0.233	0.026
Pattern c	hsa-miR-720-002895	14.563	-3.039	0.544	0.251	0.004
Pattern c	hsa-miR-708-002341	33.838	17.428	1.645	0.026	0
Pattern c	hsa-miR-668-001992	34.841	17.737	0.847	0.196	0.05
Pattern c	hsa-miR-665-002681	35.161	18.024	1.683	0.017	0.036
Pattern c	hsa-miR-661-001606	28.179	10.578	0.646	0.099	0
Pattern c	hsa-miR-644-001596	33.007	16.024	1.262	0.023	0
Pattern c	hsa-miR-628-3p-002434	29.03	11.429	0.447	0.158	0
Pattern c	hsa-miR-609-001573	24.498	5.565	1.652	0.038	0.026
Pattern c	hsa-miR-604-001567	28.623	11.64	1.362	0.007	0
Pattern c	hsa-miR-601-001558	31.272	14.289	0.491	0.176	0.001
Pattern c	hsa-miR-596-001550	24.306	6.704	0.514	0.144	0
Pattern c	hsa-miR-592-001546	31.359	14.376	0.792	0.044	0
Pattern c	hsa-miR-590-3P-002677	29.708	12.107	0.782	0.046	0
Pattern c	hsa-miR-572-001614	29.936	12.334	0.544	0.303	0.029
Pattern c	hsa-miR-571-001613	28.247	10.646	0.645	0.131	0
Pattern c	hsa-miR-497-001043	29.709	13.439	0.563	0.019	0
Pattern c	hsa-miR-483-3p-002339	27.596	9.995	1.119	0.062	0.009
Pattern c	hsa-miR-429-001024	30.344	14.529	0.621	0.18	0.003
Pattern c	hsa-miR-33a#-002136	29.423	11.822	0.256	0.443	0.005
Pattern c	hsa-miR-338-3p-002252	31.737	15.417	0.96	0.055	0
Pattern c	hsa-miR-30e-3p-000422	21.617	4.016	0.311	0.287	0
Pattern c	hsa-miR-30a-5p-000417	20.767	3.165	0.413	0.266	0.017
Pattern c	hsa-miR-30a-3p-000416	22.038	4.437	0.3	0.237	0
Pattern c	hsa-miR-29b-2#-002166	30.092	12.49	0.388	0.272	0.004
Pattern c	hsa-miR-26a-1#-002443	29.704	12.103	0.338	0.062	0
Pattern c	hsa-miR-218-000521	26.693	9.015	0.493	0.152	0
Pattern c	hsa-miR-214#-002293	27.744	10.142	0.643	0.033	0
Pattern c	hsa-miR-20a#-002437	31.751	14.33	0.466	0.104	0
Pattern c	hsa-miR-202#-002362	33.638	15.424	1.323	0	0
Pattern c	hsa-miR-200c-002300	24.076	7.756	0.782	0.169	0.033
Pattern c	hsa-miR-188-3p-002106	33.181	14.656	2.242	0.001	0
Pattern c	hsa-miR-186#-002105	30.828	13.845	1.212	0.052	0
Pattern c	hsa-miR-16-1#-002420	29.819	12.217	0.474	0.207	0.002
Pattern c	hsa-miR-149#-002164	29.828	12.227	0.762	0.054	0
Pattern c	hsa-miR-145#-002149	29.723	12.121	0.338	0.094	0
Pattern c	hsa-miR-144#-002148	32.245	15.771	1.482	0.052	0.008
Pattern c	hsa-miR-141-000463	31.162	14.841	0.758	0.021	0
Pattern c	hsa-miR-132#-002132	34.157	16.491	0.47	0.084	0
Pattern c	hsa-miR-1303-002792	28.443	11.46	0.447	0.18	0.001
Pattern c	hsa-miR-1290-002863	30.413	12.812	1.384	0.008	0
Pattern c	hsa-miR-1288-002832	34.228	15.731	0.406	0.106	0.003
Pattern c	hsa-miR-1267-002885	31.373	13.771	0.803	0.102	0.008
Pattern c	hsa-miR-1260-002896	21.748	4.147	0.57	0.188	0.004
Pattern c	hsa-miR-126#-000451	24.453	6.851	0.644	0.035	0
Pattern c	hsa-miR-125b-1#-002378	30.912	13.311	0.588	0.138	0.01
Pattern c	hsa-miR-1228#-002763	28.321	10.687	1.228	0.058	0.005
Pattern c	hsa-miR-1208-002880	31.461	13.859	0.74	0.081	0
Pattern c	hsa-miR-1201-002781	25.31	7.708	0.324	0.319	0.006
Pattern c	hsa-let-7i#-002172	30.867	13.266	0.56	0.314	0.043
Pattern c	hsa-let-7a#-002307	32.441	15.771	0.504	0.023	0
Pattern d	mmu-miR-491-001630	29.362	14.497	1.325	0.042	0.003
Pattern d	hsa-miR-875-5p-002203	31.23	12.663	1.534	0	0
Pattern d	hsa-miR-769-3p-002003	29.031	12.092	0.224	0.284	0.049
Pattern d	hsa-miR-675-002005	30.67	13.159	0.918	0.018	0
Pattern d	hsa-miR-656-001510	35.088	16.42	1.15	0.016	0
Pattern d	hsa-miR-650-001603	25.393	6.725	0.32	0.166	0.001
Pattern d	hsa-miR-646-001599	31.432	12.369	2.143	0.017	0.013
Pattern d	hsa-miR-639-001583	28.931	10.263	1.584	0.002	0
Pattern d	hsa-miR-621-001598	29.569	9.899	1.588	0	0
Pattern d	hsa-miR-584-001624	29.141	10.473	1.017	0.017	0
Pattern d	hsa-miR-567-001534	33.076	14.408	1.674	0.003	0
Pattern d	hsa-miR-551a-001519	34.074	15.015	0.746	0	0
Pattern d	hsa-miR-548L-002904	30.32	14.446	1.144	0.006	0.04
Pattern d	hsa-miR-548b-001541	32.022	13.764	4.914	0	0.009
Pattern d	hsa-miR-541#-002200	31.594	12.926	1.309	0	0
Pattern d	hsa-miR-520D-3P-002743	28.863	10.296	2.497	0	0
Pattern d	hsa-miR-512-5p-001145	29.92	15.041	1.481	0.003	0.001
Pattern d	hsa-miR-452#-002330	34.24	17.25	0.655	0	0
Pattern d	hsa-miR-378-002243	20.635	1.967	1.276	0.001	0
Pattern d	hsa-miR-377#-002128	32.378	14.728	0.685	0	0
Pattern d	hsa-miR-30c-1#-002108	30.093	11.425	0.913	0	0
Pattern d	hsa-miR-223#-002098	29.534	10.866	0.688	0.168	0.025
Pattern d	hsa-miR-200b-002251	27.275	12.41	2.498	0.008	0.008
Pattern d	hsa-miR-200a-000502	27.048	12.183	2.103	0.013	0.002
Pattern d	hsa-miR-199b-000500	30.863	15.998	1.314	0.031	0.004
Pattern d	hsa-miR-198-002273	30.536	15.776	2.03	0.001	0
Pattern d	hsa-miR-143#-002146	25.675	7.008	1.781	0.027	0.004
Pattern d	hsa-miR-140-3p-002234	31.97	17.105	2.738	0.01	0.004
Pattern d	hsa-miR-136#-002100	32.18	13.512	0.813	0.035	0
Pattern d	hsa-miR-130a#-002131	34.716	17.726	0.615	0.014	0.001
Pattern d	hsa-miR-1305-002867	31.821	13.153	1.135	0	0
Pattern d	hsa-miR-1298-002861	29.881	11.214	1.168	0.105	0.018
Pattern d	hsa-miR-1274A-002883	19.913	1.246	0.778	0.099	0.011
Pattern d	hsa-miR-1255A-002805	32.669	15.729	0.333	0.002	0
Pattern d	hsa-miR-1247-002893	26.103	7.435	0.736	0.049	0
Pattern d	hsa-miR-1225-3P-002766	25.85	7.182	0.881	0.001	0
